# Supplementary material
Source: ML conference proceedings conference paper supplement (https://openreview.net/forum?id=gL4muAFwsh)
Supplement: supplementary_material [file full_paper.pdf › SGB/full_paper.pdf]

---

# Does Stochastic Gradient really succeed for Bandits?

---

Anonymous Author(s)

Affiliation

Address

email

## Abstract

Recent works of Mei et al. [1, 2] have deepened the theoretical understanding of the *Stochastic Gradient Bandit* (SGB) policy, showing that using a constant learning rate guarantees asymptotic convergence to the optimal policy, and that sufficiently *small* learning rates can yield logarithmic regret. However, whether logarithmic regret holds beyond small learning rates remains unclear. In this work, we take a step towards characterizing the regret *regimes* of SGB as a function of its learning rate. For two-armed bandits, we identify a sharp threshold, scaling with the sub-optimality gap  $\Delta$ , below which SGB achieves *logarithmic* regret on all instances, and above which it can incur *polynomial* regret on some instances. This result highlights the necessity of knowing (or estimating)  $\Delta$  to ensure logarithmic regret with a constant learning rate. For general  $K$ -armed bandits, we further show the learning rate must additionally scale inversely with  $K$  to avoid polynomial regret. We introduce novel techniques to derive regret upper bounds for SGB, laying the groundwork for future advances in the theory of gradient-based bandit algorithms.

## 1 Introduction

A  $K$ -armed bandit is a sequential decision-making problem where, at each time  $t \in [T]$ , a learner chooses an action  $A_t \in [K]$  and receives a reward  $r_t$  drawn independently at random from the fixed distribution  $\nu_{A_t}$ . The objective is to select a policy  $\pi$ , which at each step  $t$  maps past observations  $\mathcal{H}_{t-1} = (A_s, r_s)_{s \in [t-1]}$  to a *sampling probability*  $p_{k,t}^\pi = \mathbb{P}_\pi(A_t = k \mid \mathcal{H}_{t-1})$  for each arm  $k \in [K]$ , in order to maximize the expected cumulative reward  $\mathbb{E}_\pi[\sum_{t=1}^T r_t]$  when actions are chosen according to  $\pi$ . This is equivalent to minimizing the *regret*, defined by

$$\mathcal{R}_T^\pi := \mathbb{E}_\pi \left[ \sum_{t=1}^T \sum_{k=1}^K \Delta_k \mathbb{1}(A_t = k) \right], \text{ with } \forall k, \Delta_k = \max_{j \in [K]} \mu_j - \mu_k \text{ and } \mu_k = \mathbb{E}_{r \sim \nu_k}[r], \quad (1)$$

$$\text{or equivalently } \mathcal{R}_T^\pi = \mathbb{E}_\pi \left[ \sum_{t=1}^T \sum_{k=1}^K p_{k,t}^\pi \Delta_k \right] \leq \mathbb{E}_\pi \left[ \sum_{t=1}^T (1 - p_{1,t}^\pi) \right] \cdot \max_{k \in [K]} \Delta_k, \quad (2)$$

where for convenience we assume that arm 1 is the unique optimal arm, i.e.,  $\mu_1 > \max_{j \in \{2, \dots, K\}} \mu_j$ . We further define the *minimum gap*  $\Delta := \min_{k: \Delta_k > 0} \Delta_k$ . Finally, we denote by  $\mathcal{F}$  the family of reward distributions supported on  $[-1, 1]$ , and assume that  $\nu_k \in \mathcal{F}$  for all  $k \in [K]$ .

**Notation** We now detail the symbols used throughout the paper. Let  $(A, B) \in \mathbb{R}^2$ , then:  $A \wedge B = \min\{A, B\}$ ,  $A \vee B = \max\{A, B\}$ , and  $(A)_+ = A \vee 0$ . If  $A, B$  depend on the horizon  $T$ , we use interchangeably  $A \lesssim B$  or  $A = \mathcal{O}(B)$  (resp.  $A \gtrsim B$  and  $A = \Omega(B)$ ) when there exists  $c > 0$  s.t.  $A \leq cB$  (resp.  $\geq$ ) and  $c$  is independent of  $T$  but can be problem-dependent. To hide poly-logarithmic factors in  $T$ , we respectively use  $\tilde{\mathcal{O}}$  and  $\tilde{\Omega}$ , for example  $A \geq T/\log(T) \implies A = \tilde{\Omega}(T)$ . Finally, we use  $A \asymp B$  when both  $A \lesssim B$  and  $B \lesssim A$  hold.

## 31 1.1 Motivation and related work

32 Stochastic gradient ascent methods have been extensively studied in the context of bandits and  
 33 reinforcement learning, tracing back to foundational works such as Robbins and Monro’s stochastic  
 34 approximation [3], the REINFORCE algorithm [4], and subsequent developments in policy gradient  
 35 (PG) methods [5]. Despite the empirical success of these algorithms in modern deep reinforcement  
 36 learning [6–10], the theoretical understanding of their convergence and regret guarantees remains  
 37 limited. This motivates a closer examination of their foundational components in simpler settings.  
 38 We study one such component, the Stochastic Gradient Bandit algorithm (SGB) [11, Chapter 2.8], a  
 39 softmax policy gradient method for Multi-Armed Bandits (MAB).

40 A central challenge in analyzing SGB stems from the weakness of its underlying optimization structure,  
 41 making the analysis difficult even in the case of PG with access to exact gradient information [12].  
 42 The optimization challenge arises from the softmax parameterization satisfying only a non-uniform  
 43 version of the Polyak–Łojasiewicz (PL) inequality [13, Lemma 3]. Consequently, if the sampling  
 44 probability of the best arm becomes too small, the gradient signal vanishes and SGB may require an  
 45 exponentially long time to recover, even with access to exact gradients [14, 15]. Nevertheless, PG with  
 46 softmax parameterization and exact gradients has been shown to converge to a globally optimal policy  
 47 asymptotically [16, Theorem 5.1], and with a  $\mathcal{O}(1/T)$  rate [13], although the rate of convergence  
 48 depends on suitable initialization and problem dependent constants [14, 15]. Convergence guarantees  
 49 have also been obtained with regularization [12] or by modifying the softmax function [17].

50 The analysis of SGB with stochastic gradients becomes even more convoluted. Contrary to typical  
 51 policies like UCB [18] or Thompson Sampling [19], the decisions of SGB depend intricately on the  
 52 order in which all past rewards were collected, and thus cannot be analyzed through simple summary  
 53 statistics; see Appendix A.3 for a detailed comparison with standard bandit policies. Despite these  
 54 difficulties, a number of recent works are able to show global convergence of variants of SGB (and  
 55 its generalization for Markov Decision Process) [20–27]. However, these result require decaying  
 56 learning rate or regularization resulting in at best  $\mathcal{O}(1/\sqrt{T})$  convergence rate [20–23]. Mei et al. [28]  
 57 showed that natural policy gradient with oracle baselines achieves a  $\mathcal{O}(1/T)$  convergence rate. A  
 58 closely related algorithm to SGB is SAMBA [29], a policy that achieves logarithmic regret for Bernoulli  
 59 rewards by performing stochastic gradient ascent directly on the sampling probabilities without  
 60 relying on the softmax transformation; for a detailed comparison to SGB see Appendix B.2.

61 Recently, Mei et al. [1] established a regret upper bound of  $\mathcal{O}(\log(T))$  for SGB with a *small* constant  
 62 learning rate  $\eta$  satisfying  $\eta \lesssim \Delta^2/K^{3/2}$  where  $K$  is the number of arms. In a follow-up work,  
 63 Mei et al. [2] further proved that SGB asymptotically converges to a globally optimal policy for *any*  
 64 constant learning rate. While asymptotic convergence is a desirable property, it does not guarantee  
 65 favorable regret guarantees, as we discuss in Appendix A.4. This motivates further investigation of  
 66 the regret properties of SGB without the small rate constraint.

67 The goal of our work is to characterize the strengths and limitations of SGB, as a principled yet simple  
 68 and scalable learning rule; which is representative of algorithms that have shown empirical success in  
 69 more complex, large-scale settings. Importantly, our aim is not to promote SGB over state-of-the-art  
 70 bandit algorithms such as KL-UCB [30] or Thompson Sampling [31, 32]. To achieve our goal, in this  
 71 work, we depart from optimization-based analyses of SGB and develop a regret-based analysis. Our  
 72 analysis exploits a novel decomposition into a term that remains logarithmic for **all** learning rates,  
 73 and a second term capturing the probability of *failure*—that is, the chance that the optimal arm fails to  
 74 stand out—which crucially depends on  $\eta$ . This enables us to determine regimes where SGB succeeds.

## 75 1.2 The Stochastic Gradient Bandit policy (SGB)

76 Following Sutton and Barto [11, Section 2.8], we define SGB as a randomized policy, with sampling  
 77 probabilities at time  $t \geq 1$  given by the softmax transform of some parameters  $(\theta_{k,t})_{k \in [K]} \in \mathbb{R}^K$ ,

$$\forall t \in [T], \forall k \in [K] : p_{k,t}^{\text{SGB}} \propto \exp(\theta_{k,t}) . \quad (3)$$

78 In the following, we drop the superscript for simplicity of notation. Given a fixed learning rate  $\eta$ , the  
 79 parameter of each arm  $k \in [K]$  is initialized at  $\theta_{k,1} = 0$ , and is updated as follows,

$$\forall t \geq 1 : \theta_{k,t+1} = \theta_{k,t} + \eta \cdot \delta \theta_{k,t}, \text{ with } \delta \theta_{k,t} := (1 - p_{k,t}) \cdot r_t \cdot \mathbb{1}(A_t = k) - p_{k,t} \cdot r_t \cdot \mathbb{1}(A_t \neq k) . \quad (4)$$

80 For completeness, we provide the pseudo-code of SGB in Algorithm 1 in Appendix A.1. Proposition  
 81 2.3 of [1] shows that SGB is indeed performing stochastic gradient ascent with respect to the *value*

of the policy at time  $t$ ,  $V_t^{\text{SGB}} := \sum_{k=1}^K p_{k,t} \cdot \mu_k$ , and that  $(\delta\theta_{k,t})_{k \in [K]}$  is an unbiased estimate of the gradient  $\nabla_{\theta} V_t$ . In the rest of the paper, we use the shorthand notation  $\mathbb{E}_t[\cdot]$  for the conditional expectation  $\mathbb{E}[\cdot | \mathcal{H}_t]$ . From Equation (4), we derive the following first fundamental property of SGB,

$$\forall k \in [K], t \geq 1 : \mathbb{E}_t[\delta\theta_{k,t}] = p_{k,t}(1 - p_{k,t})\mu_k - p_{k,t} \sum_{j \neq k} p_{j,t}\mu_j = p_{k,t} \cdot (\mathbb{E}_t[\Delta_{A_t}] - \Delta_k) . \quad (5)$$

Hence,  $\theta_{k,t}$  is expected to increase when the gap of arm  $k$  is smaller than  $\mathbb{E}_t[\Delta_{A_t}] = \sum_{j=1}^K p_{j,t}\Delta_j$ , the instantaneous regret of SGB. From (5), we have that if arm 1 is the only optimal arm, then

$$\mathbb{E}[\theta_{1,T+1}] = \eta \cdot \mathbb{E} \left[ \sum_{t=1}^T \delta\theta_{1,t} \right] = \eta \cdot \mathbb{E} \left[ \sum_{t=1}^T p_{1,t} \mathbb{E}_t[\Delta_{A_t}] \right] \geq \eta \cdot \mathbb{E} \left[ \sum_{t=1}^T p_{1,t}(1 - p_{1,t})\Delta \right] \quad (6)$$

which is an equality if all sub-optimal arms have the same gap  $\Delta$ . This allows us to express an upper bound on the regret as a function of the parameter  $\theta_{1,T+1}$ . Defining  $\Delta_{\max} = \max_{k \in [K]} \Delta_k$ , and using that  $(1 - p_{1,t}) = p_{1,t}(1 - p_{1,t}) + (1 - p_{1,t})^2$ , by plugging (6) into (2) we obtain that

$$\mathcal{R}_T \leq \Delta_{\max} \cdot \mathbb{E} \left[ \sum_{t=1}^T (1 - p_{1,t}) \right] \leq \underbrace{\frac{\Delta_{\max}}{\eta\Delta} \cdot \mathbb{E}[\theta_{1,T+1}]}_{\text{Post-convergence term}} + \underbrace{\Delta_{\max} \cdot \mathbb{E} \left[ \sum_{t=1}^T (1 - p_{1,t})^2 \right]}_{\text{Failure regret}} . \quad (7)$$

This regret decomposition, though obtained via a straightforward reformulation, appears to be novel and, to the best of our knowledge, has not been exploited in prior analyses of SGB. In fact, Equation (7) provides a powerful lens through which we develop all the upper bounds in this work, as it splits the regret into two interpretable components. In Section 3, we prove that the *post-convergence* term is bounded by  $\mathcal{O}(\log T)$  for **any** learning rate. Therefore, whether SGB achieves logarithmic regret or not depends entirely on the scaling of the *failure regret*. We justify this terminology in Appendix F.1, where we discuss an alternative formulation of Eq. (7) establishing the relation between failure regret and the sum of probabilities that  $p_{1,t}$  stays bounded away from 1. The empirical study in Section 4 further supports this decomposition: most trajectories of SGB fall into one of two distinct regimes—*successful runs*, with convergence to the optimal policy at rate  $\mathcal{O}(t^{-1})$ , and *failed runs*, where the optimal arm remains persistently under-sampled up to horizon  $T$ .

In addition to the above regret bound, we present in Appendix A.2 some other elementary properties of SGB that can be directly derived from its update rule (4), and will be useful in our analyses.

### 1.3 Outline and contributions

We introduced in Section 1.2 an original decomposition of the regret of SGB into a *post-convergence term* and a *failure regret*. In Section 2, we build on Eq. (7) to provide a tight regret analysis for two-armed bandits when  $\eta \lesssim \Delta$  (Thm. 1). We then prove in Thm. 2 that the regret of SGB can be **polynomial** on some instances if  $\eta \gtrsim \Delta$ . Hence, we fully characterize the regret of SGB in two-armed bandits, except for a critical regime  $\eta \approx \Delta$  that we discuss in Section 2.2. In particular, *knowing a lower bound on the gap  $\Delta$  is necessary and sufficient to tune  $\eta$  to guarantee logarithmic regret*. We summarize our results for the two-armed bandit problem in Table 1 below, denoting by  $\mathcal{F}_{\Delta}^2$  the class of two-armed bandits with distributions supported on  $[-1, 1]$  and gap larger than  $\Delta \in (0, 1)$ .

| $\eta$          | $\leq \Delta - \mathcal{O}(\Delta^2)$                                                          | $\approx \Delta$                                                                                                                               | $\geq \Delta + \mathcal{O}(\Delta^2)$                                                                                                                |
|-----------------|------------------------------------------------------------------------------------------------|------------------------------------------------------------------------------------------------------------------------------------------------|------------------------------------------------------------------------------------------------------------------------------------------------------|
| $\mathcal{R}_T$ | $\forall \nu \in \mathcal{F}_{\Delta}^2, \mathcal{R}_T \leq \frac{\log(T)}{2\eta}$<br>(Thm. 1) | $\exists \nu_0 \in \mathcal{F}_{\Delta}^2$ s.t.<br>$\mathbb{E}[(1 - p_{1,t})^2] \asymp t^{-1}$<br>(Conjecture from the proofs of Thm. 1 and 2) | $\exists \nu_1 \in \mathcal{F}_{\Delta}^2$ s.t.<br>$\mathcal{R}_T = \tilde{\Omega} \left( T^{1 - \frac{\Delta}{\eta(1-\Delta)}} \right)$<br>(Thm. 2) |
| Regime          | <b>Logarithmic</b>                                                                             | <b>Critical</b>                                                                                                                                | <b>Polynomial</b>                                                                                                                                    |

Table 1: Regret guarantees for SGB as a function of  $\eta$  for two-armed bandits

In Section 3, we consider a general number of arms  $K$ . Using lower bound arguments, we first prove a second necessary condition: logarithmic regret can be guaranteed *only* if  $\eta$  **decreases linearly** in  $K$

(Thm. 3). By combining this result with Thm. 2 we conjecture that the critical tuning of  $\eta$  might be proportional to  $\Delta/K$ . For the regret analysis, we establish in Lemma 2 that the post-convergence term is logarithmic **for any constant learning rate**. Then, in Lemma 3, we derive an intermediate upper bound on the failure regret. The upper bound contains additional terms compared to the case  $K = 2$ , causing significant technical challenges that we detail, but leave their dedicated analysis for future work. Nonetheless, as a promising first complete result for  $K$ -armed problems, we prove in Theorem 4 that the regret of SGB is logarithmic if  $\eta e^{2\eta} \leq \frac{2\Delta}{K+2}$ , when *all arms have identical gap*  $\Delta$ . Finally, in Section 4 we present some synthetic experiments that illustrate our theoretical findings.

## 2 Characterizing the regret regimes for two-armed bandits

In this section we propose a tight characterization of the regret regimes of SGB when  $K = 2$ . We exhibit a separation between logarithmic and polynomial regret close to the gap  $\Delta$ .

### 2.1 Regret analysis for $\eta \leq \Delta - \mathcal{O}(\Delta^2)$

We directly detail the main result of this section and its complete proof.

**Theorem 1** (Regret upper bound for  $K = 2$ ). *For a two-armed bandit instance  $\nu \in \mathcal{F}^2$  with a gap  $\Delta \in (0, 1)$ , the regret of SGB tuned with a learning rate  $\eta$  satisfying  $\eta C_\eta < \Delta$  is upper bounded by*

$$\mathcal{R}_T^{\text{SGB}} \leq \frac{\log(1 + 4\eta\Delta T)}{2\eta} + \frac{\Delta}{2\eta(\Delta - \eta C_\eta)}, \quad \text{with } C_\eta := 2 \sum_{n=0}^{+\infty} \frac{(2\eta)^n}{(n+2)!} \leq e^{2\eta}.$$

*Proof.* Since  $\theta_{2,t} = -\theta_{1,t}$  for all steps  $t$ , by (9), we drop the subscript 1 to simplify the notation. Starting from the regret decomposition of Equation (7), we readily obtain that for any instance  $\nu$ ,

$$\mathcal{R}_T^{\text{SGB}} \leq \frac{\mathbb{E}[\theta_{T+1}]}{\eta} + \Delta \cdot \mathbb{E} \left[ \sum_{t=1}^T (1 - p_t)^2 \right].$$

We start by upper bounding  $\mathbb{E}[\theta_{T+1}]$ . Jensen inequality provides that

$$\mathbb{E}[\theta_{T+1}] = \frac{1}{2} \cdot \mathbb{E}[\log(e^{2\theta_{T+1}})] \leq \frac{1}{2} \cdot \log(\mathbb{E}[e^{2\theta_{T+1}}]).$$

We then use the update rule of  $(\theta_t)_{t \geq 1}$  to upper bound  $\mathbb{E}[e^{2\theta_t}]$ . From the Taylor expansion of the exponential, for any constant  $q \in \mathbb{R}$  and random variable  $r$  supported on  $[-1, 1]$ , it holds that

$$\mathbb{E}[e^{qr}] = 1 + q\mathbb{E}[r] + \sum_{n=2}^{+\infty} \frac{q^n}{n!} \mathbb{E}[r^n] \leq 1 + q\mathbb{E}[r] + q^2 \cdot \sum_{n=2}^{+\infty} \frac{q^{n-2}}{n!} \leq 1 + q\mathbb{E}[r] + \frac{q^2}{2} \cdot C_{\frac{|q|}{2}}. \quad (8)$$

Using the notation  $a_t = 2\eta(1 - p_t)$  and  $b_t = 2\eta p_t$ , for any  $t \geq 1$  Eq. (4) and (8) give that

$$\begin{aligned} \mathbb{E}_t[e^{2\theta_{t+1}}] &= e^{2\theta_t} \cdot \mathbb{E}_t[e^{2\eta\delta\theta_t}] \leq e^{2\theta_t} \cdot (p_t \mathbb{E}_t[e^{a_t r_t} | A_t = 1] + (1 - p_t) \mathbb{E}_t[e^{-b_t r_t} | A_t = 2]) \\ &\leq e^{2\theta_t} \cdot (1 + p_t \cdot (a_t \mu_1 + a_t^2 \cdot 0.5 \cdot C_{a_t/2}) + (1 - p_t) \cdot (-b_t \mu_2 + b_t^2 \cdot 0.5 \cdot C_{b_t/2})) \\ &\leq e^{2\theta_t} \cdot (1 + 2p_t(1 - p_t) \cdot (\eta\Delta + \eta^2 C_\eta)) \quad , \quad \text{since } a_t \vee b_t \leq 2\eta. \end{aligned}$$

Then, we use the relation  $e^{2\theta_t}(1 - p_t) = p_t$  (Eq. (11) in Appendix A) to obtain that

$$\forall t \geq 1, \mathbb{E}_t[e^{2\theta_{t+1}}] \leq e^{2\theta_t} + p_t^2 \cdot 2(\eta\Delta + \eta^2 C_\eta) \implies \mathbb{E}[e^{2\theta_{T+1}}] \leq 1 + 2(\eta\Delta + \eta^2 C_\eta) \cdot T,$$

which gives the logarithmic term in the theorem. It remains to upper bound  $\mathbb{E}[\sum_{t=1}^T (1 - p_t)^2]$ . For  $t \geq 1$ , we define  $x_t := \frac{1 - p_t}{p_t} = e^{-2\theta_t}$ , and obtain with the same arguments as above that

$$\mathbb{E}_t[x_{t+1}] \leq x_t \cdot (1 - 2p_t(1 - p_t)\eta\Delta + 2p_t(1 - p_t)\eta^2 C_\eta) = x_t - 2\eta(1 - p_t)^2 \cdot (\Delta - \eta C_\eta).$$

By taking expectation on both sides and summing over time steps, we thus obtain that

$$\mathbb{E}[x_{T+1} - x_1] \leq -2\eta \cdot (\Delta - \eta C_\eta) \cdot \mathbb{E} \left[ \sum_{t=1}^T (1 - p_t)^2 \right],$$

from which the result follows by using that  $\mathbb{E}[x_1 - x_{T+1}] \leq x_1 = 1$  and that  $\Delta - \eta C_\eta > 0$ .  $\square$

**Tightness of the bound** In addition to being strikingly simple, the proof of Thm. 1 is also tight under the assumption that rewards are bounded in  $[-1, 1]$ . First, for  $\nu_1 = \text{Rad}(\Delta)$  and  $\nu_2 = \text{Rad}(0)$ , and  $\eta C_\eta = (1-\varepsilon)\Delta$  for some  $\varepsilon > 0$ , the logarithmic (post-convergence) term matches the asymptotic lower bound up to a factor  $(1-\varepsilon)^{-1}(1+\mathcal{O}(\Delta))$  (see D.1 for details). It thus cannot be much improved if  $\varepsilon, \Delta$  are small. For the constant term, the only possible improvement would be to use higher-order moments for a tighter approximation in Eq.(8). However, for Rademacher distributions we could at most replace  $C_\eta$  by 1, so the gain would be minor for small  $\eta$  since we already have that  $C_\eta \leq e^{2\eta}$ .

**Comparison with existing results** Theorem 1 is a fully explicit regret upper bound, which surprisingly does not rely on any techniques from standard analyses of gradient ascent policies. For two arms, we obtain guarantees for a much broader range of learning rates<sup>1</sup> than Mei et al. [1], and even obtain near-optimal logarithmic scaling of the regret if  $\eta$  happens to be close to  $\Delta$ . We then compare SGB with SAMBA, another policy performing (non-parametric) gradient ascent. For two arms, SAMBA running with parameter  $\alpha < \Delta$  achieves a regret bound of  $\alpha^{-1} \log(T)$  [29], which is close to our result. We elaborate on the comparison between the two policies in Appendix B.2. While their analysis extends to  $K > 2$ , it is more involved than the proof of Thm. 1, is restricted to Bernoulli rewards, and involves non-explicit and potentially large constants. Finally, we highlight that the logarithmic component of Thm. 1 is valid for **all** constant  $\eta$ . Hence, for SGB restricting  $\eta$  is required **only** to guarantee that the failure regret converges, which is a novel insight compared to [29].

**Alternative moment-based condition** A closer examination of Eq. (8) reveals that the analysis of Thm. 1 can be extended or sharpened under general moment assumptions on the reward distribution. For example, if one assumes that  $\sup_{m \geq 2} \mathbb{E}[r_t^m] \leq s^2$  for some  $s > 0$ , then the result continues to hold by scaling the term  $\eta C_\eta$  by  $s^2$  when bounding the failure regret, so  $\eta C_\eta < \frac{\Delta}{s^2}$  is sufficient for logarithmic regret. Hence, SGB can be fine-tuned under higher-moment conditions, akin to how Bernstein-type inequalities [33, Chapter 2.8] improve confidence intervals in UCB-style algorithms. Such assumptions are often realistic in applications like marketing or online advertising, where reward distributions are typically bounded and the average outcomes (e.g., click rates) are small [34, 35]. Notably, for SGB these assumptions merely expand the admissible range of learning rates. By contrast, standard approaches would require substantial structural changes, such as tighter confidence intervals for UCB or modified priors/posteriors for TS, to exploit higher-order moment information.

**Knowledge of  $\Delta$**  While assuming that a lower bound on  $\Delta$  is known remains a strong requirement, we conclude this section by showing that, even without this knowledge, a learning rate that depends only on the time horizon  $T$  leads to meaningful regret guarantees in the two-armed bandit setting.

**Corollary 1** (of Theorem 1). *If  $\Delta$  is unknown, one can set  $\eta = \sqrt{\frac{\log(T)}{T}}$ , which yields*

$$\forall \nu \in \mathcal{F}^2, \mathcal{R}_T \lesssim \frac{\log(T)}{\eta} \cdot \mathbb{1}(2\eta C_\eta \leq \Delta) + \Delta T \cdot \mathbb{1}(\Delta < 2\eta C_\eta) \lesssim \sqrt{T \log(T)},$$

*by using the upper bound from the theorem if  $\eta$  is small enough, and  $\mathcal{R}_T \leq \Delta T$  otherwise.*

In Proposition 4 (App. F.3) we further prove that a time-varying learning rate  $\eta_t = \sqrt{\log(e \vee t)/t}$  also yields  $\mathcal{R}_T = \tilde{\mathcal{O}}(\sqrt{T})$ . While Mei et al. [1, Section 3] hint that such a rate may be an appropriate tuning for SGB, it appears that comparable results to ours have only been obtained with regularization added to the policy update, as in [20, 21]. On the other hand, the regret upper bound of the gap-free variant of SAMBA [29, Thm.2] still involves large problem-dependent constants, while the constants in Corollary 1 are absolute. Hence, the time-dependent tuning of  $\eta$  that we propose stands out as a practical choice when no lower bound on  $\Delta$  is available (see Appendix G.1 for experiments).

## 2.2 Necessary condition on fixed $\eta$ for logarithmic regret

In this section, we prove that the knowledge of the minimum gap  $\Delta$  is necessary to tune the fixed learning rate of SGB in order to obtain logarithmic regret. The following Thm. 2 shows that if  $\eta$  is larger than a fixed constant that depends on the gap  $\Delta$  and the number of arms  $K$ , there exists a  $K$ -armed bandit problem with gap  $\Delta$  for which SGB has polynomial regret. To define it, for  $\mu \in [-1, 1]$  we denote resp. by  $\text{Rad}(\mu)$  and  $\delta_\mu$  the Rademacher and Dirac distributions of mean  $\mu$ .

<sup>1</sup>We document in Appendix B.1 a potential issue with their result, and propose a non-trivial fix for  $K = 2$ .

187 **Theorem 2** (Polynomial regret). *Let  $\nu = (\nu_k)_{k \in [K]} \in \mathcal{F}^K$  be a bandit instance defined by  $\nu_1 =$   
188  $\text{Rad}(\Delta)$  for some  $\Delta \in (0, 1)$ , and  $\nu_2 = \dots = \nu_K = \delta_0$ . Then, it holds that*

$$\eta > \lambda_\Delta := \frac{K-1}{K} \cdot \log \left( 1 + 2 \frac{\Delta}{1-\Delta} \right) \implies \forall \varepsilon > 0, \mathcal{R}_T = \tilde{\Omega} \left( T^{1-(1+\varepsilon) \cdot \frac{\lambda_\Delta}{\eta}} \right),$$

189 where  $\tilde{\Omega}$  hides polylogarithmic terms in  $T$  and factors depending on  $\eta$  and  $\Delta$ .

190 *Proof sketch.* Let us assume  $K = 2$  in the following, and introduce the main steps of the proof of the  
191 theorem. Details and supporting results can be found in Appendix C, where we directly consider a  
192 general number of arms. Since only arm 1 yields non-zero rewards, we directly have

$$\forall t \geq 1, \theta_{1,t+1} = \theta_{1,t} + \eta(1 - p_{1,t}) \cdot r_t \cdot \mathbb{1}(A_t = 1),$$

193 so we denote by  $\tilde{p}_{n+1}$  the sampling probability of arm 1 after its  $n$  first pulls. The proof consists of  
194 identifying a scenario with linear regret, and lower bounding its probability as a function of  $\eta$ .

195 **Step 1:** Let  $\mathcal{S}$  be the event that  $\tilde{p}_{n+1} \leq \frac{1}{2T}$ , for some fixed value of  $n$ . Then, under  $\mathcal{S}$  the probability  
196 that arm 1 is never pulled again after its  $n$  first selections is larger than  $1/2$ , in which case the regret  
197 is larger than  $\Delta(T - n)$ . It thus holds that  $\mathcal{R}_T \geq 0.5 \cdot \Delta \cdot \mathbb{P}(\mathcal{S}) \cdot (T - n)_+$ .

198 **Step 2:** We lower bound  $\mathbb{P}(\mathcal{S})$  for a well-chosen value of  $n = n_0 + n_1$ , for two integers  $n_0$  and  $n_1$ .  
199 Consider the following scenario: in a preliminary phase, arm 1 collects only  $-1$  rewards from its first  
200  $n_0$  pulls, and in a next phase it collects  $n_1$  rewards with an empirical mean satisfying  $\hat{\mu}_{n_1} \approx -\Delta$ ,  
201 while the number of  $+1$ s received is never more than the number of  $-1$ s throughout this phase. First,  
202 we derive in Lemma 6) a lower bound on the probability of this scenario. Then, we prove (Lemma 7)  
203 that setting  $n_1 = \mathcal{O}(\log(T))$  and  $n_0 = \mathcal{O}(\log(n_1))$  guarantees that this scenario is included in the  
204 event  $\mathcal{S}$ . From a high-level perspective, the preliminary phase only serves to make  $\tilde{p}_{n_0+1}$  small enough  
205 to reduce the impact of the ordering of the rewards in the next phase, and the scaling of the lower  
206 bound (ignoring log terms) comes from the choice of  $n_1$ .

207 Lastly, we emphasize that the result should hold with random sub-optimal arms (further assuming  
208 that they are “lucky enough” throughout the trajectory), but constant rewards simplify the proof.

209 □

210 **Critical regime** We remark that Theorems 1 and 2 do not provide explicit results about the regret  
211 of SGB when  $\eta \approx \Delta$ , that we thus call the *critical regime*. However, by comparing both theorems  
212 and their proofs we conjecture that, on some difficult instances, SGB satisfies  $\mathbb{E}[(1 - p_t)^2] \asymp t^{-\frac{\Delta}{\eta}}$ .  
213 Indeed, after summation this scaling makes the failure regret admit a  $(\Delta - \eta)^{-1}$  upper bound when  
214  $\eta < \Delta$  (as in Thm. 1), and a  $\Omega(T^{1-\frac{\Delta}{\eta}})$  lower bound when  $\eta > \Delta$  (akin to Thm. 2). This suggests a  
215 smooth interpolation between the logarithmic and polynomial regime, maybe with a small range of  
216 learning rates  $\eta \approx \Delta$  for which the **failure regret** could be logarithmic on difficult instances. This is  
217 supported by experiments from Section 4 and Appendix G: we observe a relatively smooth evolution  
218 of performance metrics (regret, percentage of failed runs) with the learning rate. In the experiments,  
219 the critical learning rates, such as  $\eta = \Delta$  when  $K = 2$ , provide good empirical performance.

### 220 3 Results for $K > 2$ arms

221 In this section, we explore the theoretical guarantees of SGB for  $K > 2$ . We start by proving that the  
222 learning rate must decrease with the number of arms in order to guarantee logarithmic regret. Then,  
223 we provide preliminary results for upper bounding the regret of SGB by generalizing the proof of  
224 Theorem 1. We also provide some intuition about why this case is significantly harder than  $K = 2$ ,  
225 and what we believe to be the right critical scaling for  $\eta$ .

#### 226 3.1 Necessary scaling of $\eta$ in $K$ for logarithmic regret

227 In this part, we exhibit a *necessary* condition on the learning rate for logarithmic regret, depending  
228 on the number of arms  $K$ . While we proved Thm. 2 by directly analyzing a difficult instance, on the  
229 contrary, the proof technique of Thm. 3 exploits the efficiency of SGB on an *easy* problem instance,  
230 from which we deduce the result using lower bound arguments. We start by presenting the regret  
231 upper bound leading to this conclusion.

232 **Lemma 1** (Regret upper bound on an easy instance). *Let  $\nu \in \mathcal{F}^K$  be a MAB defined by  $\nu_1 = \delta_0$  and*  
 233  *$\nu_2 = \dots = \nu_K = \delta_{-\Delta}$ , for some  $\Delta > 0$ . Then, for **any** learning rate  $\eta$ , SGB satisfies*

$$\forall \varepsilon \in (0, 1), \mathcal{R}_T^{\text{SGB}} \leq \frac{1 + \log(1 + (K-1)T\eta\Delta)}{(1-\varepsilon)\eta} + \frac{K^2}{\varepsilon} \cdot \left( \Delta + \frac{1}{\eta} \log\left(\frac{K}{\varepsilon}\right) \right).$$

234 *Proof sketch.* We present the full proof in Appendix D.2. We first show that, since rewards are  
 235 deterministic, arm 1 remains the mode of the sampling distribution for all steps  $t$ , and  $p_{k,t}/p_{1,t}$  is  
 236 non-increasing for any sub-optimal arm  $k$ . Hence, we establish that  $p_{1,t} \geq 1 - \varepsilon$  happens *in finite*  
 237 *expected time* for any threshold  $\varepsilon \in (0, 1)$ , which gives the  $\mathcal{O}(\varepsilon^{-1})$  term of the bound. We then prove  
 238 that, from that stage,  $1 - p_{1,t}$  decreases exponentially fast with the **total number of sub-optimal**  
 239 **plays**. This careful decomposition allows us to obtain a logarithmic term that does not involve a  
 240 multiplicative factor of  $K - 1$ . In Appendix D.2 and G.3 we further discuss how this result might be  
 241 tightened by a factor  $\frac{K-1}{K}$ , which we prove formally for  $K = 2$  (Lemma 14).  $\square$

242 **Implication on the consistency of SGB** Lemma 1 suggests that, for a fixed horizon, the regret  
 243 of SGB can be arbitrarily small for large  $\eta$  in some easy bandit instances. As a consequence of the  
 244 well-known asymptotic regret lower bound [36, 37], this must come at a cost on *other instances*. We  
 245 dedicate Appendix D.1 for a thorough presentation of this lower bound (restated in Thm. 6), and the  
 246 technical results that we used to derive the following theorem.

247 **Theorem 3** (Polynomial regret for  $\eta > K^{-1}$ ). *If SGB is tuned with learning rate  $\eta > \eta_K := \frac{1}{2\sqrt{K-1}}$ ,*  
 248 *then there exists a bandit instance  $\nu \in \mathcal{F}^K$  and  $\alpha > 0$  such that  $\mathcal{R}_T^{\text{SGB}}(\nu) = \Omega(T^\alpha)$ .*

249 *Proof.* Choosing  $\varepsilon^{-1} = \sqrt{\log(3+T)}$ , Lemma 1 yields  $\mathcal{R}_T = \eta^{-1} \cdot \log(T) + \mathcal{O}(\sqrt{\log(T)})$  for  
 250 any instance matching the description in the lemma (fixing some  $\Delta > 0$ ). On such instance, the  
 251 asymptotic regret lower bound is  $(K-1) \frac{\Delta \log(T)}{\log(1+\Delta)}$  (see Lemma 11). Hence, if  $\eta > (K-1)^{-1}$ , there  
 252 exists such instance for which the lower bound (Thm. 6) is violated. From Corollary 3, we conclude  
 253 that there must exist another instance with polynomial regret on  $\mathcal{F}^K$ . For  $K = 2$ , we simply replace  
 254 the upper bound of Lemma 1 by the bound of Lemma 14, tighter by a factor 2 on the logarithm.  $\square$

255 **Discussion** First, we refer to Lemma 12 in Appendix D.1 for adapting the proof of Thm. 3 for the  
 256 class of distributions  $\mathcal{F}_\Delta^K$ , for any  $\Delta \in (0, 1)$ , clarifying that the theorem does not contradict Thm. 1.

257 The fact that the learning rate has to be inversely proportional to the number of arms might be  
 258 surprising at first sight. An intuitive explanation is that the update rule of  $\theta_{1,t}$  is agnostic to the  
 259 number of arms: for any step  $t \geq 1$ , the distribution of  $\delta\theta_{1,t}$  conditioned on  $\mathcal{H}_{t-1}$  is the same if arm  
 260 1 faces a single arm ( $K = 2$ ) or a mixture of  $K - 1$  identical arms. Hence, in order to reduce the  
 261 speed of convergence of  $p_{1,t}$ , and thus guarantee sufficient exploration of the  $K - 1$  alternatives, it is  
 262 necessary to make the learning rate decrease with  $K$ . In contrast, standard bandit policies typically  
 263 have a separate exploration mechanism for each arm, determined by their respective observations.

264 Combining Thm. 2 and 3, we establish that logarithmic regret is only achievable for  $\eta \lesssim \Delta \wedge K^{-1}$ .  
 265 This suggests that the critical threshold separating logarithmic from polynomial regret may depend  
 266 on the ratio  $\Delta/K$ . We explore this idea further in Appendix D.3, where we present and motivate two  
 267 conjectures. Conjecture 1, inspired by Theorem 3, posits that regret cannot be too small on an "easy"  
 268 instance. Conjecture 2 considers a specific construction with one slightly sub-optimal arm and many  
 269 very sub-optimal arms:  $\nu_1 = \text{Rad}(\Delta)$ ,  $\nu_2 = \delta_0$ , and  $\nu_3 = \dots = \nu_K = \delta_{-1}$ . Both suggest that the  
 270 critical rate, above which SGB may suffer polynomial regret, is near  $\frac{2\Delta}{K}$  for  $K$ -armed bandits.

### 271 3.2 Tools for upper bounding the regret

272 In this section we propose some tools to derive upper bounds on the regret of SGB for  $K > 2$ . While  
 273 our current results do not lead to a complete regret upper bound in general, we introduce promising  
 274 preliminary results, with full regret bounds in some cases, showing the potential of the techniques  
 275 introduced in this paper for future investigation on this problem.

276 Let us introduce the random variable  $M_T = \sup_{k \in \{2, \dots, K\}} \sup_{t \in [T]} \mathbb{E}[e^{\theta_{k,t}}]$ . Then, our first result of  
 277 this section states that  $\mathbb{E}[\theta_{1,T+1}]$  is **always** logarithmic in  $T$  when  $K > 2$ , as detailed below.

278 **Lemma 2.** For any horizon  $T \geq 1$  and for any learning rate  $\eta$ , parameter  $\theta_{1,T+1}$  of SGB satisfies

$$\mathbb{E}[\theta_{1,T+1}] \leq \log \left( 1 + \left( \eta\Delta + \frac{\eta^2}{2} e^\eta \right) (K-1) \cdot M_T \cdot T \right) \wedge (K-1) \cdot (\log(T) + 4\eta),$$

279 We prove the lemma in Appendix F.2, with distinct proofs for the two bounds. The first one is based  
 280 on Jensen inequality, similarly to the proof of Thm. 1. For the second bound, we first prove that  
 281 the expectation of the *minimum* parameter  $\mathbb{E}[\min_{k \in [K]} \theta_{k,t}]$  cannot be smaller than  $-\log(T)$ . We  
 282 then deduce the bound scaling with  $(K-1) \log(T)$  by using the linear relationship (9) between all  
 283 parameters. The first bound is tighter asymptotically e.g. if  $M_T = \mathcal{O}(T)$ , which we think should  
 284 hold at least for small enough  $\eta$ , but proving it formally requires new techniques. Nonetheless, the  
 285 potentially sub-optimal  $K-1$  factor only appears in the upper bound, and does not translate into a  
 286 supplementary constraint on how to tune SGB to achieve logarithmic regret.

287 We now introduce an upper bound on the failure regret obtained by generalizing the proof of Thm. 1.

288 **Lemma 3.** For any instance  $\nu \in \mathcal{F}_\Delta^K$  and learning rate satisfying  $\eta C_\eta < \Delta$ , SGB satisfies

$$\mathbb{E} \left[ \sum_{t=1}^T (1 - p_{1,t})^2 \right] \leq \frac{K-1}{K \cdot \eta(\Delta - \eta C_\eta)} + \mathbb{E} \left[ \sum_{t=1}^T \frac{\eta H_t + \frac{\eta^2}{2} W_t}{p_{1,t}} \right], \text{ with}$$

289  $H_t = \sum_{k=2}^K p_{k,t}^2 (\mathbb{E}_t[\Delta_{A_t}] - (1 - p_{1,t})\Delta_k)$  and  $W_t = \sum_{k=2}^K p_{k,t}^2 (1 - p_{k,t}) - p_{1,t}(1 - p_{1,t})^2$ .

290 This result, proved in Appendix F.4, matches the upper bound on the failure regret in Thm. 1 for  
 291  $K = 2$ , since  $H_t = W_t = 0$  in this scenario. Unfortunately, upper bounding the additional terms  
 292 depending on  $H_t$  and  $W_t$  is intricate in general. However, these terms can be non-positive under  
 293 favorable scenarios, and are thus not necessarily causing regret. In Appendix F.4.1 we detail some  
 294 properties and intuition about  $H_t$  and  $W_t$ , that can be useful for future works. Intuitively,  $W_t$  reflects  
 295 how uniformly the probability  $1 - p_{1,t}$  is divided among sub-optimal arms, leading to increased  
 296 variance for parameter updates. Moreover,  $H_t > 0$  can occur in a scenario where increasing the  
 297 probability of an arm whose gap is lower than the expected gap of the policy might be preferable to  
 298 increasing  $p_{1,t}$ . Finally, we remark that Lemma 3 does not hint that  $\eta$  should depend on  $K$ , suggesting  
 299 that the scaling found in Thm. 3 is required to further upper bound the newly introduced terms.

300 We finally present a complete regret upper bound when the gaps are identical among all arms, that we  
 301 prove in Appendix E. As expected from previous results, the main difficulty is to upper bound the  
 302 failure regret, although we can exploit the fact that  $H_t = 0$  in the case of identical gaps. The factor  
 303  $K$  in the tuning of the learning rate emerges from the initialization  $p_{1,1} = K^{-1}$ .

304 **Theorem 4** (Logarithmic regret for identical gaps). Let  $\nu \in \mathcal{F}^K$  be a MAB instance satisfying  
 305  $\Delta_2 = \dots = \Delta_K = \Delta$ , for some  $\Delta \in (0, 1)$ . Then, the regret of SGB tuned with a learning rate  $\eta$   
 306 satisfying  $\eta C_\eta < \frac{2\Delta}{K+2}$  is upper bounded as follows,

$$\mathcal{R}_T^{\text{SGB}}(\nu) \leq \frac{2}{\eta} \cdot \mathbb{E}[\theta_{1,T+1}] + \Gamma_\nu \leq \frac{2(K-1)}{\eta} \cdot \log(T) + \Gamma_\nu, \text{ for some constant } \Gamma_\nu > 0.$$

## 307 4 Experiments

308 We now provide empirical support for the theoretical results presented in previous sections, focusing  
 309 on the performance of SGB as a function of its learning rate  $\eta$ . We present additional experiments in  
 310 Appendix G, where we also empirically compare SGB to some standard bandit algorithms.

311 **Experimental Setups** To illustrate Thm. 1 and 2 we first consider a two-armed bandit experiment  
 312 with distributions  $\nu_1 = \text{Rad}(0.1)$  and  $\nu_2 = \text{Rad}(0)$ , on which we test SGB with four different learning  
 313 rates:  $(\eta_i)_{i \in [4]} = \{\frac{\Delta}{2}, \Delta, 2\Delta, 5\Delta\}$ . Among these,  $\eta_1 = \frac{\Delta}{2}$  yields logarithmic regret (Thm. 1), and  
 314  $\eta_2 = \Delta$  is the critical threshold identified in Section 2. Assuming that Thm. 2 is tight, and using  
 315  $\lambda_\Delta \approx \Delta$ , we expect  $\eta_3$  and  $\eta_4$  to suffer polynomial regret of resp. order  $\sqrt{T}$  and  $T^{4/5}$ . For the second  
 316 experiment, we consider  $K = 10$  arms and the instance defined by  $\nu_1 = \text{Rad}(0.1)$ ,  $\nu_2 = \delta_0$  and  
 317  $\nu_3 = \dots = \nu_{10} = \delta_{-1}$ , in order to support Thm. 3, and more precisely the conjecture that the critical  
 318 learning rate is  $\eta = 2\Delta/K$  for  $K$ -armed problems. Thus, we compare the performance of SGB  
 319 with learning rates  $(\eta_i)_{i \in [5]} = \{\frac{\Delta}{K}, \frac{2\Delta}{K} = \frac{\Delta}{5}, \frac{\Delta}{2}, \Delta, 5\Delta\}$ . For each setup, we run  $10^4$  independent  
 320 trajectories of SGB over horizon  $T = 2 \cdot 10^4$ . Our results are displayed in Figures 1 and 2 respectively.

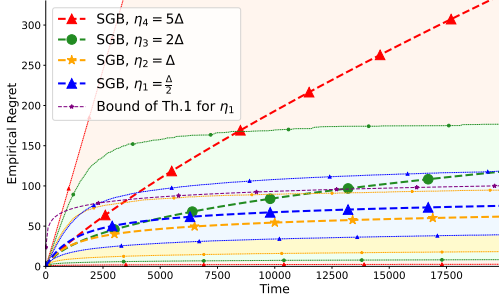

| $T \backslash \eta$ | $\frac{\Delta}{2}$ | $\Delta$ | $2\Delta$ | $5\Delta$ |
|---------------------|--------------------|----------|-----------|-----------|
| $5 \cdot 10^3$      | 0.7                | 2.3      | 7.6       | 19.9      |
| $10^4$              | 0.2                | 1        | 5.4       | 17.6      |
| $2 \cdot 10^4$      | 0.06               | 0.5      | 3.6       | 15.5      |

% of the  $10^4$  runs with  
empirical regret larger than  $\frac{T\Delta}{2}$   
(regret of the uniform policy)

Figure 1:  $K = 2$ , average regret and 10 – 90% percentiles for  $10^4$  independent runs up to  $T = 2 \cdot 10^4$  (Left), and percentage of trajectories with emp. regret larger than  $\frac{T\Delta}{2}$  at several horizons (Right).

**Results** The results of both experiments support the theoretical findings developed in this work. In each setting, only learning rates below the critical threshold  $2\Delta/K$  (specifically,  $\eta_1$  and  $\eta_2$ ) lead to a logarithmic average regret. For the rate just above the critical threshold ( $\eta_3$ ), the additional statistics presented alongside the average regret curves highlight the fragility of this tuning. In particular, the average regret shifts closer to the 90th percentile across runs, indicating a noticeable increase in failed trajectories compared to smaller learning rates. For  $K = 2$ , the table in Fig. 1 confirms this finding.

The figures also remarkably illustrate the regret decomposition of Eq.(7), particularly the right panel of Figure 2, which shows the empirical distributions of regret across trajectories at time  $T$ . These distributions are distinctly *bimodal*. A subset of runs exhibits a *post-convergence* behavior, with regret concentrated around a value proportional to  $\eta^{-1} \log(T)$  (see Eq. (7) and Lemma 2). We highlight this by plotting dotted lines that scale the average regret of SGB tuned with  $\eta_1$ —used as a reference due to its negligible failure rate—by the factor  $\eta_1/\eta_i$  for each  $i \in [5]$ . These reference lines align well with the “success” mode of their respective learning rates. At the same time, the distributions also reveal a *failure mode*, whose mass substantially increases with the learning rate (30% for  $\eta_5$ ). Across all configurations, only a small fraction of trajectories deviate from these two dominant modes.

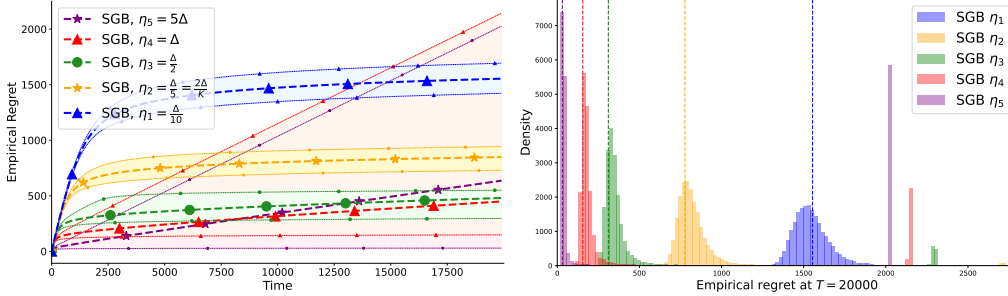

Figure 2:  $K = 10$ , average regret and 10 – 90% percentiles on  $10^4$  independent runs up to horizon  $T = 2 \cdot 10^4$  (Left), and distribution of the empirical regret at time  $T$  (Right).

## 5 Conclusion

This work sheds light on the theoretical properties of SGB, a simple policy gradient algorithm for bandits, whose behavior is governed by a learning rate  $\eta$ . In contrast to much of the existing literature, which largely adopts an optimization perspective, we approach the problem through the lens of regret analysis. For two-armed bandits, we show that knowledge of a lower bound on the sub-optimality gap  $\Delta$  is both necessary and sufficient to achieve logarithmic regret. For general  $K$ -armed settings, our results indicate that the critical learning rate threshold scales as  $2\Delta/K$ , and we provide technical tools and insights that could serve as a foundation for a full regret characterization of SGB in broader contexts. Our theoretical and empirical findings reveal a fundamental trade-off in tuning SGB: while larger learning rates may enhance performance in favorable scenarios, exceeding the critical threshold significantly raises the risk of *failure*—that is, trajectories in which the optimal arm is consistently under-sampled. Further understanding and managing this trade-off is essential for deploying SGB and its variants reliably and effectively, and offers a compelling direction for future research.

## References

- [1] Jincheng Mei, Zixin Zhong, Bo Dai, Alekh Agarwal, Csaba Szepesvári, and Dale Schuurmans. Stochastic gradient succeeds for bandits. In *International Conference on Machine Learning, ICML 2023, 23-29 July 2023, Honolulu, Hawaii, USA*, volume 202 of *Proceedings of Machine Learning Research*. PMLR, 2023.
- [2] Jincheng Mei, Bo Dai, Alekh Agarwal, Sharan Vaswani, Anant Raj, Csaba Szepesvári, and Dale Schuurmans. Small steps no more: Global convergence of stochastic gradient bandits for arbitrary learning rates. In *Advances in Neural Information Processing Systems 38: Annual Conference on Neural Information Processing Systems 2024, NeurIPS 2024, Vancouver, BC, Canada, 2024*.
- [3] Herbert Robbins and Sutton Monro. A stochastic approximation method. *The Annals of Mathematical Statistics*, 22(3):400–407, 1951.
- [4] Ronald J Williams. Simple statistical gradient-following algorithms for connectionist reinforcement learning. *Machine Learning*, 8(3-4):229–256, 1992.
- [5] Richard S. Sutton, David McAllester, Satinder Singh, and Yishay Mansour. Policy gradient methods for reinforcement learning with function approximation. In *Advances in Neural Information Processing Systems*, volume 12, 2000.
- [6] David Silver, Guy Lever, Nicolas Heess, Thomas Degris, Daan Wierstra, and Martin Riedmiller. Deterministic policy gradient algorithms. In *International Conference on Machine Learning*, 2014.
- [7] Timothy P. Lillicrap, Jonathan J. Hunt, Alexander Pritzel, Nicolas Heess, Tom Erez, Yuval Tassa, David Silver, and Daan Wierstra. Continuous control with deep reinforcement learning. In *4th International Conference on Learning Representations, ICLR 2016, San Juan, Puerto Rico, May 2-4, 2016, Conference Track Proceedings*, 2016.
- [8] John Schulman, Sergey Levine, Philipp Moritz, Michael Jordan, and Pieter Abbeel. Trust region policy optimization. In *International Conference on Machine Learning*, 2015.
- [9] John Schulman, Filip Wolski, Prafulla Dhariwal, Alec Radford, and Oleg Klimov. Proximal policy optimization algorithms. *arXiv preprint arXiv:1707.06347*, 2017.
- [10] Tuomas Haarnoja, Aurick Zhou, Pieter Abbeel, and Sergey Levine. Soft actor-critic: Off-policy maximum entropy deep reinforcement learning with a stochastic actor. In *International Conference on Machine Learning*, 2018.
- [11] Richard S. Sutton and Andrew G. Barto. *Reinforcement Learning: An Introduction*. The MIT Press, second edition, 2018.
- [12] Zafarali Ahmed, Nicolas Le Roux, Mohammad Norouzi, and Dale Schuurmans. Understanding the impact of entropy on policy optimization. In *Proceedings of the 36th International Conference on Machine Learning, ICML 2019, 9-15 June 2019, Long Beach, California, USA*, volume 97 of *Proceedings of Machine Learning Research*. PMLR, 2019.
- [13] Jincheng Mei, Chenjun Xiao, Csaba Szepesvári, and Dale Schuurmans. On the global convergence rates of softmax policy gradient methods. In *Proceedings of the 37th International Conference on Machine Learning, ICML 2020, 13-18 July 2020, Virtual Event*, volume 119 of *Proceedings of Machine Learning Research*. PMLR, 2020.
- [14] Jincheng Mei, Chenjun Xiao, Bo Dai, Lihong Li, Csaba Szepesvári, and Dale Schuurmans. Escaping the gravitational pull of softmax. In *Advances in Neural Information Processing Systems 33: Annual Conference on Neural Information Processing Systems 2020, NeurIPS 2020, December 6-12, 2020, virtual*, 2020.
- [15] Gen Li, Yuting Wei, Yuejie Chi, and Yuxin Chen. Softmax policy gradient methods can take exponential time to converge. *Math. Program.*, 201(1), 2023.

- [16] Alekh Agarwal, Sham M. Kakade, Jason D. Lee, and Gaurav Mahajan. On the theory of policy gradient methods: Optimality, approximation, and distribution shift. *J. Mach. Learn. Res.*, 22, 2021.
- [17] Shivam Garg, Samuele Tosatto, Yangchen Pan, Martha White, and Rupam Mahmood. An alternate policy gradient estimator for softmax policies. In *International Conference on Artificial Intelligence and Statistics, AISTATS 2022, 28-30 March 2022, Virtual Event*, volume 151 of *Proceedings of Machine Learning Research*. PMLR, 2022.
- [18] Peter Auer, Nicolo Cesa-Bianchi, and Paul Fischer. Finite-time analysis of the multiarmed bandit problem. *Machine learning*, 47(2):235–256, 2002.
- [19] Shipra Agrawal and Navin Goyal. Analysis of Thompson sampling for the multi-armed bandit problem. In *Proceedings of the 25th Annual Conference on Learning Theory*, 2012.
- [20] Kaiqing Zhang, Alec Koppel, Hao Zhu, and Tamer Basar. Global convergence of policy gradient methods to (almost) locally optimal policies. *SIAM J. Control. Optim.*, 58(6), 2020.
- [21] Yuhao Ding, Junzi Zhang, and Javad Lavaei. Beyond exact gradients: Convergence of stochastic soft-max policy gradient methods with entropy regularization. *CoRR*, abs/2110.10117, 2021.
- [22] Junyu Zhang, Chengzhuo Ni, Zheng Yu, Csaba Szepesvári, and Mengdi Wang. On the convergence and sample efficiency of variance-reduced policy gradient method. In *Advances in Neural Information Processing Systems 34: Annual Conference on Neural Information Processing Systems 2021, NeurIPS 2021, December 6-14, 2021, virtual*, 2021.
- [23] Michael Lu, Matin Aghaei, Anant Raj, and Sharan Vaswani. Towards principled, practical policy gradient for bandits and tabular mdps. *RLJ*, 1, 2024.
- [24] Rui Yuan, Robert M. Gower, and Alessandro Lazaric. A general sample complexity analysis of vanilla policy gradient. In *International Conference on Artificial Intelligence and Statistics, AISTATS 2022, 28-30 March 2022, Virtual Event*, volume 151 of *Proceedings of Machine Learning Research*. PMLR, 2022.
- [25] Simon Weissmann, Sara Klein, Waïss Azizian, and Leif Döring. Almost sure convergence rates of stochastic gradient methods under gradient domination. *CoRR*, abs/2405.13592, 2024.
- [26] Sara Klein, Simon Weissmann, and Leif Döring. Beyond stationarity: Convergence analysis of stochastic softmax policy gradient methods. In *The Twelfth International Conference on Learning Representations, ICLR 2024, Vienna, Austria, May 7-11, 2024*, 2024.
- [27] Sara Klein, Xiangyuan Zhang, Tamer Basar, Simon Weissmann, and Leif Döring. Structure matters: Dynamic policy gradient. *CoRR*, abs/2411.04913, 2024.
- [28] Jincheng Mei, Wesley Chung, Valentin Thomas, Bo Dai, Csaba Szepesvári, and Dale Schuurmans. The role of baselines in policy gradient optimization. In *Advances in Neural Information Processing Systems 35: Annual Conference on Neural Information Processing Systems 2022, NeurIPS 2022, New Orleans, LA, USA, 2022*.
- [29] Neil Walton and Denis Denisov. Regret analysis of a markov policy gradient algorithm for multiarm bandits. *Math. Oper. Res.*, 48(3):1553–1588, August 2023. ISSN 0364-765X.
- [30] Olivier Cappé, Aurélien Garivier, Odalric-Ambrym Maillard, Rémi Munos, and Gilles Stoltz. Kullback-Leibler upper confidence bounds for optimal sequential allocation. *Annals of Statistics*, 41(3):1516–1541, 2013.
- [31] William R Thompson. On the likelihood that one unknown probability exceeds another in view of the evidence of two samples. *Biometrika*, 25(3/4):285–294, 1933.
- [32] N. Korda, E. Kaufmann, and R. Munos. Thompson sampling for one-dimensional exponential family bandits. In *Advances in Neural Information Processing Systems*, 2013.
- [33] Stéphane Boucheron, Gabor Lugosi, and Pascal Massart. *Concentration inequalities : a non asymptotic theory of independence*. Oxford University Press, 2013.

- [34] Yanwu Yang and Panyu Zhai. Click-through rate prediction in online advertising: A literature review. *Inf. Process. Manag.*, 59(2):102853, 2022.
- [35] Anirban Bhattacharjee, Sushant Vijayan, and Sandeep Juneja. Best arm identification in rare events. In *Proceedings of the Thirty-Ninth Conference on Uncertainty in Artificial Intelligence*, volume 216 of *Proceedings of Machine Learning Research*, pages 163–172. PMLR, 31 Jul–04 Aug 2023.
- [36] Tze Leung Lai and Herbert Robbins. Asymptotically efficient adaptive allocation rules. *Advances in applied mathematics*, 6(1):4–22, 1985.
- [37] Apostolos N Burnetas and Michael N Katehakis. Optimal adaptive policies for sequential allocation problems. *Advances in Applied Mathematics*, 17(2):122–142, 1996.
- [38] Tor Lattimore and Csaba Szepesvári. *Bandit algorithms*. Cambridge University Press, 2020.
- [39] Aleksandrs Slivkins. Introduction to multi-armed bandits. *Found. Trends Mach. Learn.*, 12(1-2), 2019.
- [40] Rajeev Agrawal. Sample mean based index policies with  $o(\log n)$  regret for the multi-armed bandit problem. *Advances in Applied Probability*, pages 1054–1078, 1995.
- [41] Olivier Chapelle and Lihong Li. An empirical evaluation of thompson sampling. In J. Shawe-Taylor, R. Zemel, P. Bartlett, F. Pereira, and K.Q. Weinberger, editors, *Advances in Neural Information Processing Systems*, volume 24. Curran Associates, Inc., 2011.
- [42] Emilie Kaufmann, Nathaniel Korda, and Rémi Munos. Thompson sampling: An asymptotically optimal finite-time analysis. In *Algorithmic Learning Theory - 23rd International Conference, ALT 2012*, 2012.
- [43] Junya Honda and Akimichi Takemura. Optimality of thompson sampling for gaussian bandits depends on priors. In *Proceedings of the Seventeenth International Conference on Artificial Intelligence and Statistics, AISTATS 2014, Reykjavik, Iceland, April 22-25, 2014*, 2014.
- [44] Charles Riou and Junya Honda. Bandit algorithms based on Thompson sampling for bounded reward distributions. In *Algorithmic Learning Theory*, pages 777–826. PMLR, 2020.
- [45] Junya Honda and Akimichi Takemura. An asymptotically optimal policy for finite support models in the multiarmed bandit problem. *Mach. Learn.*, 2011.
- [46] Junya Honda and Akimichi Takemura. Non-asymptotic analysis of a new bandit algorithm for semi-bounded rewards. *J. Mach. Learn. Res.*, 16:3721–3756, 2015.
- [47] Craig Boutilier, Chih-wei Hsu, Branislav Kveton, Martin Mladenov, Csaba Szepesvari, and Manzil Zaheer. Differentiable meta-learning of bandit policies. In H. Larochelle, M. Ranzato, R. Hadsell, M.F. Balcan, and H. Lin, editors, *Advances in Neural Information Processing Systems*, volume 33, pages 2122–2134. Curran Associates, Inc., 2020.
- [48] Jie Bian and Kwang-Sung Jun. Maillard sampling: Boltzmann exploration done optimally. In *Proceedings of the 25th International Conference on Artificial Intelligence and Statistics, AISTATS 2022*, 2022.
- [49] Hao Qin, Kwang-Sung Jun, and Chicheng Zhang. Kullback-leibler maillard sampling for multi-armed bandits with bounded rewards. In *Advances in Neural Information Processing Systems 37: Annual Conference on Neural Information Processing Systems 2023, NeurIPS 2023*, 2023.
- [50] Branislav Kveton, Martin Mladenov, Chih-Wei Hsu, Manzil Zaheer, Csaba Szepesvari, and Craig Boutilier. Meta-learning bandit policies by gradient ascent, 2021.
- [51] Dorian Baudry, Kazuya Suzuki, and Junya Honda. A general recipe for the analysis of randomized multi-armed bandit algorithms. *CoRR*, abs/2303.06058, 2023.

- 488 [52] Branislav Kveton, Csaba Szepesvári, Mohammad Ghavamzadeh, and Craig Boutilier. Perturbed-  
489 history exploration in stochastic multi-armed bandits. In *Proceedings of the Twenty-Eighth*  
490 *International Joint Conference on Artificial Intelligence, IJCAI 2019*, 2019.
- 491 [53] Branislav Kveton, Csaba Szepesvari, Sharan Vaswani, Zheng Wen, Tor Lattimore, and Moham-  
492 mad Ghavamzadeh. Garbage in, reward out: Bootstrapping exploration in multi-armed bandits.  
493 In *International Conference on Machine Learning*, pages 3601–3610. PMLR, 2019.
- 494 [54] Akram Baransi, Odalric-Ambrym Maillard, and Shie Mannor. Sub-sampling for multi-armed  
495 bandits. In *Proceedings of the European Conference on Machine Learning*, page 13, 2014.
- 496 [55] Hock Peng Chan. The multi-armed bandit problem: An efficient nonparametric solution. *The*  
497 *Annals of Statistics*, 48(1):346–373, 2020.
- 498 [56] Dorian Baudry, Emilie Kaufmann, and Odalric-Ambrym Maillard. Sub-sampling for efficient  
499 non-parametric bandit exploration. In *Advances in Neural Information Processing Systems*,  
500 2020.
- 501 [57] Dorian Baudry, Yoan Russac, and Olivier Cappé. On Limited-Memory Subsampling Strategies  
502 for Bandits. In *ICML 2021- International Conference on Machine Learning*, Vienna / Virtual,  
503 Austria, July 2021.
- 504 [58] Dorian Baudry, Patrick Saux, and Odalric-Ambrym Maillard. From optimality to robustness:  
505 Adaptive re-sampling strategies in stochastic bandits. In *Advances in Neural Information*  
506 *Processing Systems*, 2021.
- 507 [59] Daniil Tiapkin, Denis Belomestny, Eric Moulines, Alexey Naumov, Sergey Samsonov, Yunhao  
508 Tang, Michal Valko, and Pierre Ménard. From dirichlet to rubin: Optimistic exploration in RL  
509 without bonuses. In *International Conference on Machine Learning, ICML 2022, 17-23 July*  
510 *2022, Baltimore, Maryland, USA*, 2022.
- 511 [60] Lin Fan and Peter W. Glynn. The fragility of optimized bandit algorithms, 2024.
- 512 [61] Joseph Bertrand. Solution d’un probleme. *CR Acad. Sci. Paris*, 105(1887):369, 1887.
- 513 [62] Marc Renault. Lost (and found) in translation: André’s actual method and its application to  
514 the generalized ballot problem. *The American Mathematical Monthly*, 115(4):358–363, 2008.  
515 ISSN 00029890, 19300972.
- 516 [63] Herbert Robbins. A remark on stirling’s formula. *The American mathematical monthly*, 62(1):  
517 26–29, 1955.
- 518 [64] Emilie Kaufmann. *Analysis of bayesian and frequentist strategies for sequential resource*  
519 *allocation. (Analyse de stratégies bayésiennes et fréquentistes pour l’allocation séquentielle de*  
520 *ressources)*. PhD thesis, Télécom ParisTech, France, 2014.
- 521 [65] Sébastien Bubeck, Vianney Perchet, and Philippe Rigollet. Bounded regret in stochastic multi-  
522 armed bandits. In Shai Shalev-Shwartz and Ingo Steinwart, editors, *Proceedings of the 26th*  
523 *Annual Conference on Learning Theory*, volume 30 of *Proceedings of Machine Learning*  
524 *Research*, Princeton, NJ, USA, 2013. PMLR.
- 525 [66] Dorian Baudry, Fabien Pesquerel, Rémy Degenne, and Odalric-Ambrym Maillard. Fast asymp-  
526 totically optimal algorithms for non-parametric stochastic bandits. In *Advances in Neural*  
527 *Information Processing Systems*, volume 36, 2023.

## NeurIPS Paper Checklist

### 1. Claims

Question: Do the main claims made in the abstract and introduction accurately reflect the paper's contributions and scope?

Answer: [\[Yes\]](#)

Justification: The scope of the paper is clearly stated in Section 1. The contributions are clearly summarized in Section 1.3.

Guidelines:

- The answer NA means that the abstract and introduction do not include the claims made in the paper.
- The abstract and/or introduction should clearly state the claims made, including the contributions made in the paper and important assumptions and limitations. A No or NA answer to this question will not be perceived well by the reviewers.
- The claims made should match theoretical and experimental results, and reflect how much the results can be expected to generalize to other settings.
- It is fine to include aspirational goals as motivation as long as it is clear that these goals are not attained by the paper.

### 2. Limitations

Question: Does the paper discuss the limitations of the work performed by the authors?

Answer: [\[Yes\]](#)

Justification: The scope of our analysis is well-detailed in Section 1.3, where we precisely discuss the type of guarantees that we were able to achieve with our analysis, and what we leave for future works.

Guidelines:

- The answer NA means that the paper has no limitation while the answer No means that the paper has limitations, but those are not discussed in the paper.
- The authors are encouraged to create a separate "Limitations" section in their paper.
- The paper should point out any strong assumptions and how robust the results are to violations of these assumptions (e.g., independence assumptions, noiseless settings, model well-specification, asymptotic approximations only holding locally). The authors should reflect on how these assumptions might be violated in practice and what the implications would be.
- The authors should reflect on the scope of the claims made, e.g., if the approach was only tested on a few datasets or with a few runs. In general, empirical results often depend on implicit assumptions, which should be articulated.
- The authors should reflect on the factors that influence the performance of the approach. For example, a facial recognition algorithm may perform poorly when image resolution is low or images are taken in low lighting. Or a speech-to-text system might not be used reliably to provide closed captions for online lectures because it fails to handle technical jargon.
- The authors should discuss the computational efficiency of the proposed algorithms and how they scale with dataset size.
- If applicable, the authors should discuss possible limitations of their approach to address problems of privacy and fairness.
- While the authors might fear that complete honesty about limitations might be used by reviewers as grounds for rejection, a worse outcome might be that reviewers discover limitations that aren't acknowledged in the paper. The authors should use their best judgment and recognize that individual actions in favor of transparency play an important role in developing norms that preserve the integrity of the community. Reviewers will be specifically instructed to not penalize honesty concerning limitations.

### 3. Theory assumptions and proofs

Question: For each theoretical result, does the paper provide the full set of assumptions and a complete (and correct) proof?

Answer: [\[Yes\]](#)

Justification: We present detailed proof of Theorem 1 in the main paper, and for the other results we present a proof sketch and detail the proofs in dedicated appendices, that are all referenced in the main paper.

Guidelines:

- The answer NA means that the paper does not include theoretical results.
- All the theorems, formulas, and proofs in the paper should be numbered and cross-referenced.
- All assumptions should be clearly stated or referenced in the statement of any theorems.
- The proofs can either appear in the main paper or the supplemental material, but if they appear in the supplemental material, the authors are encouraged to provide a short proof sketch to provide intuition.
- Inversely, any informal proof provided in the core of the paper should be complemented by formal proofs provided in appendix or supplemental material.
- Theorems and Lemmas that the proof relies upon should be properly referenced.

#### 4. Experimental result reproducibility

Question: Does the paper fully disclose all the information needed to reproduce the main experimental results of the paper to the extent that it affects the main claims and/or conclusions of the paper (regardless of whether the code and data are provided or not)?

Answer: [\[Yes\]](#)

Justification: we will make our code available with the paper at the time of publication.

Guidelines:

- The answer NA means that the paper does not include experiments.
- If the paper includes experiments, a No answer to this question will not be perceived well by the reviewers: Making the paper reproducible is important, regardless of whether the code and data are provided or not.
- If the contribution is a dataset and/or model, the authors should describe the steps taken to make their results reproducible or verifiable.
- Depending on the contribution, reproducibility can be accomplished in various ways. For example, if the contribution is a novel architecture, describing the architecture fully might suffice, or if the contribution is a specific model and empirical evaluation, it may be necessary to either make it possible for others to replicate the model with the same dataset, or provide access to the model. In general, releasing code and data is often one good way to accomplish this, but reproducibility can also be provided via detailed instructions for how to replicate the results, access to a hosted model (e.g., in the case of a large language model), releasing of a model checkpoint, or other means that are appropriate to the research performed.
- While NeurIPS does not require releasing code, the conference does require all submissions to provide some reasonable avenue for reproducibility, which may depend on the nature of the contribution. For example
  - (a) If the contribution is primarily a new algorithm, the paper should make it clear how to reproduce that algorithm.
  - (b) If the contribution is primarily a new model architecture, the paper should describe the architecture clearly and fully.
  - (c) If the contribution is a new model (e.g., a large language model), then there should either be a way to access this model for reproducing the results or a way to reproduce the model (e.g., with an open-source dataset or instructions for how to construct the dataset).
  - (d) We recognize that reproducibility may be tricky in some cases, in which case authors are welcome to describe the particular way they provide for reproducibility. In the case of closed-source models, it may be that access to the model is limited in some way (e.g., to registered users), but it should be possible for other researchers to have some path to reproducing or verifying the results.

#### 5. Open access to data and code

Question: Does the paper provide open access to the data and code, with sufficient instructions to faithfully reproduce the main experimental results, as described in supplemental material?

Answer: [Yes]

Justification: The pseudo-code is provided, and the main algorithm is very simple to implement. Code will be provided with the paper.

Guidelines:

- The answer NA means that paper does not include experiments requiring code.
- Please see the NeurIPS code and data submission guidelines (<https://nips.cc/public/guides/CodeSubmissionPolicy>) for more details.
- While we encourage the release of code and data, we understand that this might not be possible, so “No” is an acceptable answer. Papers cannot be rejected simply for not including code, unless this is central to the contribution (e.g., for a new open-source benchmark).
- The instructions should contain the exact command and environment needed to run to reproduce the results. See the NeurIPS code and data submission guidelines (<https://nips.cc/public/guides/CodeSubmissionPolicy>) for more details.
- The authors should provide instructions on data access and preparation, including how to access the raw data, preprocessed data, intermediate data, and generated data, etc.
- The authors should provide scripts to reproduce all experimental results for the new proposed method and baselines. If only a subset of experiments are reproducible, they should state which ones are omitted from the script and why.
- At submission time, to preserve anonymity, the authors should release anonymized versions (if applicable).
- Providing as much information as possible in supplemental material (appended to the paper) is recommended, but including URLs to data and code is permitted.

## 6. Experimental setting/details

Question: Does the paper specify all the training and test details (e.g., data splits, hyperparameters, how they were chosen, type of optimizer, etc.) necessary to understand the results?

Answer: [Yes]

Justification: We carefully detailed the choice of parameters in each setup, since this is precisely the focus of the theoretical results of the paper.

Guidelines:

- The answer NA means that the paper does not include experiments.
- The experimental setting should be presented in the core of the paper to a level of detail that is necessary to appreciate the results and make sense of them.
- The full details can be provided either with the code, in appendix, or as supplemental material.

## 7. Experiment statistical significance

Question: Does the paper report error bars suitably and correctly defined or other appropriate information about the statistical significance of the experiments?

Answer: [Yes]

Justification: we mainly report regret curves on a fixed number of independent runs. For each experiment, this number is sufficiently large so that the average curves are smooth, and we reported 10 – 90% quantiles, to compare algorithms more precisely.

Guidelines:

- The answer NA means that the paper does not include experiments.
- The authors should answer "Yes" if the results are accompanied by error bars, confidence intervals, or statistical significance tests, at least for the experiments that support the main claims of the paper.

- The factors of variability that the error bars are capturing should be clearly stated (for example, train/test split, initialization, random drawing of some parameter, or overall run with given experimental conditions).
- The method for calculating the error bars should be explained (closed form formula, call to a library function, bootstrap, etc.)
- The assumptions made should be given (e.g., Normally distributed errors).
- It should be clear whether the error bar is the standard deviation or the standard error of the mean.
- It is OK to report 1-sigma error bars, but one should state it. The authors should preferably report a 2-sigma error bar than state that they have a 96% CI, if the hypothesis of Normality of errors is not verified.
- For asymmetric distributions, the authors should be careful not to show in tables or figures symmetric error bars that would yield results that are out of range (e.g. negative error rates).
- If error bars are reported in tables or plots, The authors should explain in the text how they were calculated and reference the corresponding figures or tables in the text.

## 8. Experiments compute resources

Question: For each experiment, does the paper provide sufficient information on the computer resources (type of compute workers, memory, time of execution) needed to reproduce the experiments?

Answer: [Yes]

Justification: the experiments can be reproduced on a standard personal laptop. For the time horizons considered in the paper, each individual run is very fast (few seconds), and the execution time is purely proportional to the number of runs, so the results can be reproduced very fast on a smaller scale.

Guidelines:

- The answer NA means that the paper does not include experiments.
- The paper should indicate the type of compute workers CPU or GPU, internal cluster, or cloud provider, including relevant memory and storage.
- The paper should provide the amount of compute required for each of the individual experimental runs as well as estimate the total compute.
- The paper should disclose whether the full research project required more compute than the experiments reported in the paper (e.g., preliminary or failed experiments that didn't make it into the paper).

## 9. Code of ethics

Question: Does the research conducted in the paper conform, in every respect, with the NeurIPS Code of Ethics <https://neurips.cc/public/EthicsGuidelines>?

Answer: [Yes]

Justification: our work is theoretical and does not have direct ethical implications.

Guidelines:

- The answer NA means that the authors have not reviewed the NeurIPS Code of Ethics.
- If the authors answer No, they should explain the special circumstances that require a deviation from the Code of Ethics.
- The authors should make sure to preserve anonymity (e.g., if there is a special consideration due to laws or regulations in their jurisdiction).

## 10. Broader impacts

Question: Does the paper discuss both potential positive societal impacts and negative societal impacts of the work performed?

Answer: [Yes]

Justification: we discuss the impact that the work can have on the understanding of an approach at the foundation of the field of reinforcement learning, but do not discuss the impact of the field itself on society, which is arguably outside of the scope of a work of theoretical nature.

Guidelines:

- The answer NA means that there is no societal impact of the work performed.
- If the authors answer NA or No, they should explain why their work has no societal impact or why the paper does not address societal impact.
- Examples of negative societal impacts include potential malicious or unintended uses (e.g., disinformation, generating fake profiles, surveillance), fairness considerations (e.g., deployment of technologies that could make decisions that unfairly impact specific groups), privacy considerations, and security considerations.
- The conference expects that many papers will be foundational research and not tied to particular applications, let alone deployments. However, if there is a direct path to any negative applications, the authors should point it out. For example, it is legitimate to point out that an improvement in the quality of generative models could be used to generate deepfakes for disinformation. On the other hand, it is not needed to point out that a generic algorithm for optimizing neural networks could enable people to train models that generate Deepfakes faster.
- The authors should consider possible harms that could arise when the technology is being used as intended and functioning correctly, harms that could arise when the technology is being used as intended but gives incorrect results, and harms following from (intentional or unintentional) misuse of the technology.
- If there are negative societal impacts, the authors could also discuss possible mitigation strategies (e.g., gated release of models, providing defenses in addition to attacks, mechanisms for monitoring misuse, mechanisms to monitor how a system learns from feedback over time, improving the efficiency and accessibility of ML).

## 11. Safeguards

Question: Does the paper describe safeguards that have been put in place for responsible release of data or models that have a high risk for misuse (e.g., pretrained language models, image generators, or scraped datasets)?

Answer: [NA]

Justification: Experiments are performed on synthetic data.

Guidelines:

- The answer NA means that the paper poses no such risks.
- Released models that have a high risk for misuse or dual-use should be released with necessary safeguards to allow for controlled use of the model, for example by requiring that users adhere to usage guidelines or restrictions to access the model or implementing safety filters.
- Datasets that have been scraped from the Internet could pose safety risks. The authors should describe how they avoided releasing unsafe images.
- We recognize that providing effective safeguards is challenging, and many papers do not require this, but we encourage authors to take this into account and make a best faith effort.

## 12. Licenses for existing assets

Question: Are the creators or original owners of assets (e.g., code, data, models), used in the paper, properly credited and are the license and terms of use explicitly mentioned and properly respected?

Answer: [NA]

Justification: Experiments are performed on synthetic data.

Guidelines:

- The answer NA means that the paper does not use existing assets.
- The authors should cite the original paper that produced the code package or dataset.
- The authors should state which version of the asset is used and, if possible, include a URL.
- The name of the license (e.g., CC-BY 4.0) should be included for each asset.

- For scraped data from a particular source (e.g., website), the copyright and terms of service of that source should be provided.
- If assets are released, the license, copyright information, and terms of use in the package should be provided. For popular datasets, [paperswithcode.com/datasets](https://paperswithcode.com/datasets) has curated licenses for some datasets. Their licensing guide can help determine the license of a dataset.
- For existing datasets that are re-packaged, both the original license and the license of the derived asset (if it has changed) should be provided.
- If this information is not available online, the authors are encouraged to reach out to the asset's creators.

### 13. New assets

Question: Are new assets introduced in the paper well documented and is the documentation provided alongside the assets?

Answer: [NA]

Justification: Experiments are performed on synthetic data.

Guidelines:

- The answer NA means that the paper does not release new assets.
- Researchers should communicate the details of the dataset/code/model as part of their submissions via structured templates. This includes details about training, license, limitations, etc.
- The paper should discuss whether and how consent was obtained from people whose asset is used.
- At submission time, remember to anonymize your assets (if applicable). You can either create an anonymized URL or include an anonymized zip file.

### 14. Crowdsourcing and research with human subjects

Question: For crowdsourcing experiments and research with human subjects, does the paper include the full text of instructions given to participants and screenshots, if applicable, as well as details about compensation (if any)?

Answer: [NA]

Justification: No experiment involved human participants.

Guidelines:

- The answer NA means that the paper does not involve crowdsourcing nor research with human subjects.
- Including this information in the supplemental material is fine, but if the main contribution of the paper involves human subjects, then as much detail as possible should be included in the main paper.
- According to the NeurIPS Code of Ethics, workers involved in data collection, curation, or other labor should be paid at least the minimum wage in the country of the data collector.

### 15. Institutional review board (IRB) approvals or equivalent for research with human subjects

Question: Does the paper describe potential risks incurred by study participants, whether such risks were disclosed to the subjects, and whether Institutional Review Board (IRB) approvals (or an equivalent approval/review based on the requirements of your country or institution) were obtained?

Answer: [NA]

Justification: No experiment involved human participants.

Guidelines:

- The answer NA means that the paper does not involve crowdsourcing nor research with human subjects.

- 841 • Depending on the country in which research is conducted, IRB approval (or equivalent)  
842 may be required for any human subjects research. If you obtained IRB approval, you  
843 should clearly state this in the paper.
- 844 • We recognize that the procedures for this may vary significantly between institutions  
845 and locations, and we expect authors to adhere to the NeurIPS Code of Ethics and the  
846 guidelines for their institution.
- 847 • For initial submissions, do not include any information that would break anonymity (if  
848 applicable), such as the institution conducting the review.

#### 849 16. Declaration of LLM usage

850 Question: Does the paper describe the usage of LLMs if it is an important, original, or  
851 non-standard component of the core methods in this research? Note that if the LLM is used  
852 only for writing, editing, or formatting purposes and does not impact the core methodology,  
853 scientific rigorousness, or originality of the research, declaration is not required.

854 Answer: [NA]

855 Justification: The core method development in this research does not involve LLMs as any  
856 important, original, or non-standard components. LLMs were primarily used for minor  
857 rephrasing and syntax checks.

858 Guidelines:

- 859 • The answer NA means that the core method development in this research does not  
860 involve LLMs as any important, original, or non-standard components.
- 861 • Please refer to our LLM policy (<https://neurips.cc/Conferences/2025/LLM>)  
862 for what should or should not be described.

## A Supplementary material for Section 1

### A.1 Pseudo-code of SGB

We detail below the pseudo-code of SGB for a constant learning rate  $\eta$ . This implementation only needs a slight modification to consider a time-varying learning rate, as discussed in Section 2: an input sequence  $(\eta_t)_{t \geq 1}$  should be provided, and  $\eta$  should be replaced by  $\eta_t$  in the parameter update.

---

#### Algorithm 1 Stochastic Gradient Bandit (SGB)

---

**Input:** Learning rate  $\eta > 0$   
Set  $(\theta_{k,1})_{k \in [K]} = (0)_{k \in [K]}$ ; ▷ Uniform initialization  
**for**  $t \geq 1$  **do**  
    For  $k \in [K]$ : set  $p_{k,t} = \frac{e^{\theta_{k,t}}}{\sum_{j=1}^K e^{\theta_{j,t}}}$ ; ▷ Compute the sampling probabilities  
    Pull an arm  $A_t \sim p_t := (p_{k,t})_{k \in [K]}$ , collect reward  $r_t$ ; ▷ Sample arm, collect reward  
    **for**  $k \in [K]$  **do**  
        Set  $\theta_{k,t+1} = \theta_{k,t} + \eta r_t \cdot \{(1 - p_{k,t})\mathbb{1}(A_t = k) - p_{k,t}\mathbb{1}(A_t \neq k)\}$ ; ▷ Parameter update

---

### A.2 Some elementary properties of SGB

To enhance clarity, we recall that at time step  $t \geq 1$ , the sampling probabilities of all arms for SGB are given by the softmax transform of some parameters

$$(\theta_{k,t})_{k \in [K]} \in \mathbb{R}^K, \forall k \in [K]: \quad p_{k,t} \propto \exp(\theta_{k,t}),$$

and that for a learning rate  $\eta$ , the parameter are updated as follows,

$$\forall t \geq 1: \theta_{k,t+1} = \theta_{k,t} + \eta \cdot \delta\theta_{k,t}, \text{ with } \delta\theta_{k,t} := (1 - p_{k,t}) \cdot r_t \cdot \mathbb{1}(A_t = k) - p_{k,t} \cdot r_t \cdot \mathbb{1}(A_t \neq k).$$

We present some properties that are particularly useful for our analysis.

**The parameters are linearly dependent** From (4), we can verify that

$$\sum_{k=1}^K \delta\theta_{k,t} = r_t \cdot \left( (1 - p_{A_t}) - \sum_{j \neq A_t} p_{j,t} \right) = 0,$$

and as a consequence we obtain the following relation

$$\forall t \geq 1, \sum_{k=1}^K \delta\theta_{k,t} = 0 \implies \forall t \geq 1, \sum_{k=1}^K \theta_{k,t} = 0. \quad (9)$$

This equation shows that the growth of the parameter of the best arm  $\theta_{1,t}$  is bound to how much the parameters of the sub-optimal arm can be negative, which is a crucial ingredient in the proof of Lemma 2. Furthermore, for  $K = 2$  it holds that  $\theta_{1,t} = -\theta_{2,t}$ , which simplifies the expression of the sampling probability. For instance, for the sub-optimal arm 2 it holds that

$$\text{If } K = 2: \forall t \geq 1, \quad p_{2,t} = \frac{e^{-\theta_{1,t}}}{e^{-\theta_{1,t}} + e^{\theta_{1,t}}} = \frac{e^{-2\theta_{1,t}}}{1 + e^{-2\theta_{1,t}}} \leq e^{-2\theta_{1,t}}. \quad (10)$$

In the same setting this relation furthermore leads to

$$\frac{p_{1,t}}{1 - p_{1,t}} = \frac{p_{1,t}}{p_{2,t}} = e^{2\theta_{1,t}}. \quad (11)$$

**The variance of updates scales with the expectation** Again starting from (4), we analyze the squared variation of the parameters. For all arms  $k \in [K]$ , it holds that

$$(\delta\theta_{k,t})^2 = r_t^2 \cdot ((1 - p_{k,t})^2 \mathbb{1}(A_t = k) + p_{k,t}^2 \mathbb{1}(A_t \neq k)),$$

using that  $\mathbb{1}(A_t = \cdot)^2 = \mathbb{1}(A_t = \cdot)$  and that  $\mathbb{1}(A_t = k)\mathbb{1}(A_t \neq k) = 0$ . For all  $k \in [K]$ , we now introduce  $s_k^2 = \mathbb{E}[r_t^2 | A_t = k]$ , and define  $s^2 = \max_{j \in [K]} s_j^2$ . We then obtain that

$$\mathbb{E}_t [(\delta\theta_{k,t})^2] \leq s_k^2 \cdot p_{k,t}(1 - p_{k,t})^2 + p_{k,t}^2 \cdot \sum_{j \neq k} s_j^2 \cdot p_{j,t},$$

that we can upper bound as follows,

$$\mathbb{E}_t [(\delta\theta_{k,t})^2] \leq s^2 \cdot (p_{k,t}(1 - p_{k,t})^2 + p_{k,t}^2(1 - p_{k,t})) = s^2 \cdot p_{k,t}(1 - p_{k,t}). \quad (12)$$

Again, this property is essential for our analysis. For instance, it implies that

$$\mathbb{E}_t[\delta\theta_{1,t}] \geq \Delta \cdot p_{1,t}(1 - p_{1,t}) \geq \frac{\Delta}{s^2} \cdot \mathbb{E}_t[(\delta\theta_{1,t})^2].$$

**Iterative formula for the sampling probabilities** Lastly, inspired by standard proofs in bandits (see Chapter 11 in [38]), we can express the following recursion on the sampling probabilities, which we use in the proof of all the regret upper bounds presented in this paper,

$$\forall k \in [K], t \geq 1 : \quad p_{k,t+1} = \frac{e^{\theta_{k,t+1}}}{\sum_{j=1}^K e^{\theta_{j,t+1}}} = p_{k,t} \cdot \frac{e^{\eta\delta\theta_{k,t}}}{\sum_{j=1}^K p_{j,t} \cdot e^{\eta\delta\theta_{j,t}}}, \quad (13)$$

which is direct using that  $\forall j \in [K], \theta_{j,t+1} = \theta_{j,t} + \eta \cdot \delta\theta_{j,t}$ , and by dividing both the numerator and denominator by  $\sum_{j=1}^K e^{\theta_{j,t}}$ .

### A.3 Detailed literature review on Multi-Arm Bandits

The multi-armed bandit (MAB) problem has inspired a vast body of research, with many algorithms proposed to balance exploration and exploitation. In this section, we introduce some of the most standard frameworks developed in the literature. In particular, we focus on algorithms proposed to optimize *problem-dependent* regret bounds in *stochastic bandits*, where rewards are drawn independently at random from fixed distributions, since this is the setting considered in this paper. We refer to [38, 39] for comprehensive surveys and broader discussions, including (but not limited to) adversarial bandits, problem-independent bounds, and Bayesian regret bounds in stochastic bandits.

The classical *optimism in the face of uncertainty* principle underlies the popular UCB family of algorithms. The original UCB1 policy [40, 18] achieves logarithmic regret under bounded or sub-Gaussian rewards. Later, the KL-UCB framework [30] was proposed, and proved to yield asymptotically optimal policies for various families of distribution (e.g. bounded distributions and single-parameter exponential families), in the sense that its regret upper bounds match the asymptotic lower bound of Lai and Robbins [36] (see Appendix D.1 for details). These algorithms rely on carefully constructed confidence bounds, involving the information-theoretic  $\mathcal{K}_{\text{inf}}$  divergence (formally defined in Theorem 6), and thus better exploit the statistical properties of distribution classes than simpler UCB variants.

A second major class of policies is *Thompson Sampling* (TS), which dates back to Thompson [31] and has enjoyed renewed popularity since the empirical study of Chapelle and Li [41]. Regarding frequentist analyses, its theoretical foundations were first rigorously established for Bernoulli rewards [19, 42], and further extended to Gaussian [43], single-parametric exponential families [32], and non-parametric bounded distributions [44]. TS is inherently Bayesian, using posterior samples of arm parameters to guide exploration. In all of these settings, TS has been proved to achieve asymptotic optimality under an appropriate choice of prior distribution. For instance, for Bernoulli rewards a uniform prior and Beta posterior yields such guarantees.

A third family, *Minimum Empirical Divergence* (MED) and its deterministic counterpart IMED aim to directly minimize regret by exploiting empirical divergence estimates [45, 46], often inspired by the  $\mathcal{K}_{\text{inf}}$  quantity like KL-UCB approaches, but do not rely on confidence bounds in the algorithm designs. Recently, this approach has been rediscovered under the name *SoftElim* [47] or *Maillard Sampling* (MS) [48, 49], and shown to perform optimally under general sub-Gaussian and bounded settings. Interestingly, [50] have analyzed MED through a policy-gradient lens in contextual extensions. A recent work [51] proposes a unified problem-dependent analysis of MED for generic distribution classes, and establishes a strong connection between MED and (a variant of) Thompson Sampling

924 using non-informative prior, showing that the sampling probabilities of sub-optimal arms under the  
 925 two policies decrease at the same rate asymptotically.

926 Beyond these three canonical families, a number of works have explored nonparametric randomized  
 927 strategies. These include bootstrapping-based methods [52, 53], sub-sampling algorithms [54–57],  
 928 and variants of the nonparametric TS algorithm [44, 58, 59], which connects to the Bayesian bootstrap  
 929 [59]. While SGB could be perceived as fitting into this line of randomized, data-driven policies, these  
 930 approaches rely on fundamentally different principles. Indeed, the core ingredients of SGB are gradient  
 931 ascent and stochastic approximation [3], while these approaches exploit the properties of sample  
 932 statistics which, in particular, requires storing the entire history of observed rewards.

933 Hence, it is clear that the SGB policy stands apart from the classical design principles that shape the  
 934 landscape of bandit algorithms with optimal problem-dependent regret guarantees. In the following  
 935 we elaborate on why this implies that the analysis of SGB must depart from standard techniques  
 936 derived in previous bandit analyses. Nonetheless, we then detail how familiarity with these standard  
 937 approaches still guided our investigation of the theoretical properties of SGB .

938 **Key differences between SGB and standard policies** Fix a generic time step  $t$ . It is clear from (4)  
 939 that the sampling probabilities of SGB depend in a complex, nonlinear way on the entire sequence of  
 940 past rewards, across all arms, and the exact order in which they were collected. For instance, consider  
 941 the ratio  $p_{k,t}/p_{j,t}$  for two arms  $(k, j) \in [K]^2$ . Using (4), we obtain

$$\frac{p_{k,t}^{\text{SGB}}}{p_{j,t}^{\text{SGB}}} = e^{\eta \sum_{s=1}^t r_s \cdot \{(1-p_{k,s})\mathbb{1}(A_s=k) - p_{k,s}\mathbb{1}(A_s \neq k) - (1-p_{j,s})\mathbb{1}(A_s=j) + p_{j,s}\mathbb{1}(A_s \neq j)\}} .$$

942 This expression shows that the current sampling ratio cannot be deduced from simple summary  
 943 statistics such as empirical means or counts. In contrast, standard policies typically admit arm-  
 944 specific exploration mechanisms, whose analyses rely on the concentration of statistics derived from  
 945 each arm’s individual history.

946 To illustrate this, consider first the MED algorithm, which, like SGB, is a randomized policy with  
 947 explicit sampling probabilities. As shown by Baudry et al. [51], MED can be abstractly described  
 948 using a divergence function  $D$  mapping the empirical distributions  $(F_{k,t})_{k \in [K]}$  (distributions of  
 949 rewards collected by each arm, respectively) and the best empirical mean  $\mu^*(t) = \max_{k \in [K]} \mu_{k,t}$ , to  
 950 positive values. Then, using the sample sizes  $(N_k(t))_{k \in [K]}$ , the sampling probability ratio is given by

$$\frac{p_{k,t}^{\text{MED}}}{p_{j,t}^{\text{MED}}} = \frac{e^{-N_k(t)D(F_{k,t}, \mu^*(t))}}{e^{-N_j(t)D(F_{j,t}, \mu^*(t))}} ,$$

951 Under mild conditions for divergences  $D$ , with similar properties to the  $\mathcal{K}_{\text{inf}}$  function, this form  
 952 allows the regret to be decomposed according to events involving  $\mu^*(t)$  and concentration of the  
 953 empirical distributions, leading to a complete regret analysis [51, Theorem 1].

954 A similar arm-specific structure underpins Thompson Sampling (TS), perhaps the most well-known  
 955 class of randomized policies. While TS does not admit a closed-form expression for its sampling  
 956 probabilities, its analyses rely on the arm-wise posterior distributions. In particular, modern problem-  
 957 dependent analyses [19, 42, 32] exploit quantities of the form

$$\mathbb{P}^{\text{TS}}(\tilde{\mu}_{k,t} \geq \mu | \mathcal{H}_{t-1}) = \mathbb{P}^{\text{TS}}(\tilde{\mu}_{k,t} \geq \mu | F_{k,t-1}), \text{ for } \mu \in \mathbb{R}$$

958 or their lower-tail counterparts, where  $\tilde{\mu}_{k,t}$  is a sample from the posterior distribution of arm  $k$  at  
 959 time  $t$ . Crucially, these events depend only on the history of arm  $k$ . This structural decoupling is  
 960 entirely absent in SGB, which lacks any notion of per-arm sampling mechanism or posterior.

961 Finally, consider the deterministic UCB family. Given arm-specific confidence indices  $\text{UCB}_{k,t}$ , the  
 962 action at time  $t$  is chosen as

$$A_t^{\text{UCB}} = \operatorname{argmax}_{k \in [K]} \text{UCB}_{k,t} ,$$

963 and the analysis focuses on events such as  $\{\text{UCB}_{k,t} \geq \mu_k + c\Delta_k\}$ , for some values of  $c \in (0, 1)$ . As  
 964 with TS, the confidence bounds are based solely on arm-specific empirical distributions and are thus  
 965 fully decomposable across arms. In stark contrast, even in highly simplified environments (e.g., when  
 966 only one arm yields random non-zero rewards), deriving concentration inequalities for the parameters  
 967  $(\theta_{k,t})_{k \in [K]}$  in SGB is challenging due to their entangled dependence on the global history.

**Comparison of Eq. (7) with similar regret decompositions in the literature** While we have highlighted the challenges of applying classical bandit analysis techniques to SGB, we now draw parallels between our approach and prior works on randomized policies for MAB.

Several studies have proposed general frameworks for analyzing the regret of randomized algorithms, including Thompson Sampling [38, Thm. 36.2], MED [51, Lemma 3], and bootstrap-based strategies [53, Thm. 1], [58, Thm. 3.1]. Although these analyses differ in presentation, they typically yield a regret decomposition of the following idealized form (using the notation of the present paper):

$$\mathcal{R}_T^\pi(\nu) \leq C_\nu^\pi \log(T) + \sum_{t=1}^T \mathbb{P}(p_{1,t} \geq 1 - \varepsilon), \text{ for some constant } C_\nu^\pi \geq 0.$$

These decompositions directly inspired our derivation of Eq.(7) and our interpretation of the two terms in the regret bound. In particular, Riou and Honda [44] introduced and motivated the terminology of post-convergence and pre-convergence terms to describe the first (logarithmic term) and second components, respectively. We adopt a similar language in this work: we prove that the *post-convergence* term in Eq. (7) is logarithmic in  $T$  (Lemma 2), and we show in Appendix F.1 that the second term of Eq. (7), that we call *failure regret*, satisfies

$$\mathbb{E} \left[ \sum_{t=1}^T (1 - p_{1,t})^2 \right] \asymp \sum_{t=1}^T \mathbb{P}(p_{1,t} \geq 1 - \varepsilon).$$

In regimes where the pre-convergence term dominates the regret, this equivalence shows that the second term of Eq. (7) highlights a failure of the policy to consistently converge to the optimal action at a logarithmic rate. This motivates our use of the term *failure regret* to characterize this term.

#### A.4 Detailed discussion on global convergence and finite-time regret

In this section we complete the discussion from Section 1.1 that the global convergence properties of SGB does not preclude poor performance over finite horizons.

**A globally convergent policy with poor regret** We start by formally proving the statement that asymptotic convergence guarantees do not necessarily imply non-trivial regret guarantees.

**Proposition 1.** *Define an  $\varepsilon$ -Greedy policy  $\pi$  as follows: for  $t \leq K$  sample each arm once, and compute their empirical averages. Then, for the rest of time steps  $t \geq K + 1$ , select an arm uniformly at random with probability  $\varepsilon_t = (t \log t)^{-1}$ , and otherwise play the arm with best sample average.*

*Then, the policy  $\pi$  converges asymptotically to an optimal policy, but its regret satisfies  $\mathcal{R}_T \gtrsim \frac{T\Delta}{\log(T)}$  for any  $K$ -armed bandit problem with Bernoulli distributions of non-zero means.*

*Proof.* The proof below assumes that arm 1 is the only sub-optimal arm, but the arguments easily extend to cases where multiple arms are optimal. We start by proving the convergence claim. Since  $\sum_{t \geq 1} (t \log(t))^{-1} = +\infty$ , each arm is guaranteed to be explored infinitely often. Hence, after waiting long enough, the optimal arm is guaranteed to obtain sufficiently enough samples so that its empirical average will remain, for instance, over  $\mu_1 - \frac{\Delta}{2}$  for the rest of the trajectory. Similarly, over-estimation of any sub-optimal arm will be corrected, either thanks to the forced exploration scheme or because the arm was played a lot by appearing optimal for some time. This establishes that the policy  $\pi$  converges to an optimal arm almost surely.

We now prove the (almost) linear regret lower bound. We prove that  $\varepsilon_t$  is decaying fast enough so that there is a non-negligible probability that there is *no exploration at all* during a trajectory of length  $T > K$ . In particular, this probability is lower bounded by

$$\begin{aligned} p_{\text{no exploration}} &:= \prod_{t=K}^T \left( 1 - \frac{1}{t \log(t)} \right) = e^{\sum_{t=K}^T \log\left(1 - \frac{1}{t \log(t)}\right)} \\ &\geq e^{-\sum_{t=K}^T \frac{1}{t \log(t)} - \sum_{t=K}^T \frac{1}{2t^2 \log(t)^2} \cdot \frac{t \log(t)}{t \log(t) - 1}} \\ &\gtrsim e^{-\sum_{t=K}^T \frac{1}{t \log(t)}} \gtrsim \frac{1}{\log(T)}. \end{aligned}$$

Hence, if this scenario occurs and the best arm collected a reward 0 for its first pull, while at least one other arm received a +1 reward, then a sub-optimal arm is selected for the  $T - K$  remaining steps. The probability of this specific event is e.g. lower bounded by  $(1 - \mu_1) \max_{k \geq 2} \mu_k > 0$ , by assumption that  $\max_{k \geq 2} \mu_k > 0$ . Hence, in this setting the regret of  $\pi$  satisfies  $\mathcal{R}_T \gtrsim \frac{T\Delta}{\log(T)}$ .  $\square$

**Linear regret on finite horizon** We now formalize the intuition that, for a fixed horizon  $T$ , using a learning rate that scales with  $\log(T)$  in the softmax transformation may be problematic: a small number of unfavorable rewards can drastically reduce the probability of selecting arm 1 in subsequent rounds. Since  $\log(T)$  remains moderate for practical values of  $T$ , this highlights a potential fragility of SGB when large learning rates are used without additional assumptions on the reward distributions.

**Proposition 2** (Linear regret). *Let  $\nu \in \mathcal{F}^K$  defined by  $\nu_1 = \text{Rad}(1/2)$  and  $\nu_2 = \dots = \nu_K = \delta_0$ . Then, for any  $\varepsilon \in (0, 1)$ ,  $\eta \geq \log\left(\frac{T-1}{(K-1)(1-\varepsilon)}\right) \implies \mathcal{R}_T^{\text{SGB}}(\nu) \geq \frac{\varepsilon(T-1)}{8}$ .*

The proof of Proposition 2 follows directly from the more general result presented below, instantiated with  $1 - \mu_1 = \frac{1}{2}$ ,  $\Delta_k = \frac{1}{2}$  for all  $k \in \{2, \dots, K\}$ . We highlight that the  $K - 1$  term in the proposition is permitted, by a slight change in the last steps of the proof of the lemma, that we detail below.

**Lemma 4** (Example 1: optimal Rademacher vs non-negative rewards). *Let  $\nu_1$  be a Rademacher distribution of mean  $\mu_1 > 0$ , and  $(\nu_2, \dots, \nu_K)$  be any distributions supported on  $[0, 1]$ . Then,*

$$\forall \varepsilon \in (0, 1) : \eta \geq \log\left(\frac{T-1}{1-\varepsilon}\right) \implies \mathcal{R}_T(\nu) \geq \varepsilon \cdot \frac{1-\mu_1}{2} \cdot \Delta \cdot (T-1).$$

*Proof.* As in the main paper, we use the notation  $\Delta := \min_{k \geq 2} \Delta_k$ . For this example, since the sub-optimal arms have non-negative rewards, then  $\delta\theta_{1,t} \leq 0$  if  $A_t \neq 1$ . Let  $t_0$  denote the first (random) time for which  $A_t = 1$  holds. Then, it holds that

$$\begin{aligned} \mathcal{R}_T &\geq \Delta(T-1) \cdot \mathbb{P}(N_1(T) \leq 1) \\ &\geq \Delta(T-1) \cdot \mathbb{P}(N_1(T) \leq 1 | r_{t_0} = -1) \cdot \mathbb{P}_\nu(r_{t_0} = -1) \\ &= \Delta(T-1) \cdot \mathbb{P}(N_1(T) \leq 1 | r_{t_0} = -1) \cdot \frac{1-\mu_1}{2} \\ &\geq \Delta(T-1) \cdot \frac{1-\mu_1}{2} \cdot (1 - \mathbb{P}(\exists t \in \{2, \dots, T\} : A_t = 1 | p_{1,t} \leq e^{-\eta})) , \end{aligned}$$

where the last line comes from a worst case bound for the value of  $t_0$  and the fact that after receiving  $r_{t_0} = -1$  then

$$p_{1,t_0+1} \leq \frac{e^{-\eta \frac{K-1}{K}}}{e^{-\eta \frac{K-1}{K}} + e^{\frac{\eta}{K}}} \leq e^{-\eta}.$$

Indeed, since all rewards from sub-optimal arms are non-negative, then (1)  $\theta_{1,t} \leq 0$  for  $t \leq t_0$ , and  $p_{1,t}$  remains the minimum of the sampling distribution, so  $1 - p_{1,t} \geq \frac{K-1}{K}$ ; and (2) from (9) at least one sub-optimal arm has a non-negative parameter and probability larger than  $1/K$ , thus the bound on the denominator. We now use the union bound

$$\mathbb{P}(\exists t \in \{2, \dots, T\} : A_t = 1 | p_{1,t} \leq e^{-\eta}) \leq (T-1)e^{-\eta},$$

which, for any  $\varepsilon \in (0, 1)$ , is smaller than  $1 - \varepsilon$  if  $\eta \geq \log\left(\frac{T-1}{1-\varepsilon}\right)$ . Note that for the proof of Proposition 2, since sub-optimal arms does not yield non-zero rewards the sampling probabilities remain uniform until  $t_0$ , and then it holds that

$$p_{1,t_0+1} = \frac{e^{-\eta \frac{K-1}{K}}}{e^{-\eta \frac{K-1}{K}} + (K-1)e^{\frac{\eta}{K}}} \leq \frac{e^{-\eta}}{K-1},$$

which by substituting in above steps allows to include a  $K - 1$  term in the logarithm.  $\square$

We now complement Lemma 4 by showing that choosing  $\eta = \Omega(\log(KT))$  leads to linear regret for a broad class of reward distributions. This further demonstrates that large learning rates can be harmful in the absence of stronger assumptions on the distributional structure.

1031 **Lemma 5** (Example 2: Non-negative support). Assume that the rewards are supported on  $[0, 1]$ .  
 1032 Then if  $\eta > \frac{1}{\max_{k \geq 2} \mu_k} \cdot \log((K-1)(T-1))$  then the regret is linear, and more precisely,

$$\forall \varepsilon \in (0, 1) : \mathcal{R}_T \geq \frac{\varepsilon}{K} \cdot \left( \sum_{k=2}^K \mathbb{P}_{r \sim \nu_k}(r \geq \mu_k) \Delta_k \cdot \mathbb{1} \left( \eta \geq \frac{1}{\mu_k} \log \left( \frac{(K-1)(T-1)}{1-\varepsilon} \right) \right) \right) \cdot T,$$

1033 which holds for  $\eta > \log((K-1)(T-1))$  directly if the rewards are Bernoulli.

1034 *Proof.* For each distribution  $\nu_k$  with  $k \in [K]$ , there exists a constant  $q_k > 0$  such that  $q_k = \mathbb{P}(r_t \geq$   
 1035  $\mu_k \mid A_t = k)$ . Therefore, at time  $t = 1$ , each arm  $k$  has a probability  $\frac{q_k}{K}$  of being selected and  
 1036 yielding a reward  $r_1(k) \geq \mu_k$ . Conditioned on this event for arm  $k$ , the probability assigned to arm  $k$   
 1037 at the beginning of the next round satisfies

$$p_{k,2} \geq \frac{e^{\frac{\eta(K-1)\mu_k}{K}}}{(K-1)e^{-\frac{\eta\mu_k}{K}} + e^{\frac{\eta(K-1)\mu_k}{K}}} \implies 1 - p_{k,2} \leq (K-1)e^{-\eta\mu_k},$$

1038 and arm  $k$  is played for all remaining rounds with probability larger than  $1 - (T-1)(1 - p_{k,2})$ ,  
 1039 using a union bound argument. In particular, this probability is larger than  $\varepsilon > 0$  if  $\eta \geq \frac{1}{\mu_k} \cdot$   
 1040  $\log \left( \frac{(K-1)(T-1)}{1-\varepsilon} \right)$ . The result then comes by summing over all sub-optimal arms. Finally, the  
 1041 refinement for Bernoulli distributions is straightforward by replacing  $\mu_k$  by 1 in the bound on  
 1042  $p_{k,2}$ .  $\square$

## 1043 B Detailed comparison with related works

1044 In this appendix, we elaborate on the comparison between the analysis of SGB proposed in this paper  
 1045 and the two most closely related works [1, 29]. Mei et al. [1] introduced the only existing prior  
 1046 regret analysis of SGB but, as we will show, suffers from certain limitations, and Walton and Denisov  
 1047 [29] introduced the SAMBA algorithm, another gradient ascent-based policy, for which they prove  
 1048 logarithmic regret for any number of arms and Bernoulli rewards, under proper gap-dependent tuning  
 1049 of the learning rate. As we will discuss, while SAMBA shares some similarities with SGB, it also  
 1050 exhibits key differences that impact both its theoretical and practical behavior.

### 1051 B.1 Comments on the previous analysis of SGB for small learning rates

1052 In this appendix, we compare the results we obtained in this work with the previous guarantees  
 1053 derived by [1], for a general number of arms  $K$  but small learning rates. We also document a potential  
 1054 issue in their analysis, which might invalidate the proof of the main regret upper bound [1, Theorem  
 1055 5.5]. We propose a correction (Theorem 5), that yields a fully explicit logarithmic regret bound for  
 1056  $K = 2$  (Eq. (15)), under the same restriction on the learning rate as in the original paper. To do that,  
 1057 we used some of the results introduced in this paper, more precisely from the proof of Theorem 1.

1058 Unfortunately, this technique is specific to the case  $K = 2$ , and we are not aware of a straightforward  
 1059 extension to settings with  $K > 2$ . In fact, the missing arguments appear closely related to those  
 1060 required to complete the regret analysis in Corollary 3, discussed in Section 3. For this reason, we  
 1061 present Section 3 with the view that a full regret analysis of SGB in the general  $K$ -armed setting  
 1062 remains an open and challenging problem.

1063 **Comparison of the regret upper bounds** Adopting the notation of the present paper, we can  
 1064 restate Theorem 5.5 of Mei et al. [1] as follows,

$$\eta \leq \frac{\Delta^2}{40K^{3/2}} \implies \forall \nu \in \mathcal{F}^K : \mathcal{R}_T^{\text{SGB}} \leq \frac{2}{\mathbb{E}[c^2]} \cdot \frac{\log(T)}{\eta} + 1, \quad \text{where } c = \inf_{t \geq 1} p_{1,t}.$$

1065 Beyond the requirement that the learning rate must scale with  $\Delta^2$  (as opposed to  $\Delta$ ), we observe that  
 1066  $c^2 \leq p_{1,1}^2 = \frac{1}{K^2}$ , so the regret bound scales at least as  $\frac{2K^2 \log(T)}{\eta}$ . In contrast, in the symmetric case  
 1067 where  $\Delta_2 = \dots = \Delta_K = \Delta$ , Theorem 4 shows that the regret is at most  $\frac{2K}{\eta} \log(T)$ , for learning

1068 rates that may be as large as  $\eta \approx \frac{2\Delta}{K+2}$ . This improves the bound by a factor at least  $\frac{80K^{5/2}}{(K+2)\Delta}$ , which  
 1069 is significant in many settings.

1070 Based on the theoretical developments in this work, we further conjecture that the regret of SGB in  
 1071 the general  $K$ -armed setting should be  $\frac{K-1}{K} \cdot \frac{\log(T)}{\eta} + o(\log(T))$ , for learning rates that could be only  
 1072 required to satisfy  $\eta \leq \frac{2\Delta}{K}$ . This suggests that the analysis in [1] may be conservative, potentially  
 1073 leading to a suboptimal characterization of SGB's regret. It remains an open question whether the  
 1074 techniques from this work—closely related to those used in the analysis of stochastic gradient descent  
 1075 in optimization—and the tools introduced in the present paper can be combined to obtain tighter  
 1076 regret bounds in the general  $K$ -armed case.

1077 **Issue with the proof** The development in Equation (282) in the proof of [1, Theorem 5.5] assumes  
 1078 that the random variable  $c$  is independent of  $\delta(\theta_t)$  (using the notation of their paper where  $\delta(\theta_t) :=$   
 1079  $(\pi^* - \pi_{\theta_t})^\top r$  denotes the sub-optimality gap at the current state of the policy) which we believe  
 1080 does not hold. Indeed, the variable  $c$  satisfies  $c = p_{1,t} \wedge \inf_{s \geq 1, s \neq t} p_{1,s}$  for any  $t$  including the one  
 1081 that defines  $\delta(\theta_t)$ , and thus it cannot be independent of  $c$ . In addition, it is clear that the correlation  
 1082 between  $c$  and  $\delta(\theta_t)$  is in the wrong direction for Equation (282) to hold.

1083 In order to overcome this issue, we suggest to get back to their Equation (277), and to keep the  
 1084  $t$ -dependent quantity  $\pi_{\theta_t}(a^*)$  (or  $p_{1,t}$  for us) instead of taking the infimum over all time steps. Then,  
 1085 we can adapt their Equation (281) to obtain, with their notation,

$$\forall t \geq 1, \quad \delta(\theta_t) - \mathbb{E}_t[\delta(\theta_{t+1})] \geq \frac{\eta \cdot \pi_{\theta_t}(a^*)^2}{2} \cdot \delta(\theta_t)^2.$$

1086 Here, to correctly account for the dependence between  $\delta(\theta_t)$  and  $\pi_{\theta_t}(a^*)$ , we can use Cauchy-  
 1087 Schwartz inequality to obtain that

$$\mathbb{E}[\delta(\theta_t)^2 \pi_{\theta_t}(a^*)^2] \geq \frac{\mathbb{E}[\delta(\theta_t)]^2}{\mathbb{E}\left[\frac{1}{\pi_{\theta_t}(a^*)^2}\right]}.$$

1088 As a remark, we think that taking the supremum outside the expectation makes further analysis of  
 1089 this term easier. From that step, we can directly follow the proof steps of Mei et al. [1] to adapt their  
 1090 result and obtain the following correction.

1091 **Theorem 5** (Corrected version of Theorem 5.5 from [1]). *For any instance  $\nu \in \mathcal{F}^K$ , SGB tuned with*  
 1092 *learning rate  $\eta$  admits the following regret bound,*

$$\eta \leq \frac{\Delta^2}{40K^{3/2}} \implies \mathcal{R}_T^{\text{SGB}} \leq \sup_{t \in [T]} \mathbb{E} \left[ \frac{1}{\pi_{\theta_t}(a^*)^2} \right] \cdot \frac{2 \log(T)}{\eta} + 1. \quad (14)$$

1093 We recall that the original proof steps could have led to a factor  $\frac{1}{\inf_{t \in [T]} \mathbb{E}[\pi_{\theta_t}(a^*)^2]}$ , which the authors  
 1094 rightfully treated as a *positive problem-dependent constant*. Indeed, since there exist some favorable  
 1095 scenarios for which  $\pi_{\theta_t}(a^*)$  rapidly starts converging to 1, it is clear that one can assume that there  
 1096 exists a finite constant  $\gamma > 0$  (depending on  $\nu$  and  $\eta$ ) such that  $\inf_{t \in [T]} \mathbb{E}[\pi_{\theta_t}(a^*)^2] > \gamma$ .

1097 Unfortunately, after correction it is **non-trivial to deduce that the regret is logarithmic**: proving  
 1098 that  $\mathbb{E} \left[ \frac{1}{\pi_{\theta_t}(a^*)^2} \right] < C$  for some constant  $C > 0$  requires a much more careful analysis, since it  
 1099 becomes necessary to consider *extreme events* that could make the ratio large. For instance, if  
 1100  $\pi_{\theta_T}(a^*) = \mathcal{O}(T^{-1})$  with probability  $\Omega(T^{-1})$  then the regret bound becomes linear in  $T$ . This  
 1101 scenario needs to be carefully considered, since it is typical for optimized bandit policies, like  
 1102 Thompson Sampling, as documented by [60].

1103 For the case  $K = 2$ , however, we can apply the techniques from the proof of Theorem 1 to show  
 1104 that this upper bound is non-vacuous. Indeed, using our notation (and dropping the 1 subscript), we  
 1105 obtain by expanding the fraction that

$$\mathbb{E} \left[ \frac{1}{p_t^2} \right] = \mathbb{E} \left[ \left( \frac{1-p_t}{p_t} \right)^2 + \frac{2}{p_t} - 1 \right],$$

and from the second to last equation in the proof of Thm. 1, we know that for  $\eta \leq \Delta e^{-2\Delta}$  the expectation  $\mathbb{E}[2/p_t]$  initialized at  $p_1 = 1/2$  is decreasing and thus

$$\mathbb{E}\left[\frac{1}{p_t^2}\right] = \mathbb{E}\left[\left(\frac{1-p_t}{p_t}\right)^2 + \frac{2}{p_t} - 1\right] \leq \mathbb{E}\left[\left(\frac{1-p_t}{p_t}\right)^2\right] + 3$$

Using the notation  $x_t^2 := \left(\frac{1-p_t}{p_t}\right)^2$  used in the proof of Thm 1, we have  $x_t^2 = e^{-4\theta_t}$  by Eq. (11) in Appendix A. The exponential form allows to derive an equivalent bound on the expectation of  $x_t^2$  as done for the expectation of  $x_t$  in the proof of Thm. 1 but with  $2\eta$  instead of  $\eta$ . Consequently, we have that  $x_t^2$  is a supermartingale for  $2\eta C_{2\eta} \leq \Delta$  and with  $x_1 = 1/2$  its expectation is bounded as

$$\text{for } K = 2, \quad 2\eta C_{2\eta} \leq \Delta \implies \sup_{t \geq 1} \mathbb{E}\left[\left(\frac{1-p_t}{p_t}\right)^2\right] \leq \frac{(1-p_1)^2}{p_1^2} = 1,$$

which yields that  $\mathbb{E}[1/p_t^2] \leq 4$ .

This condition on  $\eta$  required for  $\mathbb{E}[1/p_t^2] \leq 4$  is weaker than the one  $\eta \leq \Delta^2/(40K^{3/2})$  needed for the rest of the convergence proof of Theorem 5. Hence, for  $K = 2$ , Theorem 5 yields the upper bound on the regret as

$$\eta \leq \frac{\Delta^2}{40K^{3/2}} \implies \forall \nu \in \mathcal{F}^2 : \quad \mathcal{R}_T^{\text{SGB}} \leq \frac{8 \log(T)}{\eta} + 1. \quad (15)$$

We can comment this result is strictly weaker than the one we establish in Theorem 1, which yields the following bound for the same range of learning rates,

$$\mathcal{R}_T^{\text{SGB}} \leq \frac{\log\left(1 + \frac{\Delta^3}{25}T\right) + 1}{2\eta},$$

where in the logarithm we used that  $\eta \leq \frac{\Delta^2}{40 \cdot 2^{3/2}} \leq \frac{\Delta^2}{100}$ . Notably, our result allows for learning rates that are approximately a factor  $100/\Delta$  larger than the ones permitted by Thm. 5, while still maintaining a tighter regret guarantee (for a fixed learning rate).

Unfortunately, for the general  $K$ -arms case fixing the proof of Thm. 5.5 from [1] by bounding  $\mathbb{E}[1/p_{1,t}^2]$  appears difficult, potentially requiring to derive the same tools needed to complete an independent regret analysis from the upper bounds presented in Section 3.

An interestingly comparison between the two regret bounds arises by noticing that Thm. 5 yields an upper bound that *multiplies* a (logarithmic) term, resembling the post-convergence component of Eq. (7), by a term related to the failure regret (proportional to  $\mathbb{E}[1/p_t^2]$ ). On the other hand our regret decomposition in (7) is the result of *adding* the two components.

**Comment on the small learning rate** Lastly, we investigated whether the small learning rate requirement in [1] is a byproduct of some looseness in some technical results or a more intrinsic limitation of the policy. We found that the restriction arises from the foundational technical results used to derive the analysis. Consider the two-armed case. In this paper, we showed that for small  $\eta, \Delta$ , ignoring for convenience the term  $C_\eta$  in the following lines, it holds that

$$\mathbb{E}_t[1 - p_{t+1}] \approx \mathbb{E}_t[e^{-2\theta_{t+1}}] = e^{-2\theta_t} \mathbb{E}_t[e^{-2\eta\delta\theta_t}] \approx (1 - p_t) - 2\eta(\Delta - \eta) \cdot p_t(1 - p_t)^2,$$

using that  $e^x \approx 1 + x + x^2/2$  and the expressions for  $\delta\theta_t$  and  $(\delta\theta_t)^2$  from Appendix A.2. This indicates that the policy improves in expectation between step  $t$  and step  $t + 1$  when  $\eta < \Delta$  holds, for any value of  $p_t$ , but with an amplitude that depends on the current value of  $p_t$ .

In contrast, the analysis in [1] is based on the equation stated above their Proposition 3.1, which follows from the  $\frac{5}{2}$ -smoothness of the current value of the policy under the softmax parametrization [13, Lemma 2]. Specializing this equation to the case of  $K = 2$  arms yields the following bound in expectation:

$$\mathbb{E}_t[p_t - p_{t+1}] \cdot \Delta \leq -2\eta \cdot p_t^2(1 - p_t)^2 \Delta^2 + \frac{5}{2} \cdot \eta^2 \cdot p_t(1 - p_t),$$

1140 where we used Eq. (12) with  $s \leq 1$  to bound the term  $\mathbb{E}_t[\|\theta_{t+1} - \theta_t\|_2^2]$ . The correctness of the  
 1141 scaling of all terms in the inequality above can be confirmed by comparison with Lemma 4.3 in [1].  
 1142 However, this bound is difficult to interpret, especially when  $p_t(1 - p_t)$  is small, due to the mismatch  
 1143 in the dependence on  $p_t$  between the progress (negative) and noise (positive) terms. Even assuming  
 1144 that both terms had the same dependence on some common factor  $A_t$ , we would still obtain that the  
 1145 policy’s value increases in expectation only if  $\eta \lesssim \Delta^2$ . This indicates that the overly conservative  
 1146 scaling of  $\eta$  in terms of  $\Delta$  arises from looseness in this preliminary bound, rather than from any  
 1147 fundamental limitation of SGB itself: the  $\frac{5}{2}$ -smoothness property of the softmax-parametrized policy  
 1148 does not appear to accurately capture the dynamics of the SGB update.

## 1149 B.2 Detailed comparison between SGB and SAMBA

1150 In SAMBA the gradient ascent is directly performed on the sampling probabilities, with no use of  
 1151 parametrization. Starting from the uniform probability, at each time step  $t > 1$  SAMBA performs the  
 1152 following steps:

- 1153 1. Define  $a_t^* = \operatorname{argmax}_{a \in [K]} p_t(a)$ , draw  $a_t \sim p_t$ , collect  $R_t$ .
- 1154 2. If  $a_t = a_t^*$ , then for  $a' \neq a_t^*$ :  $p_{t+1}(a') = p_t(a') - \alpha p_t(a')^2 \cdot \frac{R_t}{p_t(a_t^*)}$
- 1155 3. Else,  $p_{t+1}(a_t) = p_t(a_t) + \alpha p_t(a_t)^2 \cdot \frac{R_t}{p_t(a_t)}$ .
- 1156 4. Define  $p_{t+1}(a_t^*) = 1 - \sum_{a \neq a_t^*} p_{t+1}(a)$

1157 It is easy to verify that if  $\alpha \leq 1$ , the update remains within the probability simplex. Interestingly,  
 1158 under this scheme a probability  $p_t(a)$  is updated only if it was pulled or if the arm with the highest  
 1159 current probability was pulled. From a gradient ascent perspective, this is a natural approach: the arm  
 1160 with the highest probability serves as the current best guess for the optimal arm, making it reasonable  
 1161 to form importance-weighted estimates of the gap  $\Delta_a$  relative to this reference. However, this feature  
 1162 introduces a structural asymmetry, between the *leading* arm and the others, that complicates direct  
 1163 comparisons between SGB and SAMBA when  $K > 2$ .

1164 For  $K = 2$ , we can compare the two methods more precisely. Consider the asymptotic regime in  
 1165 which arm 1 has the highest selection probability. In this setting, SAMBA updates the probability of  
 1166 arm 2 according to

$$\mathbb{E}_t^{\text{SAMBA}}[p_{2,t+1}] = p_{2,t} - \alpha \Delta \cdot p_{2,t}^2.$$

1167 Meanwhile, under SGB we have

$$\begin{aligned} \mathbb{E}_t^{\text{SGB}}[p_{2,t+1}] &\approx p_{2,t} \cdot \mathbb{E}_t[e^{-2\delta\theta_t}] \\ &\approx p_{2,t} \cdot (1 - 2p_{2,t}(1 - p_{2,t})\eta(\Delta - \eta C_\eta)) \\ &= p_{2,t} - 2\eta(\Delta - \eta C_\eta) \cdot p_{2,t}^2(1 - p_{2,t}), \end{aligned}$$

1168 using the same steps as in the second to last equation in the proof of Thm. 1. Hence, in the asymptotic  
 1169 regime where  $p_{2,t} \ll 1$ , the expected update of SGB and SAMBA become approximately equivalent if  
 1170 the learning rates are related by  $\alpha \Delta = 2\eta(\Delta - \eta C_\eta)$ .

1171 We can now also compare the behavior of the two policies in the transient regime where  $p_{2,t} \geq p_{1,t}$ .  
 1172 In that case, the analysis of both policies is based on properties of  $p_{1,t}^{-1}$ . It is therefore natural to use  
 1173 this quantity as a basis for comparison in this regime. For SGB, we showed that

$$\mathbb{E}_t^{\text{SGB}}\left[\frac{1}{p_{1,t+1}}\right] \leq \frac{1}{p_{1,t}} - 2\eta(\Delta - \eta C_\eta)(1 - p_{1,t})^2,$$

1174 where the inequality is nearly tight when  $\eta$  is small. For SAMBA, rather than relying on the computa-  
 1175 tions of [29] which are specific to Bernoulli distributions, we propose a similar approximation to the

one used for SGB, for rewards supported on  $[-1, 1]$ . Assuming  $p_{2,t} > p_{1,t}$  and small  $\alpha$ , we obtain:

$$\begin{aligned}
\mathbb{E}_t^{\text{SAMBA}} \left[ \frac{1}{p_{1,t+1}} \right] &= \frac{1}{p_{1,t}} \cdot \mathbb{E}_t \left[ \frac{p_{1,t}}{1 + \alpha r_{1,t}} + \frac{p_{2,t}}{1 - \alpha \frac{p_{1,t}}{p_{2,t}} r_{2,t}} \right] \\
&\approx \frac{1}{p_{1,t}} \cdot \left( p_{1,t}(1 - \alpha \mu_1 + \alpha^2 \mathbb{E}[r_{1,t}^2]) + p_{2,t} + \alpha p_{1,t} \mu_2 + \alpha^2 \frac{p_{1,t}^2}{p_{2,t}} \mathbb{E}[r_{2,t}^2] \right) \\
&= \frac{1}{p_{1,t}} - \alpha \Delta + \alpha^2 \left( \mathbb{E}[r_{1,t}^2] + \frac{p_{1,t}}{p_{2,t}} \mathbb{E}[r_{2,t}^2] \right) \\
&\leq \frac{1}{p_{1,t}} - \alpha(\Delta - 2\alpha).
\end{aligned}$$

This yields the sufficient condition  $\alpha < \frac{\Delta}{2}$  to ensure that  $p_{1,t}^{-1}$  is a super-martingale when  $p_{2,t} > p_{1,t}$ , which is a stricter requirement than the one from [29] for Bernoulli rewards. Note the above computations can be made exact by using a constant  $D_\alpha$  analogous to  $C_\eta$  used for second-order approximation of the exponential in the analysis of SGB.

The main insight from this analysis, however, is that the term  $(1 - p_{1,t})^2$ , which appears naturally in the update dynamics of SGB, does not appear in the approximation for SAMBA. Consequently, the elegant connection we established between  $\mathbb{E}[p_0^{-1} - p_T^{-1}]$  and the regret for SGB does not seem to hold for SAMBA: the two policies seem to admit different pre-convergence behavior, even for  $K = 2$ .

We can finally remark that, although limited to Bernoulli distributions, the analysis of [29] yields logarithmic regret for SAMBA under the condition  $\alpha < \Delta$ . Notably, this requirement **does not depend on  $K$** . We leave for future work the investigation of whether it is preferable—both theoretically and empirically—to maintain the update rule of SGB, where the parameters of all arms are updated at each step, or to adopt a more selective approach as in SAMBA, where non-leading arms cannot influence their respective updates. In particular, the intuitive explanation provided in Appendix D.3 regarding the necessary dependence of  $\eta$  on  $K$  for SGB may no longer apply if updates are implemented through a mechanism akin to that of SAMBA, where a leading arm is treated differently as the others.

## C Proof of Theorem 2: polynomial regret when $\eta \gtrsim \Delta$

**Roadmap** Below, we present the proof of Theorem 2, which re-uses the proof sketch of Section 2, but adding precise references to the technical lemmas needed for the proof. These results, Lemma 6 and Lemma 7, are presented in the following sections of this appendix. Furthermore, the proof of Lemma 7 is quite technical and itself supported by several intermediate results, that we detail.

We start by restating the theorem.

**Theorem 2** (Polynomial regret). *Let  $\nu = (\nu_k)_{k \in [K]} \in \mathcal{F}^K$  be a bandit instance defined by  $\nu_1 = \text{Rad}(\Delta)$  for some  $\Delta \in (0, 1)$ , and  $\nu_2 = \dots = \nu_K = \delta_0$ . Then, it holds that*

$$\eta > \lambda_\Delta := \frac{K-1}{K} \cdot \log \left( 1 + 2 \frac{\Delta}{1-\Delta} \right) \implies \forall \varepsilon > 0, \mathcal{R}_T = \tilde{\Omega} \left( T^{1-(1+\varepsilon) \cdot \frac{\lambda_\Delta}{\eta}} \right),$$

where  $\tilde{\Omega}$  hides polylogarithmic terms in  $T$  and factors depending on  $\eta$  and  $\Delta$ .

*Proof.* We follow the sketch of proof presented in Section 2, adding the detailed computations and references to the supporting results.

**Step 1:** let  $\tilde{p}_{n+1}$  be the sampling probability of arm 1 after its  $n$  first pulls, and  $\mathcal{S}$  be the event that  $\tilde{p}_{n+1} \leq \frac{1}{2T}$  for some value of  $n$  that we will fix later. Then, under  $\mathcal{S}$  the probability that arm 1 is never pulled again after its  $n$  first selections is larger than  $(1 - \frac{1}{2T})^T \geq \frac{1}{2}$ , in which case the regret is larger than  $T - n$ . We hence first obtain that

$$R_T(\nu) \geq \Delta \cdot \mathbb{P}(\mathcal{S}) \cdot \frac{(T-n)_+}{2}.$$

**Step 2:** We lower bound  $\mathbb{P}(\mathcal{S})$  for a well-chosen value of  $n$ , by identifying a scenario that leads (deterministically) to  $\tilde{p}_{n+1} \leq \frac{1}{2T}$ . Let  $n_0, n_1$  be integers to be specified later, we consider the following repartition of  $n$  pulls in two phases,

1211 • **Phase 0 - very unlucky start:** for its first  $n_0$  pulls, arm 1 collects only  $-1$  rewards. We  
 1212 denote this event by  $\mathcal{S}_0$ .

1213 • **Phase 1 - failed recovery:** the following  $n_1$  pulls of arm 1 have an empirical mean  
 1214 satisfying  $\hat{\mu}_{n_1} \lesssim -\Delta$  and the number of  $+1$ s received is never more than the number of  
 1215  $-1$ s throughout this phase. We denote this event by  $\mathcal{S}_1$ .

1216 Since  $\nu_1$  is Rademacher of mean  $\Delta$ , it is direct that  $\mathbb{P}(\mathcal{S}_0) = \left[\frac{1-\Delta}{2}\right]^{n_0}$ . For phase 1, let  $(\tilde{R}_t)_{t \geq 1}$   
 1217 denote the stream of rewards collected by arm 1 (in the order they are received), and  $\hat{\mu}_{n_1} =$   
 1218  $\frac{1}{n_1} \sum_{t=n_0+1}^{n_0+n_1} \tilde{R}_t$  be the empirical mean of the rewards during phase 1. Let  $S_{n_1} = \sum_{t=n_0+1}^{n_0+n_1} \mathbb{1}\{\tilde{R}_t =$   
 1219  $1\}$  be the number of ones received during this phase. We first define

$$\alpha := \frac{2}{\Delta} \left( \frac{1}{2} - \frac{\lceil \frac{1-\Delta}{2} \cdot n_1 \rceil}{n_1} \right) \in \left[ 1 - \frac{2}{\Delta n_1}, 1 \right],$$

1220 so that  $\frac{1-\alpha\Delta}{2}$  is an integer greater than  $\frac{1-\Delta}{2} \cdot n_1$  with  $\alpha$  that is as close to 1 as possible.

1221 From Lemma 6, we first obtain that

$$\mathbb{P}(\hat{\mu}_{n_1} = -\alpha\Delta) = \mathbb{P}\left(S_{n_1} = \frac{1-\alpha\Delta}{2} \cdot n_1\right) \geq e^{-1/6} \sqrt{\frac{2}{n_1\pi}} \exp\left(-n_1 \cdot \Delta \log\left(1 + \frac{2\Delta}{1-\Delta}\right)\right).$$

1222 Then, conditioned on this event, Bertrand's Ballot theorem [61, 62] provides that the running number  
 1223 of  $-1$  always exceeds the running number of  $+1$  with probability

$$\frac{(n_1 - S_{n_1}) - S_{n_1}}{n_1} = \frac{n_1 - 2S_{n_1}}{n_1} = -\hat{\mu}_{n_1} = \alpha\Delta,$$

1224 which finally gives that the probability of  $\mathcal{S}_1$  is lower bounded by

$$\mathbb{P}(\mathcal{S}_1) \geq \alpha\Delta \cdot e^{-1/6} \sqrt{\frac{1}{2n_1\pi}} \exp\left(-n_1 \cdot \Delta \log\left(1 + \frac{2\Delta}{1-\Delta}\right)\right).$$

1225 Then, it remains to show that  $\mathcal{S}_0 \cap \mathcal{S}_1 \subset \mathcal{S}$  for some values of  $n_0$  and  $n_1$ . By Lemma 7, this is  
 1226 guaranteed for  $n = n_0 + n_1$  by fixing

$$n_0 = \left\lceil \frac{1}{\eta} \cdot \frac{K}{K-1} \cdot \log\left(\frac{1}{\varepsilon \cdot (K-1)}\right) \right\rceil \vee \left\lceil \frac{1}{\eta} \left(\frac{K}{K-1}\right)^2 \log\left(\frac{K^3 n_1}{(K-1)^2}\right) \right\rceil,$$

and  $n_1 = \left\lceil \frac{K-1}{K} \cdot \frac{\log(2T/(K-1))}{\eta\Delta(1-\varepsilon)} + \frac{2}{\Delta} \right\rceil.$

1227 By independence of the two sequences of rewards involved, it holds that  $\mathbb{P}(\mathcal{S}) \geq \mathbb{P}(\mathcal{S}_0) \cdot \mathbb{P}(\mathcal{S}_1)$ . To  
 1228 obtain the scaling of the result, we combine the above results and use that  $n_0$  is tuned as a function  
 1229 of  $n_1$ . Hence, we can state that there exists a function  $C_{n_1}$ , with (inverse) polynomial scaling in  $n_1$ ,  
 1230 such that

$$\mathbb{P}(\mathcal{S}) \geq C_{n_1} \cdot e^{-n_1 \cdot \Delta \log\left(1 + \frac{2\Delta}{1-\Delta}\right)},$$

1231 so that replacing  $n_1$  by its value and ignoring the  $C_{n_1}$  term, which we hide with the  $\gtrsim$  sign, leads to

$$\begin{aligned} \mathbb{P}(\mathcal{S}) &\gtrsim e^{-n_1 \cdot \Delta \log\left(1 + \frac{2\Delta}{1-\Delta}\right)} \\ &\geq e^{-\left(1 + \frac{2}{\Delta} + \frac{K-1}{K} \frac{1+\varepsilon}{\eta\Delta} \log \frac{2T}{K-1}\right) \cdot \Delta \log\left(1 + \frac{2\Delta}{1-\Delta}\right)} \\ &= e^{-(\Delta+2) \log\left(1 + \frac{2\Delta}{1-\Delta}\right)} \cdot e^{-\frac{K-1}{K} \frac{1+\varepsilon}{\eta} \log\left(1 + \frac{2\Delta}{1-\Delta}\right) \cdot \log \frac{2T}{K-1}} \\ &= e^{-(\Delta+2) \log\left(1 + \frac{2\Delta}{1-\Delta}\right)} \cdot \left(\frac{2}{K-1}\right)^{-\frac{K-1}{K} \frac{1+\varepsilon}{\eta} \log\left(1 + \frac{2\Delta}{1-\Delta}\right)} \cdot T^{-\frac{K-1}{K} \frac{1+\varepsilon}{\eta} \log\left(1 + \frac{2\Delta}{1-\Delta}\right)}. \end{aligned}$$

1232 For completeness, we detail the poly-logarithmic terms coming from the expression of  $C_{n_1}$  below,

$$\begin{aligned}
C_{n_1} &:= \left(\frac{1-\Delta}{2}\right)^{n_0} \cdot \alpha \Delta \cdot e^{-1/6} \sqrt{\frac{2}{n_1 \pi}} \\
&\geq \alpha \Delta \cdot e^{-1/6} \cdot \sqrt{\frac{2}{n_1 \pi}} \cdot \left(\frac{1-\Delta}{2}\right) \cdot \left(\frac{K^3 n_1}{(K-1)^2}\right)^{\frac{1}{\eta} \left(\frac{K}{K-1}\right)^2 \log\left(\frac{1-\Delta}{2}\right)} \\
&= \alpha \Delta \cdot \left(\frac{1-\Delta}{2}\right) \cdot e^{-1/6} \cdot \sqrt{\frac{2}{\pi}} \cdot \left(\frac{K^3}{(K-1)^2}\right)^{\frac{1}{\eta} \left(\frac{K}{K-1}\right)^2 \log\left(\frac{1-\Delta}{2}\right)} \cdot n_1^{-\frac{1}{2} + \frac{1}{\eta} \left(\frac{K}{K-1}\right)^2 \log\left(\frac{1-\Delta}{2}\right)}.
\end{aligned}$$

1233 We can further detail  $C_{n_1}$  by replacing  $n_1$  by its value. For simplicity, we capture all the problem-  
1234 dependent factors in a new constant  $c_{\eta, \Delta}$ , and finally obtain that

$$\exists c_{\eta, \Delta} > 0 : \quad C_{n_1} \geq c_{\eta, \Delta} \cdot (\log(T))^{-\frac{1}{2} + \frac{1}{\eta} \left(\frac{K}{K-1}\right)^2 \log\left(\frac{1-\Delta}{2}\right)}.$$

1235 Step 3: Combining the results from the first two steps, we obtain that

$$R_T(\nu) \geq \Delta \cdot \mathbb{P}(\mathcal{S}) \cdot \frac{(T - n_0 - n_1)_+}{2} \gtrsim T^{1 - \frac{K-1}{K} \frac{1+\epsilon}{\eta} \log\left(1 + \frac{2\Delta}{1-\Delta}\right)},$$

1236 where the omitted constants depending on  $\eta$  and  $\Delta$  and polylog factors in  $T$  can be recovered from  
1237 the above lower bound on  $\mathbb{P}(\mathcal{S})$ .  $\square$

### 1238 C.1 Anti-concentration of the empirical mean of Rademacher variables

1239 **Lemma 6.** *Let  $n$  be a sample size and  $S_n$  be the number of ones received from  $n$  independent pulls  
1240 of a Rademacher variable of mean  $\Delta \geq \frac{2}{n}$ . Fix  $\alpha = \frac{2}{\Delta} \left(\frac{1}{2} - \frac{1}{n} \cdot \lceil \frac{1-\Delta}{2} \cdot n \rceil\right) \in [1 - \frac{2}{\Delta n}, 1]$ , then*

$$\mathbb{P}\left(S_n = \frac{1-\alpha\Delta}{2} \cdot n\right) \geq e^{-1/6} \sqrt{\frac{2}{n\pi}} \exp\left(-n \cdot \Delta \log\left(1 + \frac{2\Delta}{1-\Delta}\right)\right).$$

1241 *Proof.* Using the notation  $p := \frac{1+\Delta}{2}$ , we use the following standard formula,

$$\begin{aligned}
\mathbb{P}(S_n = s) &= \binom{n}{s} \cdot p^s (1-p)^{n-s} \\
&= \binom{n}{s} e^{s \log(p) + (n-s) \log(1-p)} \\
&= \binom{n}{s} e^{n \left(\frac{s}{n} \log\left(\frac{p}{s/n}\right) + \frac{n-s}{n} \log\left(\frac{1-p}{(n-s)/n}\right)\right) - nH\left(\frac{s}{n}\right)} \\
&= \binom{n}{s} e^{-nH\left(\frac{s}{n}\right)} \cdot e^{-n \text{kl}\left(\frac{s}{n}, p\right)},
\end{aligned}$$

1242 where  $H(x) = -x \log x - (1-x) \log(1-x)$  is the Shannon entropy, and  $\text{kl}$  the Bernoulli KL-  
1243 divergence. With  $\frac{s}{n} = \frac{1-\alpha\Delta}{2}$  and  $\alpha \leq 1$ , we have

$$\begin{aligned}
\text{kl}\left(\frac{s}{n}, p\right) &\leq \text{kl}\left(\frac{1-\Delta}{2}, \frac{1+\Delta}{2}\right) = \frac{1-\Delta}{2} \log \frac{1-\Delta}{1+\Delta} + \frac{1+\Delta}{2} \log \frac{1+\Delta}{1-\Delta} \\
&= \Delta \log\left(\frac{1+\Delta}{1-\Delta}\right) = \Delta \log\left(1 + \frac{2\Delta}{1-\Delta}\right).
\end{aligned}$$

1244 Sterling's approximation for the factorial [63] gives for any  $n \geq 1$

$$\sqrt{2\pi n} \left(\frac{n}{e}\right)^n < n! < \sqrt{2\pi n} \left(\frac{n}{e}\right)^n e^{1/12}.$$

Thus, for  $c \in (0, 1)$  such that  $cn$  is integer, we obtain that

$$\begin{aligned}
\binom{n}{cn} &= \frac{n!}{(cn)!((1-c)n)!} \\
&\geq \frac{\sqrt{2\pi n} \cdot n^n e^{-n}}{(e^{1/12} \sqrt{2\pi cn} \cdot c^{cn} n^{cn} e^{-cn}) \cdot (e^{1/12} \sqrt{2\pi(1-c)n} \cdot (1-c)^{(1-c)n} n^{(1-c)n} e^{-(1-c)n})} \\
&= \frac{e^{-1/6}}{\sqrt{2\pi c(1-c)n}} \cdot \left(\frac{n}{e}\right)^{n-cn-(1-c)n} \cdot \frac{1}{c^{cn} \cdot (1-c)^{(1-c)n}} \\
&= \frac{e^{-1/6}}{\sqrt{2\pi c(1-c)n}} \cdot e^{nH(c)}.
\end{aligned}$$

Remarking that  $\sqrt{2c(1-c)} \leq 1/\sqrt{2}$  for any  $c \in (0, 1)$ , we finally obtain with  $cn = s$ :

$$\mathbb{P}(S_n = s) \geq e^{-1/6} \sqrt{\frac{2}{n\pi}} \cdot e^{-n \text{kl}\left(\frac{1-\alpha\Delta}{2}, \frac{1+\Delta}{2}\right)} = e^{-1/6} \sqrt{\frac{2}{n\pi}} \exp\left(-n \cdot \Delta \log\left(1 + \frac{2\Delta}{1-\Delta}\right)\right).$$

□

## C.2 Sufficient conditions on $n_0$ and $n_1$ for $\mathcal{S}_0 \cap \mathcal{S}_1 \subset \mathcal{S}$

**Lemma 7.** Fix any  $\varepsilon \in (0, 1)$ , and define  $n_0, n_1$  as follows:

$$\begin{aligned}
n_0 &= \left\lceil \frac{1}{\eta} \cdot \frac{K}{K-1} \cdot \log\left(\frac{1}{\varepsilon \cdot (K-1)}\right) \right\rceil \vee \left\lceil \frac{1}{\eta} \left(\frac{K}{K-1}\right)^2 \log\left(\frac{K^3 n_1}{(K-1)^2}\right) \right\rceil, \\
n_1 &= \left\lceil \frac{K-1}{K} \cdot \frac{\log(2T/(K-1))}{\eta \Delta(1-\varepsilon)} + \frac{2}{\Delta} \right\rceil.
\end{aligned}$$

Then under  $\mathcal{S}_0 \cap \mathcal{S}_1$ , it holds that  $\tilde{p}_{n_0+n_1+1} \leq \frac{1}{2T}$ .

*Proof.* Using the same notation as  $\tilde{p}_{n+1}$ , let  $\tilde{\theta}_{n+1}$  be the the SGB parameter of arm 1 after its  $n$  first pulls.

First, at the end of phase 0 the policy has received  $n_0$  rewards of  $-1$  from arm 1. Therefore, since  $1 - \tilde{p}_n \geq 1 - \frac{1}{K} = \frac{K-1}{K}$  for all  $n \leq n_0$ , we have that

$$\tilde{\theta}_{n_0+1} = -\eta \sum_{n=1}^{n_0} (1 - \tilde{p}_n) \leq -\frac{K-1}{K} \cdot \eta n_0. \quad (16)$$

Next, we show that the combination of this property and the events occurring under  $\mathcal{S}_1$  are sufficient to prove the desired result. Indeed, we recall that under  $\mathcal{S}_1$ , the sequence of rewards in phase 1,  $\{\tilde{R}_t\}_{t=n_0+1}^{n_0+n_1}$ , satisfy the following two conditions:

- The total number of  $+1$  rewards should be less than  $\frac{1-\alpha\Delta}{2} \cdot n_1$  and the total number of  $-1$  rewards should be more than  $\frac{1+\alpha\Delta}{2} \cdot n_1$ ; i.e.  $\sum_{t=n_0+1}^{n_0+n_1} \tilde{R}_t \leq -n_1 \alpha \Delta$ .
- There should never be more  $+1$  rewards than  $-1$  rewards observed at the current time step within the phase; i.e.  $\sum_{t=n_0+1}^{n_0+k} \tilde{R}_t \leq 0$  for all  $k \leq n_1$ .

The rest of the proof is based on characterizing the sequence among all sequences satisfying the above conditions that leads to the largest value for  $\tilde{\theta}_{n_0+n_1+1}$ . We call this the *maximizing* sequence. Then, we show that even for that sequence it holds that  $\tilde{p}_{n_0+n_1+1} \leq \frac{1}{2T}$ , from which the result of the lemma follows. We detail below the lemmas that lead us to this result.

In Lemma 8, we give a general construction for the maximising sequence that applies to reward sequences satisfying the above conditions for arbitrary initial parameter. Then, in Corollary 2, we show that under the occurrence of phase 0, the maximising sequence of rewards with initial parameter  $\tilde{\theta}_{n_0+1}$  takes a simple form: a first period alternating  $-1$  and  $+1$  rewards followed by a second period

with only  $-1$  rewards. From this simple form, we can upper-bound  $\tilde{\theta}_{n_0+n_1+1}$  for the maximising sequence (also Corollary 2). Then, in Lemma 9, we show that the proposed tuning for  $n_0$  and  $n_1$  is sufficient to get that the probability  $\tilde{p}_{n_0+n_1+1}$  is smaller than  $\frac{1}{2T}$ .

1273

□

From a high-level perspective, we highlight that the phase  $\mathcal{S}_0$  serves to mitigate the impact of the order in which rewards are received in the SGB updates, by ensuring that  $\tilde{\theta}_{n_0+t}$  remains “sufficiently” negative throughout the entire phase 1 (i.e. for  $t \leq n_1$ ), while the tuning  $n_1 = \mathcal{O}(\log(T))$  permits that a probability of  $\frac{1}{2T}$  is achieved even in the identified maximizing scenario.

### 1278 C.2.1 Maximizing reward sequence and probability under $\mathcal{S}_0 \cap \mathcal{S}_1$

In this section, we consider reward sequences under  $\mathcal{S}_1$  and characterize the maximizing sequence for any arbitrary parameter at the start of phase 1.

**Definition 1** (Constrained trajectories). *Let  $\mathcal{Z} \subset \{-1, 1\}^{\mathbb{N}}$  be the subset of trajectories of rewards  $-1$  and  $+1$  that satisfy the conditions imposed under  $\mathcal{S}_1$ . Let  $S_n$  be a finite trajectory of  $n$  rewards  $\{R_1, \dots, R_n\} \in \mathcal{Z}$ , the feasibility indices  $I_+^{\mathcal{Z}}$  and  $I_-^{\mathcal{Z}}$  for the  $n+1$ -th reward are the functions satisfying:*

$$I_+^{\mathcal{Z}}(S_n) = \mathbb{1}(\{R_1, \dots, R_n, +1\} \in \mathcal{Z}), \text{ and}$$

$$I_-^{\mathcal{Z}}(S_n) = \mathbb{1}(\{R_1, \dots, R_n, -1\} \in \mathcal{Z}).$$

In particular, for  $n < n_1$ ,  $I_+^{\mathcal{Z}}(S_n) = 1$  if

- the number of  $+1$  rewards in  $S_n$  is less than  $\frac{1-\alpha\Delta}{2} \cdot n_1$ .
- the number of  $+1$  rewards in  $S_n$  is less than the number of  $-1$  rewards in  $S_n$ .

And  $I_-^{\mathcal{Z}}(S_n) = 1$  if the number of  $-1$  rewards in  $S_n$  is less than  $\frac{1+\alpha\Delta}{2} \cdot n_1$ .

In words, the feasibility indices formalize whether a reward of  $+1$  or  $-1$  can complete or not a sequence of rewards that should verify the constraints imposed under  $\mathcal{S}_1$ . We now prove the following characterization of the maximising reward sequence.

**Lemma 8.** Fix  $\tilde{\theta}_1 \in \mathbb{R}^K$ . Consider  $\{\tilde{R}_t^M\}_{t=1}^{n_1} \in \mathcal{Z}$  defined as follows with  $S_t^M = \{\tilde{R}_1^M, \dots, \tilde{R}_t^M\}$ :

$$\tilde{R}_t^M = \begin{cases} -1, & \text{if } \{\tilde{\theta}_t^M > \frac{K-1}{K} \log(K-1) \text{ and } I_-^{\mathcal{Z}}(S_{t-1}^M) = 1\} \text{ or } I_+^{\mathcal{Z}}(S_{t-1}^M) = 0 \\ +1, & \text{if } \{\tilde{\theta}_t^M < \frac{K-1}{K} \log(K-1) \text{ and } I_+^{\mathcal{Z}}(S_{t-1}^M) = 1\} \text{ or } I_-^{\mathcal{Z}}(S_{t-1}^M) = 0 \\ +1 \text{ or } -1, & \text{otherwise (the case where } \tilde{\theta}_t^M = \frac{K-1}{K} \log(K-1) \text{ and either is fine).} \end{cases}$$

Then  $\{\tilde{R}_t^M\}_{t=1}^{n_1}$  is the maximizing sequence for the SGB parameter of arm 1, i.e. it holds that  $\tilde{\theta}_{n_1+1}^M \geq \tilde{\theta}_{n_1+1}$ , for  $\tilde{\theta}_{n_1+1}$  obtained from  $\{\tilde{R}_t^M\}_{t=1}^{n_1}$  and any  $\tilde{\theta}_{n_1+1}$  obtained from a trajectory  $\{\tilde{R}_t\}_{t=1}^{n_1} \in \mathcal{Z}$ , both starting from  $\tilde{\theta}_1$ .

*Proof of Lemma 8.* Assume  $\{\tilde{R}_t^M\}_{t=1}^{n_1}$  is not the sequence that maximizes  $\tilde{\theta}_{n_1+1}$ . Denote the maximum by  $\tilde{\theta}_{n_1+1}^W$  with reward sequence  $\{\tilde{R}_t^W\}_{t=1}^{n_1} \in \mathcal{Z}$  and corresponding  $\tilde{\theta}_t^W / S_t^W$ . Since  $\{\tilde{R}_t^W\}_{t=1}^{n_1}$  is different from  $\{\tilde{R}_t^M\}_{t=1}^{n_1}$ , there exists some  $n$  such that one of the conditions in the construction of  $\tilde{R}_n^M$  is violated, so either

1.  $\tilde{R}_n^W = +1, \tilde{\theta}_n^W > \frac{K-1}{K} \log(K-1)$  and  $I_-^{\mathcal{Z}}(S_{n-1}^W) = 1$ .
2.  $\tilde{R}_n^W = -1, \tilde{\theta}_n^W < \frac{K-1}{K} \log(K-1)$  and  $I_+^{\mathcal{Z}}(S_{n-1}^W) = 1$ .
3.  $\tilde{R}_n^W = +1$  and  $I_+^{\mathcal{Z}}(S_{n-1}^W) = 0$ .
4.  $\tilde{R}_n^W = -1$  and  $I_-^{\mathcal{Z}}(S_{n-1}^W) = 0$ .

1304 The last two violations cannot occur since  $\{\tilde{R}_t^W\}_{t=1}^{n_1} \in \mathcal{Z}$ . Denote  $m$  the largest such  $n$ . Then  
 1305 handling the first two cases separately, we have

1306 1.  $\tilde{R}_m^W = +1$ ,  $\tilde{\theta}_m^W > \frac{K-1}{K} \log(K-1)$  and  $I_-^{\mathcal{Z}}(S_{m-1}^W) = 1$ . We must have  $\tilde{R}_{m+1}^W = -1$ .  
 1307 Suppose not: if  $\tilde{R}_{m+1}^W = +1$ , then since  $I_-^{\mathcal{Z}}(S_m^W) = 1$  and  $\tilde{\theta}_{m+1}^W \geq \tilde{\theta}_m^W > \frac{K-1}{K} \log(K-1)$ ,  
 1308  $m$  would not be the largest such that condition 1. is satisfied. Now consider an alternative  
 1309 sequence  $\hat{R}_n^W$  in  $\mathcal{Z}$  defined as follows:

$$\hat{R}_n^W = \begin{cases} \tilde{R}_n^W, & \text{if } n \neq m, m+1 \\ -1, & \text{if } n = m \\ +1, & \text{if } n = m+1 \end{cases}$$

1310 Let  $\hat{\theta}_n^W$  correspond to the sequence of parameters with rewards  $\hat{R}_n^W$ . By Lemma 10:

$$\hat{\theta}_{n+2}^W < \hat{\theta}_{n+1}^W.$$

1311 Since  $\hat{R}_n^W = \tilde{R}_n^W$  for all  $n > m+1$ , we end up with  $\hat{\theta}_{n+1}^W > \tilde{\theta}_{n+1}^W$  contradicting that  
 1312  $\tilde{\theta}_{n+1}^W$  is the maximum.

1313 2.  $\tilde{R}_m^W = -1$ ,  $\tilde{\theta}_m^W < \frac{K-1}{K} \log(K-1)$  and  $I_+^{\mathcal{Z}}(S_{m-1}^W) = 1$ . We must have  $\tilde{R}_{m+1}^W = +1$ .  
 1314 Suppose not: if  $\tilde{R}_{m+1}^W = -1$ , then since  $I_+^{\mathcal{Z}}(S_m^W) = 1$  and  $\tilde{\theta}_{m+1}^W \leq \tilde{\theta}_m^W < \frac{K-1}{K} \log(K-1)$ ,  
 1315  $m$  would not be the largest such that condition 2. is satisfied. Now consider an alternative  
 1316 sequence  $\hat{R}_n^W$  in  $\mathcal{Z}$  defined as follows:

$$\hat{R}_n^W = \begin{cases} \tilde{R}_n^W, & \text{if } n \neq m, m+1 \\ +1, & \text{if } n = m \\ -1, & \text{if } n = m+1 \end{cases}$$

1317 Let  $\hat{\theta}_n^W$  correspond to the sequence of parameters with rewards  $\hat{R}_n^W$ . By Lemma 10:

$$\hat{\theta}_{n+2}^W < \hat{\theta}_{n+1}^W.$$

1318 Since  $\hat{R}_n^W = \tilde{R}_n^W$  for all  $n > m+1$ , we end up with  $\hat{\theta}_{n+1}^W > \tilde{\theta}_{n+1}^W$  contradicting that  
 1319  $\tilde{\theta}_{n+1}^W$  is the maximum.

1320 In both cases, we get a contradiction, therefore  $\{\tilde{R}_t^W\}_{t=1}^{n_1}$  cannot be the maximizing sequence. Since  
 1321 this holds for any sequence different from  $\{\tilde{R}_t^M\}_{t=1}^{n_1}$ ,  $\{\tilde{R}_t^M\}_{t=1}^{n_1}$  is the maximizing sequence. We  
 1322 refer to the end of this section for the statement of Lemma 10 and its proof.  $\square$

1323 The next corollary characterizes the maximal possible value of parameter  $\tilde{\theta}_{n_0+n_1+1}$ , under event  
 1324  $\mathcal{S}_0 \cap \mathcal{S}_1$  by applying Lemma 8 under the occurrence of the event  $\mathcal{S}_0$ .

1325 **Corollary 2.** Assume  $\tilde{\theta}_1 \leq -\frac{K-1}{K} \cdot \eta n_0$  and  $n_0 \geq \frac{1}{\eta} \left(\frac{K}{K-1}\right)^2 \log\left(\frac{K^3 n_1}{(K-1)^2}\right)$ . Then it holds that

$$\tilde{\theta}_{n_1+1} \leq \tilde{\theta}_{n_1+1}^M \leq -\eta \alpha \Delta n_1 \cdot \left(1 - \frac{1}{K-1} e^{-\frac{K-1}{K} \eta n_0}\right)$$

1326 with  $\tilde{\theta}_{n_1+1}^M$  being the parameter obtained with the following reward sequence

$$\tilde{R}_{nt}^M = \begin{cases} (-1)^t, & \text{if } t \leq (1 - \alpha \Delta) \cdot n_1, \\ -1, & \text{otherwise.} \end{cases}$$

1327 The above corollary highlights the role of phase 0 in ensuring that  $\tilde{\theta}_1$  is small enough so that  
 1328  $\tilde{\theta}_t^M < \frac{K-1}{K} \log(K-1)$  for all  $t$  in the trajectory despite the asymmetry of the SGB update.

1329 *Proof of Corollary 2.* By Definition 1,  $I_+^{\mathcal{Z}}(S_{t-1}^M) = 0$  if either

- the number of +1 rewards up to time  $t$  of phase 1 is  $\frac{1-\alpha\Delta}{2} \cdot n_1$
- the same number of +1 and -1 rewards have been observed up to time  $t$  of phase 1.

We assumed that  $\tilde{\theta}_1 \leq -\frac{K-1}{K} \cdot \eta m_0 < 0 < \frac{K-1}{K} \log(K-1)$ . From Lemma 8, we have that as long as  $\tilde{\theta}_t < \frac{K-1}{K} \log(K-1)$  and  $I_+^Z(S_{t-1}^M) = 1$ , then  $\tilde{R}_t^M = +1$ . However, since  $I_+^Z(S_{t-1}^M) = 0$  when the same number of +1 and -1 rewards have been observed up to time  $t$  of phase 1, this leads to an alternation of -1 and +1:  $\tilde{R}_t^M = (-1)^t$ .

This alternation of -1 and +1 rewards continues until either the parameter  $\tilde{\theta}_t$  becomes greater than  $\frac{K-1}{K} \log(K-1)$  or receiving rewards of +1 stops being possible ( $I_+^Z(S_{t-1}^M) = 0$ ) because the number of +1 rewards up to time  $t$  of phase 1 is  $\frac{1-\alpha\Delta}{2} \cdot n_1$  (this will occur before  $t = n_1$ ). The former could happen because of the asymmetry of the SGB update. However, we now show that if  $n_0$  is large enough / phase 0 is long enough so that  $\tilde{\theta}_1$  is small enough then the asymmetry can be handled so that  $\theta_t$  remains negative.

*Intermediate claim:* If  $n_0 \geq \frac{1}{\eta} \left( \frac{K}{K-1} \right)^2 \log \left( \frac{K^3 n_1}{(K-1)^2} \right)$ , then  $\tilde{\theta}_{2n+1}^M \leq \frac{K-1}{K} \tilde{\theta}_1 < 0$  for all  $n \leq \frac{1-\alpha\Delta}{2} \cdot n_1$ .

We prove the intermediate claim by induction. Recall that the SGB update is  $\tilde{\theta}_{t+1} = \tilde{\theta}_t + \eta(1 - \tilde{p}_t) \cdot \tilde{R}_t$ . A positive reward increases the parameter value and a negative reward decreases it.

Base case  $n = 0$  follows from  $\tilde{\theta}_1 \leq 0 \implies \tilde{\theta}_1 \leq \frac{K-1}{K} \tilde{\theta}_1$ .

Inductive step: assume true for all  $k \leq n < \frac{1-\alpha\Delta}{2} \cdot n_1$ . Then  $\tilde{R}_t^M = (-1)^t$  for all  $t \leq 2(n+1)$  (the alternating sequence has not stopped since  $n < \frac{1-\alpha\Delta}{2} \cdot n_1$  so not all +1 rewards have been observed and the parameter has remained negative throughout). We have:

$$\begin{aligned} \tilde{\theta}_{2(n+1)+1}^M &= \tilde{\theta}_1 + \sum_{t=1}^{2(n+1)} (1 - \tilde{p}_t^M) \cdot \tilde{R}_t^M \\ &= \tilde{\theta}_1 + \eta \sum_{k=1}^{n+1} \left\{ (1 - \tilde{p}_{2k}^M) - (1 - \tilde{p}_{2k-1}^M) \right\} \\ &= \tilde{\theta}_1 + \eta \sum_{k=1}^{n+1} \left\{ \tilde{p}_{2k-1}^M - \tilde{p}_{2k}^M \right\}. \end{aligned}$$

Note that  $\tilde{\theta}_{2k}^M = \tilde{\theta}_{2k-1}^M - \eta(1 - \tilde{p}_{2k-1}^M) < \tilde{\theta}_{2k}^M$  since  $\tilde{R}_{2k-1}^M = -1$ . Therefore the sum appearing in the above expression is positive. It stems from the asymmetry of the SGB update. The presence of phase 0 makes  $\tilde{\theta}_1$  small enough such that this asymmetry is not too significant keeping  $\tilde{\theta}_{2(n+1)+1}^M$  of the same order as  $\tilde{\theta}_1$ . Specifically, we have

$$\begin{aligned} \tilde{p}_{2k-1}^M - \tilde{p}_{2k}^M &= \frac{1}{1 + (K-1) \cdot e^{-\frac{K}{K-1} \tilde{\theta}_{2k-1}^M}} - \frac{1}{1 + (K-1) \cdot e^{-\frac{K}{K-1} \tilde{\theta}_{2k}^M}} \\ &= (K-1) \cdot \frac{e^{-\frac{K}{K-1} \tilde{\theta}_{2k}^M} - e^{-\frac{K}{K-1} \tilde{\theta}_{2k-1}^M}}{(1 + (K-1) e^{-\frac{K}{K-1} \tilde{\theta}_{2k-1}^M})(1 + (K-1) e^{-\frac{K}{K-1} \tilde{\theta}_{2k}^M})} \\ &= \frac{(K-1) e^{-\frac{K}{K-1} \tilde{\theta}_{2k-1}^M}}{1 + (K-1) e^{-\frac{K}{K-1} \tilde{\theta}_{2k-1}^M}} \cdot \frac{1}{1 + (K-1) e^{-\frac{K}{K-1} \tilde{\theta}_{2k}^M}} \cdot \left( e^{\frac{K}{K-1} (\tilde{\theta}_{2k-1}^M - \tilde{\theta}_{2k}^M)} - 1 \right) \\ &\leq \frac{1}{K-1} \exp \left( \frac{K}{K-1} \tilde{\theta}_{2k-1}^M \right) \\ &\leq \exp(\tilde{\theta}_1) \quad \text{by the inductive hypothesis} \\ \implies \tilde{\theta}_{2(n+1)+1}^M &\leq \tilde{\theta}_1 + \eta(n+1) e^{\tilde{\theta}_1} \leq \frac{K-1}{K} \tilde{\theta}_1. \end{aligned}$$

1354 The last inequality follows from

$$\begin{aligned}
n_0 &\geq \frac{1}{\eta} \left( \frac{K}{K-1} \right)^2 \log \left( \frac{K^3 n_1}{(K-1)^2} \right) \implies \frac{K^3}{(K-1)^2} n_1 \leq n_0 e^{\eta n_0 (K-1)^2 / K^2} \\
&\implies \eta n_1 \leq \frac{1}{K} \left( n_0 \eta \frac{(K-1)^2}{K^2} \right) e^{-\tilde{\theta}_1} \quad \text{using } \tilde{\theta}_1 \leq - \left( \frac{K-1}{K} \right)^2 \eta n_0 \\
&\implies \eta n_1 e^{\tilde{\theta}_1} \leq - \frac{1}{K} \tilde{\theta}_1 \quad \text{using again } \tilde{\theta}_1 \leq - \left( \frac{K-1}{K} \right)^2 \eta n_0 \\
&\implies \eta(n+1) e^{\tilde{\theta}_1} \leq - \frac{1}{K} \tilde{\theta}_1,
\end{aligned}$$

1355 using that  $n \leq \frac{1-\alpha\Delta}{2} \cdot n_1 < \frac{n_1}{2} \leq n_1 - 1$ . This completes the proof of the intermediate claim.

1356 The claim implies that throughout the alternating sequence of  $-1$  and  $+1$  rewards, the parameter  $\tilde{\theta}_t$   
1357 remains negative and that observing all the  $+1$  rewards causes the alternating sequence to terminate.  
1358 We have that  $\tilde{R}_t^M = (-1)^t$  lasts until we have observed at most  $\frac{1-\alpha\Delta}{2} \cdot n_1$  rewards of  $+1$  after  
1359 which  $I_+^Z(S_{t-1}^M) = 0$  for all remaining rounds and therefore the remaining rewards in the maximizing  
1360 sequence are all  $-1$ .

1361 When the alternation ends, by the above claim we have that after receiving  $t_0 = (1 - \alpha\Delta) \cdot n_1$   
1362 samples, it holds that  $\tilde{\theta}_{2n+1}^M \leq \frac{K-1}{K} \tilde{\theta}_1 \leq - \left( \frac{K-1}{K} \right)^2 \eta n_0$ . There are  $n_1 - t_0 = \alpha\Delta n_1$  rounds left in  
1363 the phase, all of which have a reward of  $-1$ . Hence we have

$$\tilde{p}_{t_0+t}^M \leq \frac{1}{K-1} e^{\frac{K-1}{K-1} \tilde{\theta}_{t_0+t}^M} \leq \frac{1}{K-1} e^{\frac{K-1}{K-1} \tilde{\theta}_{t_0}^M} \leq \frac{1}{K-1} e^{-\frac{K-1}{K} \eta n_0}.$$

1364 Fixing  $\delta_0 = \frac{1}{K-1} e^{-\frac{K-1}{K} \eta n_0}$ , we have:

$$\begin{aligned}
\tilde{\theta}_{n_1+1}^M &= \theta_{t_0+(n_1-t_0)+1}^M \\
&= \tilde{\theta}_{t_0+1}^M - \eta \sum_{k=t_0+1}^{n_1} (1 - \tilde{p}_k^M) \\
&\leq -\eta(n_1 - t_0)(1 - \delta_0) \\
&= -\eta\alpha\Delta n_1(1 - \delta_0) \\
&\implies \tilde{\theta}_{n_1+1}^M \leq -\eta\alpha\Delta n_1(1 - \delta_0).
\end{aligned}$$

1365

□

1366 With the previous results at hand, we can finally obtain the sufficient condition on  $n_0$  and  $n_1$  to  
1367 guarantee that  $\mathcal{S}_0 \cap \mathcal{S}_1 \subset \mathcal{S}$ .

1368 **Lemma 9.** Fix any  $\varepsilon \in (0, 1)$ , and define  $n_0, n_1$  as follows:

$$\begin{aligned}
n_0 &= \left\lceil \frac{1}{\eta} \cdot \frac{K}{K-1} \cdot \log \left( \frac{1}{\varepsilon \cdot (K-1)} \right) \right\rceil \vee \left\lceil \frac{1}{\eta} \left( \frac{K}{K-1} \right)^2 \log \left( \frac{K^3 n_1}{(K-1)^2} \right) \right\rceil, \\
n_1 &= \left\lceil \frac{K-1}{K} \cdot \frac{\log(2T/(K-1))}{\eta\Delta(1-\varepsilon)} + \frac{2}{\Delta} \right\rceil.
\end{aligned}$$

1369 Then under  $\mathcal{S}_0 \cap \mathcal{S}_1$ , it holds that  $\tilde{p}_{n_0+n_1+1} \leq \frac{1}{2T}$ .

1370 *Proof.* Under  $\mathcal{S}_0$ , we have that  $\tilde{\theta}_{n_0+1}^M \leq -\frac{K-1}{K} \cdot \eta n_0$  and by construction,

$$n_0 \geq \frac{1}{\eta} \cdot \left( \frac{K}{K-1} \right)^2 \cdot \log \left( \frac{K^3 n_1}{(K-1)^2} \right).$$

1371 Therefore, we apply Corollary 2 on the rewards in phase 1, which gives

$$\begin{aligned}
\tilde{\theta}_{n_0+n_1+1} &\leq -\eta\alpha\Delta n_1 \left(1 - \frac{1}{K-1} e^{-\frac{K-1}{K}\eta n_0}\right) \\
&\leq -\eta\alpha\Delta(1-\varepsilon)n_1 \quad \text{since } n_0 \geq \frac{1}{\eta} \cdot \frac{K}{K-1} \cdot \log\left(\frac{1}{\varepsilon \cdot (K-1)}\right) \\
&\leq -\eta\Delta(1-\varepsilon)n_1 + 2\eta(1-\varepsilon) \quad \text{since } \alpha > 1 - \frac{2}{\Delta n_1} \\
&\leq -\frac{K}{K-1} \log\left(\frac{2T}{K-1}\right) \quad \text{since } n_1 \geq \frac{K-1}{K} \cdot \frac{\log(2T/(K-1))}{\eta\Delta(1-\varepsilon)} + \frac{2}{\Delta} \\
\Rightarrow \tilde{p}_{n_0+n_1+1} &= \frac{e^{\tilde{\theta}_{n_0+n_1+1}}}{e^{\tilde{\theta}_{n_0+n_1+1}} + (K-1)e^{-\frac{\tilde{\theta}_{n_0+n_1+1}}{K-1}}} \leq \frac{e^{\frac{K-1}{K} \cdot \tilde{\theta}_{n_0+n_1+1}}}{(K-1)} \leq \frac{1}{2T}.
\end{aligned}$$

1372

□

1373 We conclude this section with Lemma 10, which is the last technical result supporting the proof of  
1374 Lemma 7

1375 **Lemma 10.** Consider an arbitrary parameter  $\theta_n$  for SGB at the  $n$ -th pull of arm 1 (and the parameters  
1376 of all other arms are the same and equal to  $-\frac{1}{K-1}\theta_n$ ). Let  $R_k \in \{-1, 1\}$  be the reward for the  $k$ -th  
1377 pull. Let  $\theta_{n+2}$  correspond to the case where  $R_n = 1, R_{n+1} = -1$  and  $\tilde{\theta}_{n+2}$  correspond to the case  
1378 where  $R_n = -1, R_{n+1} = 1$ .

- 1379 • If  $\theta_n > \frac{K-1}{K} \log(K-1)$ ,  $\theta_{n+2} < \tilde{\theta}_{n+2}$
- 1380 • If  $\theta_n = \frac{K-1}{K} \log(K-1)$ ,  $\tilde{\theta}_{n+2} = \theta_{n+2}$
- 1381 • If  $\theta_n < \frac{K-1}{K} \log(K-1)$ ,  $\theta_{n+2} > \tilde{\theta}_{n+2}$

*Proof of Lemma 10.*

$$\begin{aligned}
\tilde{\theta}_{n+2} &= \theta_n - \eta(1-p_n) + \eta(1-\tilde{p}_{n+1}) = \theta_n - \eta(1-p_n) + \eta \frac{K-1}{K-1 + \exp(\frac{K-1}{K-1}\tilde{\theta}_{n+1})} \\
&= \theta_n - \eta(1-p_n) + \eta \frac{K-1}{K-1 + \exp(\frac{K-1}{K-1}\theta_n - \frac{K-1}{K-1}\eta(1-p_n))} \\
\theta_{n+2} &= \theta_n + \eta(1-p_n) - \eta(1-p_{n+1}) = \theta_n + \eta(1-p_n) - \eta \frac{K-1}{K-1 + \exp(\frac{K-1}{K-1}\theta_{n+1})} \\
&= \theta_n + \eta(1-p_n) - \eta \frac{K-1}{K-1 + \exp(\frac{K-1}{K-1}\theta_n + \frac{K-1}{K-1}\eta(1-p_n))} \\
\Rightarrow \theta_{n+2} - \tilde{\theta}_{n+2} &= 2\eta(1-p_n) - \eta \frac{K-1}{K-1 + \exp(\frac{K-1}{K-1}\theta_n + \frac{K-1}{K-1}\eta(1-p_n))} \\
&\quad - \eta \frac{K-1}{K-1 + \exp(\frac{K-1}{K-1}\theta_n - \frac{K-1}{K-1}\eta(1-p_n))}.
\end{aligned}$$

1382 Using that  $1-p_n = \frac{K-1}{K-1 + \exp(\frac{K-1}{K-1}\theta_n)}$ , consider the function

$$\begin{aligned}
f(x) &= \frac{2\eta(K-1)}{K-1 + \exp(x)} - \frac{\eta(K-1)}{K-1 + \exp(x + \frac{K}{K-1} \frac{\eta(K-1)}{K-1 + \exp(x)})} \\
&\quad - \frac{\eta(K-1)}{K-1 + \exp(x - \frac{K}{K-1} \frac{\eta(K-1)}{K-1 + \exp(x)})}.
\end{aligned}$$

1383 Then denoting  $Y = \exp(\frac{K}{K-1} \frac{\eta(K-1)}{K-1+\exp(x)})$  and  $Z = K - 1$ ,

$$\begin{aligned}
f(x) > 0 &\iff \frac{2}{K-1+\exp(x)} > \frac{1}{K-1+\exp(x+\frac{K}{K-1}\frac{\eta(K-1)}{K-1+\exp(x)})} \\
&\quad + \frac{1}{K-1+\exp(x-\frac{K}{K-1}\frac{\eta(K-1)}{K-1+\exp(x)})} \\
&\iff \frac{2}{Z+\exp(x)} > \frac{1}{Z+Y\exp(x)} + \frac{1}{Z+\frac{1}{Y}\exp(x)} \\
&\iff 2Z^2 + 2ZYe^x + \frac{2Z}{Y}e^x + 2e^{2x} > 2Z^2 + ZYe^x + \frac{Z}{Y}e^x + 2Ze^x + Ye^{2x} + \frac{1}{Y}e^{2x} \\
&\iff ZYe^x + \frac{Z}{Y}e^x + 2e^{2x} > 2Ze^x + Ye^{2x} + \frac{1}{Y}e^{2x} \\
&\iff ZY^2 + Z + 2Ye^x > 2ZY + Y^2e^x + e^x \\
&\iff (Y^2 - 2Y + 1)(Z - e^x) > 0 \\
&\iff (Y - 1)^2(Z - e^x) > 0 \\
&\iff x < \log Z = \log(K - 1).
\end{aligned}$$

1384 Similarly,  $f(x) < 0 \iff x > \log(K - 1)$  and  $f(x) = 0 \iff x = \log(K - 1)$ . Since  
1385  $f(\frac{K}{K-1}\theta_n) = \theta_{n+2} - \tilde{\theta}_{n+2}$ , we have the stated result.  $\square$

## 1386 D Supporting results for the proof of Theorem 3

1387 This section contains the classical lower bound results in bandits (appendix D.1) and the proof of  
1388 Lemma 1 (appendix D.2). The proof of Theorem 3 in the main paper is entirely based on the results  
1389 presented in this section.

### 1390 D.1 Details on asymptotic lower bounds in bandits with bounded-support

1391 We denote by  $\text{KL}(\cdot, \cdot)$  the Kullback-Leibler divergence between two distributions. We first recall the  
1392 classical result, first proved by Lai and Robbins [36] for parametric families of distributions, and later  
1393 extended by Burnetas and Katehakis [37] for non-parametric families.

1394 **Theorem 6** (Asymptotic problem-dependent regret lower bound [36, 37]). *Let  $\nu \in \mathcal{F}^K$  be a MAB*  
1395 *instance with distributions from the same family of distributions  $\mathcal{F}$ .*

1396 *A policy  $\pi$  is **uniformly efficient** on  $\mathcal{F}$  if for any instance  $\nu \in \mathcal{F}^K$  and  $\alpha > 0$ , any sub-optimal arm  $k$*   
1397 *(such that  $\Delta_k > 0$ ) satisfies  $\mathbb{E}_{\pi, \nu}[N_k(T)] = o(T^\alpha)$ . Any such policy must satisfy*

$$\liminf_{T \rightarrow \infty} \frac{\mathbb{E}[N_k(T)]}{\log(T)} \geq \frac{1}{\mathcal{K}_{\inf}^{\mathcal{F}}(\nu_k, \mu^*)}, \quad \mathcal{K}_{\inf}^{\mathcal{F}}(\nu_k, \mu^*) = \inf_{\nu' \in \mathcal{F}} \{\text{KL}(\nu_k, \nu') : \mathbb{E}_{X \sim \nu'}[X] > \mu^*\}, \quad (17)$$

1398 *for any sub-optimal arm  $k$ , and using the notation  $\mu^* = \max_{j \in [K]} \mu_j$ .*

1399 The above theorem holds for any generic family  $\mathcal{F}$ , but we recall that in this paper we use the notation  
1400  $\mathcal{F}$  specifically for the family of distributions supported on  $[-1, 1]$ . To prove Theorem 3, we use the  
1401 following immediate corollary of Theorem 6.

1402 **Corollary 3.** *Let  $\pi$  be a policy violating the lower bound of Theorem 6 (Eq. (17)), for some bandit*  
1403 *instance  $\nu \in \mathcal{F}^K$ . Then,  $\pi$  is not uniformly efficient on  $\mathcal{F}$ : there exists  $\alpha \in (0, 1]$  and another bandit*  
1404 *instance  $\nu' \in \mathcal{F}^K$  such that  $\mathcal{R}_T^\pi(\nu') = \Omega(T^\alpha)$ .*

1405 Since we apply this result on Dirac distributions, we use the following supporting lemma.

1406 **Lemma 11.** *Let  $\mu_0 \in [-1, 1]$  and  $\mu_1 \in [-1, 1]$  satisfying  $\mu_1 \geq \mu_0$ . Then,*

$$\mathcal{K}_{\inf}^{\mathcal{F}}(\delta_{\mu_0}, \mu_1) = \log \left( \frac{1 - \mu_0}{1 - \mu_1} \right).$$

1407 *Proof.* To turn the Dirac distribution of mean  $\mu_0$  into a distribution of mean  $\mu_1$  at minimum cost  
 1408 while keeping its support in  $[-1, 1]$ , the most efficient way is to transfer as little mass as possible in  
 1409  $+1$ . We thus solve

$$p \cdot \mu_0 + (1 - p) = \mu_1 \implies p = \frac{1 - \mu_1}{1 - \mu_0},$$

1410 which is the probability mass remaining in  $\mu_0$  after the transfer. This gives the result.  $\square$

1411 **Remark 1.** If the support  $[-R, R]$  for  $R > 0$ , and using the notation  $\mathcal{F}_{[-R, R]}$  for this family of  
 1412 distributions, we obtain

$$\mathcal{K}_{\inf}^{\mathcal{F}_{[-R, R]}}(\delta_{\mu_0}, \mu_1) = \frac{R - \mu_0}{R - \mu_1},$$

1413 so the thresholds of Theorem 3 are trivially multiplied by  $R$ , since  $\log(1 + \Delta)$  becomes  $\log(1 + \Delta/R)$   
 1414 in the lower bound.

1415 **Adaptation when  $\Delta$  is known** As discussed in Section 3.1, if it assumed that the minimum gap  $\Delta$   
 1416 is known, then the class of distributions considered is  $\mathcal{F}_{\Delta}^K$  instead of  $\mathcal{F}^K$ . This induces some changes  
 1417 in the information structure, which in turn imply that the lower bound is modified. Essentially, the  
 1418 knowledge of  $\Delta$  makes the problem easier, which increase the range of admissible learning rates in  
 1419 our results. We now state the result mirroring Theorem 3, before detailing supporting arguments.

1420 **Lemma 12** (Modified threshold for polynomial regret if  $\Delta$  is known). Assume that the minimum gap  
 1421  $\Delta \in (0, 1)$  is known, and that SGB is tuned with learning rate  $\eta > \frac{1}{2\sqrt{(K-1)}} \cdot \frac{\log(1 + \frac{2\Delta}{1-\Delta})}{\Delta} \approx \frac{2\eta_K}{1-\Delta}$ ,  
 1422 where  $\eta_K$  is the threshold established in Theorem 3.

1423 Then, there exists a bandit instance  $\nu \in \mathcal{F}_{\Delta}^K$  and  $\alpha > 0$  such that  $\mathcal{R}_T^{\text{SGB}}(\nu) = \Omega(T^\alpha)$ .

1424 *Proof.* The first step is to formalize how the additional gap information modifies the lower bound of  
 1425 Theorem 6.

1426 **Lemma 13** (Modified  $\mathcal{K}_{\inf}$  with knowledge of minimum gap). Let  $\mathcal{F}_{\Delta}^K$  denote the class of  $K$ -armed  
 1427 bandit instances with distributions bounded in  $[-1, 1]$  and with a minimal non-zero gap of  $\Delta$ . Then,  
 1428 the lower bound of Theorem 6 holds with the following divergence function,

$$\mathcal{K}_{\inf}^{\mathcal{F}_{\Delta}^K}(\nu_k, \mu^*) = \mathcal{K}_{\inf}^{\mathcal{F}}(\nu_k, \mu^* + \Delta).$$

1429 *Proof.* With knowledge of  $\Delta$ , a sub-optimal arm  $k$  can become **strictly** optimal only if its expectation  
 1430 is pushed to  $\mu^* + \Delta$ . The rest of the proof of Theorem 6 is then unchanged, see for instance the  
 1431 version of the proof presented in Section 1.2.1 of [64].  $\square$

1432 As a consequence, by Lemma 11 that the lower bound used to prove Theorem 3 should be changed to  
 1433  $\mathcal{K}_{\inf}^{\mathcal{F}_{\Delta}^K}(\delta_{-\Delta}, 0) = \mathcal{K}_{\inf}^{\mathcal{F}}(\delta_{-\Delta}, \Delta) = \log\left(1 + \frac{2\Delta}{1-\Delta}\right)$ . The result is then direct by plugging this bound  
 1434 in the proof of Theorem 3.  $\square$

1435 We can further remark that the new  $\mathcal{K}_{\inf}^{\mathcal{F}_{\Delta}^K}$  quantity is infinite if  $\mu^* \geq 1 - \Delta$ , which always hold  
 1436 if  $\Delta > 1$ . Indeed, if  $\Delta > 1$  then it is guaranteed that  $\max_{k: \mu_k < \mu^*} \mu_k < 0$  and  $\mu^* > 0$ , and as a  
 1437 consequence  $\mu^* + \Delta > 1$ . In that case, the regret does not need to be logarithmic: we could equip  
 1438 any policy with a supplementary greedy step that would play any arm with empirical mean larger  
 1439 than  $1 - \Delta$ . It is easy to verify that combining such step with e.g. uniform exploration (if no arm  
 1440 satisfy the condition) would guarantee constant regret on each instance from  $\mathcal{F}_{\Delta}^K$ , for instance by  
 1441 adapting the analysis from [65] on a similar problem constraint. Since this fact is not particularly  
 1442 insightful to understand the theoretical behavior of SGB, and the interesting scenarios arise when  $\Delta$   
 1443 is small, we chose to ignore this trick in the paper.

1444 **Summary of known properties of  $\mathcal{K}_{\inf}^{\mathcal{F}}$**  It is well known that for bounded distributions the quantity  
 1445  $\mathcal{K}_{\inf}^{\mathcal{F}}(\nu_k, \mu^*)$  can be expressed as the solution of an optimization problem, but is also related to the  
 1446 KL-divergence of Bernoulli distributions and to  $\Delta_k^2$ . We now elaborate on these results.

1447 Most existing results in the literature are derived for bounded distributions of support  $[0, 1]$  ([46, 30,  
 1448 66], among many others). We denote this family by  $\bar{\mathcal{F}}$ . Since the KL divergence is invariant by  
 1449 rescaling, it is clear that  $\mathcal{K}_{\inf}^{\mathcal{F}}$  and  $\mathcal{K}_{\inf}^{\bar{\mathcal{F}}}$  are related, more precisely

$$\forall (\nu, \mu) \in \mathcal{F} \times [-1, 1], \mathcal{K}_{\inf}^{\mathcal{F}}(\nu, \mu) = \mathcal{K}_{\inf}^{\bar{\mathcal{F}}}(\bar{\nu}, \bar{\mu}),$$

1450 with  $\bar{\mu} = \frac{1+\mu}{2}$  is the distribution of  $\frac{1+X}{2}$  for a random variable  $X \sim \nu$ , and similarly for  $\bar{\nu}$ . Honda  
 1451 and Takemura [46] derived the following expression,

$$\forall (\bar{\nu}, \bar{\mu}) \in \bar{\mathcal{F}} \times [0, 1], \mathcal{K}_{\inf}^{\bar{\mathcal{F}}}(\bar{\nu}, \bar{\mu}) = \sup_{\lambda \in [0, 1]} \mathbb{E}_{X \sim \bar{\nu}} \left[ \log \left( 1 - \lambda \frac{X - \bar{\mu}}{1 - \bar{\mu}} \right) \right].$$

1452 We further denote by  $\text{kl}$  the Bernoulli divergence, that can be expressed as

$$\forall (\mu_0, \mu_1) \in [0, 1], \text{kl}(\mu_0, \mu_1) = \mu_0 \log \left( \frac{\mu_0}{\mu_1} \right) + (1 - \mu_0) \log \left( \frac{1 - \mu_0}{1 - \mu_1} \right).$$

1453 Then, for any distribution  $\nu_0 \in \bar{\mathcal{F}}$  of mean  $\mu_0$  and  $\mu_1 \in [\mu_0, 1]$  it is established that

$$\mathcal{K}_{\inf}^{\bar{\mathcal{F}}}(\nu_0, \mu_1) \geq \text{kl}(\mu_0, \mu_1) \geq 2(\mu_1 - \mu_0)^2$$

1454 We refer to [66] for proofs and detailed discussions on the tightness of the inequalities. In particular,  
 1455 the inequalities are tight for Bernoulli instances with expectation near  $1/2$  and small gaps. This  
 1456 translates into the fact that, **on  $\mathcal{F}$ , the most difficult distributions are Rademacher with means**  
 1457 **near 0.**

1458 Hence, for problems from  $\mathcal{F}^K$  the regret of uniformly efficient policies is expected to scale in the  
 1459 worst case, as a function of the gap  $\Delta$ , with  $2(K-1) \cdot \frac{\log(T)}{\Delta}$ , which becomes  $\frac{(K-1)}{2\Delta} \cdot \log(T)$  if  $\Delta$  is  
 1460 assumed to be known, i.e.  $\nu \in \mathcal{F}_{\Delta}^K$ . This is nearly matched for an instance with  $K-1$  sub-optimal  
 1461 Rademacher arms of mean 0 (and so  $\mu_1 = \Delta$ ). We see that the results we obtained in Theorem 1 and  
 1462 Theorem 4 verify this property, and are thus coherent with the lower bound.

1463 To be more precise, the asymptotic scaling of the regret upper bound of Theorem 1 is  $\frac{\log(T)}{2\eta}$  for  
 1464 small enough learning rates, while the lower bound on the instance  $\nu_1 = \text{Rad}(\Delta)$ ,  $\nu_2 = \text{Rad}(0)$  is  
 1465  $\frac{2\Delta \log(T)}{-\log(1-4\Delta^2)}$ , so the two bounds can be arbitrarily close for  $\eta = \Delta e^{-2\Delta}$  (satisfying the condition of  
 1466 the theorem) and  $\Delta \rightarrow 0$ .

## 1467 D.2 Proof of Lemma 1

1468 We start by restating the result presented in the main paper.

1469 **Lemma 1** (Regret upper bound on an easy instance). *Let  $\nu \in \mathcal{F}^K$  be a MAB defined by  $\nu_1 = \delta_0$  and*  
 1470  *$\nu_2 = \dots = \nu_K = \delta_{-\Delta}$ , for some  $\Delta > 0$ . Then, for **any** learning rate  $\eta$ , SGB satisfies*

$$\forall \varepsilon \in (0, 1), \mathcal{R}_T^{\text{SGB}} \leq \frac{1 + \log(1 + (K-1)T\eta\Delta)}{(1-\varepsilon)\eta} + \frac{K^2}{\varepsilon} \cdot \left( \Delta + \frac{1}{\eta} \log \left( \frac{K}{\varepsilon} \right) \right).$$

1471 *Proof.* Since the probabilities are only updated when a sub-optimal arm is played, we introduce  
 1472 the notation  $(\tilde{p}_{k,N})_{N \in \mathbb{N}}$  to denote the sampling probabilities at the  $N$ -th pull of a sub-optimal arm.  
 1473 We use notation  $N_t = \sum_{k=2}^K N_k(t)$ , where we recall that, for  $k \in [K]$ ,  $N_k(t) = \sum_{s=1}^t \mathbb{1}(A_s = k)$ .  
 1474 Then, we can first remark that

$$\forall t \geq 1, \theta_{1,t+1} = \theta_{1,t} + p_{1,t} \cdot \eta \Delta \mathbb{1}(A_t \neq 1) \implies \theta_{1,t} = \eta \Delta \cdot \sum_{n=1}^{N_t} \tilde{p}_{1,n},$$

1475 On the other hand, the parameters of sub-optimal arms satisfy

$$\begin{aligned}
\forall k \geq 2, \theta_{k,t+1} &= \theta_{k,t} - \eta(1 - p_{k,t})\Delta \mathbb{1}(A_t = k) + \eta p_{k,t}\Delta \mathbb{1}(A_t \neq \{k, 1\}) \\
&= \theta_{k,t} - \eta\Delta \cdot ((1 - p_{k,t})\mathbb{1}(A_t = k) - p_{k,t}\mathbb{1}(A_t \neq \{k, 1\})) \\
&= \theta_{k,t} - \eta\Delta \cdot (\mathbb{1}(A_t = k) - p_{k,t}\mathbb{1}(A_t \neq 1)) \\
&\implies \theta_{k,t} = -\eta\Delta N_k(t) + \eta\Delta \sum_{n=1}^{N_t} \tilde{p}_{k,n}.
\end{aligned}$$

1476 Thus, we obtain that

$$\forall k \in \{2, \dots, K\}, \forall t \geq 1, \quad \theta_{1,t} - \theta_{k,t} = \eta\Delta N_k(t) + \eta\Delta \sum_{n=1}^{N_t} (\tilde{p}_{1,n} - \tilde{p}_{k,n}). \quad (18)$$

1477 We additionally prove that  $\tilde{p}_{1,n} \geq \max_{k \geq 2} \tilde{p}_{k,n}$  by induction: this is true at initialization because all  
1478 probabilities are equal. Then if the property holds for some time  $t \geq 1$ , it then holds that

$$\max_{k \in \{2, \dots, K\}} \delta\theta_{k,t} \leq \Delta \cdot \max_{k \neq 1} p_{k,t} \mathbb{1}(A_t \neq 1) \leq \Delta \cdot p_{1,t} \mathbb{1}(A_t \neq 1) = \delta\theta_{1,t},$$

1479 so  $\theta_{1,t+1} = \max_{j \in [K]} \theta_{j,t+1}$ , therefore  $p_{1,t+1}$  remains the maximum sampling probability at the  
1480 next step. We deduce that

$$\forall t \geq 1, \forall k \geq 2 : p_{k,t} \leq \frac{e^{\theta_{k,t}}}{e^{\theta_{1,t}}} = e^{-\eta\Delta N_k(t) - \eta\Delta \sum_{s=1}^{t-1} (p_{1,s} - p_{k,s}) \mathbb{1}(A_s \neq 1)} \leq e^{-\eta\Delta N_k(t)}. \quad (19)$$

1481 Consider  $\mathcal{T}_k = \{t \geq 1 : p_{k,t} \geq \varepsilon / K\}$ . From the last bound of (19), we first obtain that

$$N_k(t) \geq N_k^\varepsilon := \left\lceil \frac{1}{\eta\Delta} \cdot \log \left( \frac{K}{\varepsilon} \right) \right\rceil \implies \forall s \geq t : p_{k,s} \leq \frac{\varepsilon}{K}.$$

1482 Then,  $\mathbb{E}[|\mathcal{T}_k|]$  is trivially upper bounded by  $N_k^\varepsilon \cdot \frac{K}{\varepsilon}$ , by conditional independence of the number of  
1483 steps between two successive pulls of arm  $k$ . Thus, it holds that

$$\mathbb{E}[|\mathcal{T}_k|] \leq \frac{K}{\varepsilon \eta\Delta} \cdot \log \left( \frac{K}{\varepsilon} \right) + \frac{K}{\varepsilon}$$

1484 Now, considering  $\mathcal{T} = \cup_{k=2}^K \mathcal{T}_k$ , we can simply write that

$$\mathbb{E}[|\mathcal{T}|] \leq \sum_{k=2}^K \mathbb{E}[|\mathcal{T}_k|] \leq \frac{K(K-1)}{\varepsilon \eta\Delta} \log \left( \frac{K}{\varepsilon} \right) + \frac{K(K-1)}{\varepsilon}.$$

1485 We can now consider the number of sub-optimal pulls incurred for  $t \notin \mathcal{T}$ . We can get back to using  
1486 Eq. (19), but now exploiting the penultimate inequality with

$$p_{k,t} \leq e^{-\eta\Delta(N_k(t) + \sum_{s=1}^{t-1} (p_{1,s} - p_{k,s}) \mathbb{1}(A_s \neq 1))} \leq e^{-\eta\Delta(N_k(t) + \sum_{s=1}^{t-1} (1-\varepsilon) \mathbb{1}(A_s \neq 1, s \notin \mathcal{T}))},$$

1487 since by design  $t \notin \mathcal{T} \Rightarrow p_{1,t} - p_{k,t} = 1 - \sum_{k'=2}^K p_{k',t} - p_{k,t} \geq 1 - \varepsilon$ . We denote by  $\bar{\mathcal{T}}$  the  
1488 complementary of  $\mathcal{T}$  (so  $\mathcal{T} \cup \bar{\mathcal{T}} = [T]$  and  $\mathcal{T} \cap \bar{\mathcal{T}} = \emptyset$ ), and by  $\bar{N}_t$  the number of sub-optimal  
1489 pulls within this range, so  $\bar{N}_t = \sum_{s=1}^T \mathbb{1}(A_s \neq 1, s \notin \mathcal{T})$ . To obtain the result, we just ignore the  
1490  $N_k(t)$  term in the upper bound, and use a very standard proof scheme in bandits. We first define  
1491  $N_{\bar{\mathcal{T}}}^\varepsilon = \frac{\log(1 + (K-1)\eta\Delta T)}{(1-\varepsilon)\eta\Delta}$ , and obtain that

$$\begin{aligned}
\mathbb{E} \left[ \sum_{t=1, t \notin \mathcal{T}}^T \mathbb{1}(A_t \neq 1) \right] &= \mathbb{E}[\bar{N}_T] \\
&\leq \mathbb{E} \left[ \sum_{t \in \bar{\mathcal{T}} \cap [T]} \mathbb{1}(A_t \neq 1, \bar{N}_t \leq N_{\bar{\mathcal{T}}}^\varepsilon) + \sum_{t \in \bar{\mathcal{T}} \cap [T]} \mathbb{1}(A_t \neq 1, \bar{N}_t > N_{\bar{\mathcal{T}}}^\varepsilon) \right] \\
&\leq N_{\bar{\mathcal{T}}}^\varepsilon + T(K-1)e^{-\eta\Delta(1-\varepsilon)N_{\bar{\mathcal{T}}}^\varepsilon} \\
&\leq \frac{\log(1 + T(K-1)\eta\Delta)}{(1-\varepsilon)\eta\Delta} + \frac{(K-1)T}{1 + T(K-1)\eta\Delta} \\
&\leq \frac{1 + \log(1 + T(K-1)\eta\Delta)}{(1-\varepsilon)\eta\Delta},
\end{aligned}$$

1492 which concludes the proof since

$$\begin{aligned}
\mathcal{R}_T(\nu) &= \Delta \mathbb{E} \left[ \sum_{t=1}^T \mathbb{1}(A_t \neq 1) \right] = \Delta \mathbb{E} \left[ \sum_{t=1, t \notin \mathcal{T}}^T \mathbb{1}(A_t \neq 1) + \sum_{t=1, t \in \mathcal{T}}^T \mathbb{1}(A_t \neq 1) \right] \\
&\leq \frac{1 + \log(1 + T(K-1)\eta\Delta)}{(1-\varepsilon)\eta} + \Delta \mathbb{E}[|\mathcal{T}|] \\
&\leq \frac{1 + \log(1 + T(K-1)\eta\Delta)}{(1-\varepsilon)\eta} + \frac{K^2}{\varepsilon} \left( \Delta + \frac{1}{\eta} \log \left( \frac{K}{\varepsilon} \right) \right).
\end{aligned}$$

1493

□

1494 **Possible improvement** In the last steps of the proof of Lemma 1, we used Eq. (19) and ignored for  
1495 simplicity the  $N_k(t)$  term in the following bound

$$p_{k,t} \leq e^{-\eta\Delta(N_k(t) + \sum_{s=1}^t (1-\varepsilon)\mathbb{1}(A_s \neq 1, s \notin \mathcal{T}))}.$$

1496 Intuitively, the symmetry between the arms and the fact that the rewards are deterministic strongly  
1497 suggest that it should hold that  $N_k(t) \approx \frac{\bar{N}_t}{K-1}$  with high probability, at least when  $\bar{N}_t$  becomes large  
1498 enough. Hence, this suggest that we could decrease  $\bar{N}_T^\varepsilon$  by a factor  $\frac{K-1}{K}$ , and obtain a bound

$$\mathcal{R}_T \leq \frac{1}{1-\varepsilon} \cdot \frac{K-1}{K} \cdot \frac{\log(T)}{\eta} + A_\varepsilon,$$

1499 for some constant  $A_\varepsilon$ . Proving it for a general number of arms seems intricate. Furthermore, for large  
1500  $K$  the difference between the two results is minor –and our result already gives the inverse linear  
1501 dependency in  $K$ – so we leave further investigation for future works. However, we now prove this  
1502 improved bound for  $K = 2$  to formally justify this intuition, and support the proof of Theorem 3 in  
1503 the case  $K = 2$ . We can further remark that the improvement is not only on the  $1/2$  factor in front of  
1504 the logarithmic term, but also is the dependency in  $\varepsilon$ , which becomes  $\log(\frac{1}{\varepsilon})$  instead of  $\varepsilon^{-1}$ .

1505 **Lemma 14** (Improved upper bound on the easy instance for  $K = 2$ ). *Let  $\nu \in \mathcal{F}^K$  be a MAB defined*  
1506 *by  $\nu_1 = \delta_0$  and  $\nu_2 = \delta_{-\Delta}$ , for some  $\Delta > 0$ . Then, for **any** learning rate  $\eta$ , SGB satisfies*

$$\forall \varepsilon \in (0, 1), \quad \mathcal{R}_T \leq \frac{\log(1 + 2T\varepsilon(1-\varepsilon)\eta\Delta) + 1}{2(1-\varepsilon)\eta} + \frac{\log(\frac{1}{\varepsilon})}{\eta}.$$

1507 *Proof.* The improved result comes from the fact that for  $K = 2$ ,  $\theta_{1,t} = -\theta_{2,t}$  at all steps (Eq. (9)),  
1508 which simplifies several arguments. Let  $\tilde{\theta}_N$  denote the parameter of arm 1 after  $N$  pulls of arms 2.  
1509 Using that  $\inf_{t \geq 1} p_{1,t} = p_{1,1} = 1/2$ , we can now prove that a deterministic number of samples  $N_\varepsilon$   
1510 suffices to reach  $\tilde{p}_{1,N} \geq 1 - \varepsilon$ . Indeed, it holds that

$$1 - \tilde{p}_{N_\varepsilon} \leq e^{-2\tilde{\theta}_{N_\varepsilon}}, \quad \text{and} \quad \tilde{\theta}_{N_\varepsilon} \geq \frac{\eta\Delta N_\varepsilon}{2},$$

1511 from which we deduce that choosing  $N_\varepsilon = \frac{\log(\frac{1}{\varepsilon})}{\eta\Delta}$  is sufficient to guarantee that  $\inf_{N \geq N_\varepsilon} \tilde{p}_N \geq 1 - \varepsilon$ .  
1512 Let us now consider a number  $\bar{N}$  of selections of arm 2 after its  $N_\varepsilon$  first pulls. For  $N = N_\varepsilon + \bar{N} \geq N_\varepsilon$ ,  
1513 it then holds that

$$\tilde{\theta}_N \geq \tilde{\theta}_{N_\varepsilon} + \eta\Delta(1-\varepsilon)\bar{N},$$

1514 which yields  $1 - \tilde{p}_N \leq e^{-2\tilde{\theta}_N} \leq \varepsilon \cdot e^{-2\eta\Delta(1-\varepsilon)\bar{N}}$  by definition of  $N_\varepsilon$ . Using the same last steps as  
 1515 for the proof of Lemma 1, and choosing  $\bar{N} = \frac{\log(1+2T\varepsilon(1-\varepsilon)\eta\Delta)}{2(1-\varepsilon)\eta\Delta}$ , we then obtain that

$$\begin{aligned} \mathbb{E}[N_2(T)] &\leq \mathbb{E} \left[ \sum_{t=1}^T \mathbb{1}(A_t = 2, N_2(t) \leq N_\varepsilon + \bar{N}) + \sum_{t=1}^T \mathbb{1}(A_t = 2, N_2(t) > N_\varepsilon + \bar{N}) \right] \\ &\leq N_\varepsilon + \bar{N} + T\varepsilon \cdot e^{-2\eta\Delta(1-\varepsilon)\bar{N}} \\ &\leq \frac{\log(\frac{1}{\varepsilon})}{\eta\Delta} + \frac{\log(1+2T\varepsilon(1-\varepsilon)\eta\Delta)}{2(1-\varepsilon)\eta\Delta} + \frac{\varepsilon \cdot T}{1+2T\varepsilon(1-\varepsilon)\eta\Delta} \\ &\leq \frac{\log(1+2T\varepsilon(1-\varepsilon)\eta\Delta) + 1}{2(1-\varepsilon)\eta\Delta} + \frac{\log(\frac{1}{\varepsilon})}{\eta\Delta} \end{aligned}$$

1516 which gives the result.  $\square$

### 1517 D.3 Conjectures on the critical threshold for $K \geq 3$

1518 We recall that, by combining Theorem 2 and 3, we proved that  $\eta \lesssim \Delta \wedge K^{-1}$  is a necessary condition  
 1519 to guarantee logarithmic regret for SGB. We also hinted in the main paper (Section 3 and experiments  
 1520 of Section 4) that we believe that for general  $K$ -armed problems  $\eta$  should scale with  $\Delta/K$ , and more  
 1521 precisely that the critical learning rate is  $\eta = \frac{2\Delta}{K}$ . In this section, we formalize this conjecture, and  
 1522 present detailed justifications.

1523 **Conjecture 1.** For  $\Delta > 0$ , consider the instance  $\nu \in \mathcal{F}_\Delta^K$  defined by  $\nu_1 = \delta_0$  and  $\nu_2 = \dots = \nu_K =$   
 1524  $\text{Rad}(-\Delta)$ . Then, it holds that

$$\exists \eta_0 > \frac{2\Delta}{K} \text{ s.t. } , \forall \eta \in (0, \eta_0) : \mathcal{R}_T \leq \frac{K-1}{K} \cdot \frac{\log(T)}{\eta} + o(\log(T)). \quad (20)$$

1525 and, as a consequence, SGB can be uniformly efficient on all instances from  $\mathcal{F}_\Delta^K$  **only if**  $\eta \leq \frac{2\Delta}{K}$ .

1526 The empirical results presented in Section G.3 support this conjecture, and even suggest that the  
 1527 logarithmic bound on the post-convergence term is the same **for all problems**  $\nu \in \mathcal{F}_\Delta^K$  (Conjecture 3),  
 1528 although considering only the instance described in the conjecture is sufficient to discuss the critical  
 1529 threshold.

1530 We now formalize how Eq. (20) suffices to establish that the critical learning rate is smaller than  $\frac{2\Delta}{K}$ ,  
 1531 and describe the technical results that would be necessary to prove the conjecture.

1532 *Intuition.* Let us assume that Eq. (20) holds. Then, the deduction that  $\eta \leq \frac{2\Delta}{K}$  is necessary for SGB  
 1533 to achieve logarithmic regret follows from the same proof steps as Theorem 3: if  $\Delta$  is small enough,  
 1534 then the lower bound of Lai and Robbins [36] (Theorem 6 in Appendix D.1) establishes that the  
 1535 asymptotic regret of SGB cannot be better than  $(K-1) \cdot \frac{\log(T)}{2\Delta}$  if it is uniformly efficient on all  
 1536 instances. By Corollary 3, this proves the last statement of the conjecture, since some parameters  
 1537  $\eta \in [\frac{2\Delta}{K}, \eta_0]$ , which is non-empty, would violate the lower bound for  $\Delta$  small enough.

1538 Hence, to prove the conjecture it suffices to prove Eq. (20), akin to how Lemma 1 supported the proof  
 1539 of Theorem 3. More precisely, from Equation (7) and Lemma 2 we believe that it can be proved that,  
 1540 for an appropriate range of learning rates, the following holds:

$$\mathbb{E}[\theta_{1,T}] \leq \frac{K-1}{K} \cdot \frac{\log(T)}{\eta} + o(\log(T)) \quad \text{and} \quad \mathbb{E} \left[ \sum_{t=1}^T (1 - p_{1,t})^2 \right] = o(\log(T)).$$

1541 We assume the first result (logarithmic scaling) because we have a strong intuition that the post-  
 1542 convergence term corresponding to a fixed instance, with random rewards, should admit the same  
 1543 asymptotic scaling as its deterministic counterpart  $(\nu_k)_{k \in [K]} = (\delta_{\mu_k})_{k \in [K]}$ , that we studied in  
 1544 Lemma 1 in the case considered in the conjecture. We furthermore include a  $\frac{K-1}{K}$  factor to conform  
 1545 our intuition that this is a possible improvement of the upper bound of Lemma 1, as discussed in the  
 1546 main paper and Appendix D.2.

Let us now discuss the upper bound on the failure regret. By introducing  $\eta_0 > 0$ , we anticipate that (in contrast to Lemma 1), it might be necessary to restrict the learning to a bounded range to prevent large deviations for the parameters  $(\theta_{k,t})_{k \geq 2}$ . Indeed, since rewards of sub-optimal arms are random, it is possible that  $\theta_{k,t}$  becomes arbitrarily large for some  $k \geq 2$ . However, since this increase would necessarily cause  $p_{2,t}$  to be large, we would expect arm 2 to be pulled frequently, and thus  $\theta_{2,t}$  to decrease in reasonable time. In simpler terms, the instance chosen to state the conjecture makes it unlikely that the failure regret of SGB is large: arm 1 cannot deliver bad rewards, and any over-performance of sub-optimal arms will lead to fast correction, likely causing relatively small regret, probably upper bounded by a constant (thus  $o(\log(T))$ ).

1556 □

Conjecture 1 offers a direction to derive the critical threshold for  $\eta$  that is very similar to the proof of Theorem 3, in which we derived the necessary condition with scaling  $K^{-1}$ .

Then next conjecture, on the contrary, mirrors the intuition behind the proof of Theorem 2, by proposing a candidate difficult instance for SGB, for which scaling of the learning rate below the critical threshold would be necessary.

**Conjecture 2** (Candidate difficult instance). *Let  $K \geq 3$ , and  $\nu \in \mathcal{F}_\Delta^K$  be the bandit instance defined by  $\nu_1 = \text{Rad}(\Delta)$ ,  $\nu_2 = \delta_0$ , and  $\nu_3 = \dots = \nu_K = \delta_{-\mu}$  for any  $\mu \in (0, 1)$ . Then,  $\eta < \frac{2\Delta}{(K-1)(1-\Delta)}$  is necessary to guarantee logarithmic regret on such instance for any number of arms  $K$ .*

*Intuition.* As discussed in the main paper after stating Theorem 3, the specificity of SGB compared to more standard bandit policies is the fact that adding some very sub-optimal arm is not “neutral” with respect to better-performing arms, which we illustrate by understanding some scenarios that can happen with this choice of instance.

We follow the proof of Theorem 2 to provide a detailed intuition to support the conjecture. We recall that, in the proof of Theorem 2, we identified a scenario under which the regret of SGB is linear, and proved that this scenario happens with a probability that is too large to avoid polynomial regret when  $\eta > \Delta + \mathcal{O}(\Delta^2)$ . Let us consider a similar scenario.

Phase 0: unlucky start Assume that for its  $n_0$  first pulls arm 1 receives a reward  $-1$ , and that these pulls happen during a (random) number of steps  $t_0$ . By tuning  $n_0$ , we can make  $\theta_{2,t_0+1} - \theta_{1,t_0+1}$  arbitrarily large, and as a consequence,  $p_{2,t_0+1} - p_{1,t_0+1}$  can be made very close to 1. The pulls of arms  $\{3, \dots, K\}$  can only make the gap between the two parameters grow faster, since it is clear that  $p_{2,t} \geq p_{1,t}$  throughout this phase.

Phase 1: failed recovery, with a twist: We are then tempted to consider the same scenario as in the proof of Theorem 2, in which in a second phase arm 1 continues to receive rewards that are sufficiently bad to push its probability below  $1/(2T)$ . By following the same proof scheme, we could prove that the fact that the arms  $k \geq 3$  are now very sub-optimal can only make this scenario happen *faster*: indeed, if the rewards in phase 1 are sufficiently bad that the gap  $p_{2,t} - p_{1,t} \approx 1$  from the end of phase 0 can be maintained throughout phase 1, then

$$\forall t \geq t_0 + 1, \quad A_t \geq 3 \implies \theta_{2,t+1} - \theta_{1,t+1} = \theta_{2,t} - \theta_{1,t} + \eta\mu \cdot \underbrace{(p_{2,t} - p_{1,t})}_{\approx 1}.$$

Hence, the probability of arm 1 decreases not only because of its unlucky pulls, but also each time a “very bad” arm is drawn. This is a new phenomenon compared to the instance studied in the proof of Theorem 2. We believe that this is the reason why the learning rate should depend on  $\Delta/K$ , as we explain in the following. In the proof of Theorem 2, we showed that after the  $n_1$  pulls of arm 1 in phase 1 it held that

$$\theta_{1,t_0+t_1+1} \approx \theta_{1,t_0+1} - \eta\Delta n_1, \text{ and } \forall k \geq 2: \theta_{k,t_0+t_1+1} = -\frac{\theta_{1,t_0+t_1+1}}{K-1}$$

which led us to choose  $n_1 \approx \frac{K-1}{K} \cdot \frac{\log(2T)}{\eta\Delta}$ , using the linear dependency between parameters. In the new instance considered here, we believe that the following holds instead,

$$\theta_{1,t_0+t_1+1} \approx \theta_{1,t_0+1} - \eta\Delta n_1 - \eta\mu(\bar{n}_{t_0+t_1} - \bar{n}_{t_0}), \text{ with } \bar{n}_t = \sum_{s=1}^t \mathbb{1}(A_s \geq 3).$$

Hence, intuitively we can expect that a lower value of  $n_1$  (compared to the theorem) could lead to  $p_{1,t_0+t_1+1} \leq \frac{1}{2T}$  with large-enough probability.

The following detailed intuition about this phenomenon is speculative, but we think that from that point we can argue the following: since arm 1 appears “at best” as a distribution with gap  $\Delta$ , while the others appear as distributions with gap  $-\mu < 0$ , then it should hold that  $p_{1,t}/p_{k,t} \asymp \frac{\mu}{\Delta}$  throughout the duration of phase 1. We formally this in Conjecture 3 in Appendix G.3, as a new conjecture supported by experiments. As a consequence, with non-negligible probability, it should hold that  $\bar{n}_{t_0+t_1} - \bar{n}_{t_0} \approx (K-2) \cdot \frac{\Delta}{\mu} \cdot n_1$ , by summing over the sample sizes of the  $K-2$  bad deterministic arms. Under such scenario, we would then obtain that

$$\theta_{1,t_0+t_1+1} - \theta_{2,t_0+t_1+1} \approx \theta_{1,t_0+1} - \theta_{2,t_0+1} - \eta\Delta(K-1)n_1,$$

from which the desired tuning of  $n_1$  would become  $n_1 \approx \frac{\log(2T)}{(K-1)\eta\Delta}$ .

By plugging into the last steps of the proof of Theorem 2, we would obtain that a lower bound on the probability of linear regret is of order  $e^{-\frac{2\Delta}{(K-1)\eta(1-\Delta)} \log(2T)}$ , which gives a lower bound on the regret of scaling  $T^{1-\frac{2\Delta}{\eta(K-1)(1-\Delta)}}$ , polynomial if  $\eta > \frac{2\Delta}{(K-1)(1-\Delta)}$ . We believe that these arguments motivate the conjecture, although a proper formalization would involve many technicalities (akin to the proof of Theorem 2, but with more involved arguments), that we leave for future work. In particular, in order to prove the results presented in this paper we mainly had to prove upper bounds of the form  $p_{k,t} \lesssim \frac{1}{\eta\Delta_k t}$ , while for this new result it would be necessary to further prove that  $p_{k,t} \gtrsim \frac{1}{\eta\Delta_k t}$  with some reasonable probability, to use that  $\mu(\bar{n}_{t_0+t_1} - \bar{n}_{t_0}) \approx \Delta n_1$  during phase 1 is a likely scenario.  $\square$

We remark that the upper bound on the critical rate suggested by Conjecture 1 is smaller than the upper bound suggested by Conjecture 2, but the two are relatively close when  $\Delta$  is small and  $K$  is large. Proving either one of the two results presents independent challenges, and successfully proving either would constitute a significant improvement in the theoretical understanding of SGB.

## E Proof of Theorem 4

We start by restating the theorem, before detailing its proof.

**Theorem 4** (Logarithmic regret for identical gaps). *Let  $\nu \in \mathcal{F}^K$  be a MAB instance satisfying  $\Delta_2 = \dots = \Delta_K = \Delta$ , for some  $\Delta \in (0, 1)$ . Then, the regret of SGB tuned with a learning rate  $\eta$  satisfying  $\eta C_\eta < \frac{2\Delta}{K+2}$  is upper bounded as follows,*

$$\mathcal{R}_T^{\text{SGB}}(\nu) \leq \frac{2}{\eta} \cdot \mathbb{E}[\theta_{1,T+1}] + \Gamma_\nu \leq \frac{2(K-1)}{\eta} \cdot \log(T) + \Gamma_\nu, \text{ for some constant } \Gamma_\nu > 0.$$

*Proof.* Instead of using Equation (7) directly, we use Proposition 3 (Appendix F.1) to convert it into an alternative expression depending on the probabilities  $\sum_{t=1}^T \mathbb{P}(p_{1,t} < 1/2)$ , that is more adapted to the arguments presented in the rest of the proof. Combined with Lemma 2, we obtain a first regret upper bound

$$\mathcal{R}_T \leq 2(K-1) \cdot \left( \frac{\log(T)}{\eta} + 4 \right) + 2\Delta \sum_{t=1}^T \mathbb{P}\left(p_{1,t} < \frac{1}{2}\right),$$

which gives the logarithmic term of the theorem, and we can remark the constant  $\Gamma_\nu$  should be an upper bound of  $8(K-1) + \sum_{t=1}^T \mathbb{P}(p_{1,t} < 1/2)$ . It remains to prove that the tuning of  $\eta$  guarantees that the latter sum is finite. To do that, we use a proof inspired by the analysis of SAMBA [29]. Indeed, similarly to the proof of Theorem 1, we are going to prove that  $\mathbb{E}[p_t^{-1}]$  is decreasing, under a condition on  $\eta$  determined by the initial stage  $p_{1,1} = \frac{1}{K}$ . Using Lemma 17 with  $H_t = 0$ , thanks to the identical gaps, we obtain that, for all steps  $t \geq 1$ ,

$$\mathbb{E}_t \left[ \frac{1}{p_{t+1}} \right] \leq \frac{1}{p_t} - \eta(\Delta - \eta C_\eta) \frac{K}{K-1} (1-p_t)^2 + \underbrace{\frac{\eta^2 C_\eta}{2} \cdot \frac{\sum_{k=2}^K p_{k,t}^2 (1-p_{k,t}) - p_t (1-p_t)^2}{p_t}}_{W_t}. \quad (21)$$

1629 Comparing with our analysis for two-armed bandits (Th. 1), the term  $W_t$  causes additional difficulty.  
 1630 To overcome it, we simply use that  $\sum_{k=2}^K p_{k,t}^2(1 - p_{k,t}) \leq \frac{1-p_t}{4} \leq \frac{1}{4}$ , so we can simplify the  
 1631 recursion as follows,

$$\mathbb{E}_t \left[ \frac{1}{p_{t+1}} \right] \leq \frac{1}{p_t} \left( 1 + \frac{\eta^2 C_\eta}{8} \right) - \eta(\Delta - \eta C_\eta) \frac{K}{K-1} (1 - p_t)^2,$$

1632 which we can now use to complete the proof of the theorem.

1633 Step 1: reaching  $p_t = \frac{1}{2}$  in finite time. we now consider the collection of time steps  $\mathcal{T}_0$  starting in  
 1634  $t = 0$ , and ending at the stopping time  $\tau_0$  corresponding to the first time  $p_t \geq \frac{1}{2}$  holds. We use that  
 1635 within  $\mathcal{T}_0$ , when  $p_t < 1/2$ , it holds that  $\frac{K}{K-1}(1 - p_t)^2 \geq \frac{1}{4}$ . Thus, for  $t \leq \tau_0$  it holds that

$$\mathbb{E}_t \left[ \frac{1}{p_{t+1}} \right] \leq \frac{1}{p_t} \left( 1 + \frac{\eta^2 C_\eta}{8} \right) - \frac{\eta}{4} (\Delta - \eta C_\eta) = \frac{1}{p_t} + \frac{\eta}{8} \cdot \left( \eta C_\eta \left( \frac{1}{p_t} + 2 \right) - 2\Delta \right). \quad (22)$$

1636 We then use that  $p_1^{-1} = K$  to obtain that if  $\eta C_\eta < \frac{2\Delta}{K+2}$ , then it holds that  $\mathbb{E} \left[ \frac{1}{p_2} \right] < \frac{1}{p_1} - c$ , for  
 1637 the constant  $c = 2\Delta - \eta C_\eta(K+2) > 0$ . We deduce that  $\mathbb{E}[p_{t \wedge \tau_0}^{-1}] \leq p_1^{-1} - ct$ : by induction, if  
 1638  $\mathbb{E}_t[p_t^{-1}] \leq p_1^{-1} = K$  then, after taking expectations, the right hand term of the above equation is  
 1639 smaller than  $\eta C_\eta(K+2) - 2\Delta \leq -c$ , for some constant  $c > 0$ . Hence, by using similar proof steps  
 1640 as Proposition 1 of [29], we obtain that  $\mathbb{E}[t \wedge \tau_0] \leq \frac{1}{cp_1} = \frac{K}{2\Delta - \eta C_\eta(K+2)}$ .

1641 Step 2: subsequent transient phases. We now consider additional transient phases: after reaching  
 1642  $p_{\tau_0} \geq \frac{1}{2}$ , there is a probability that  $p_{\tau_0+t} < \frac{1}{2}$  happens again for some  $t > 0$ . This starts a new  
 1643 transient phase  $\mathcal{T}_1$ , starting at some step  $s_1 > \tau_0$ , with initial probability  $p_{s_1} \geq \frac{e^{-2\eta}}{2}$ , which is due to  
 1644 the step-size and the fact the previous iterate is above the threshold, i.e.,  $p_{s_1-1} > \frac{1}{2}$ . Similarly, we  
 1645 can define potential subsequent transient phases  $(\mathcal{T}_j)_{j \in \mathbb{N}}$ . For each phase, since the update formula  
 1646 (22) only depends on the probability of arm 1, we obtain with the same arguments as for  $\mathcal{T}_0$ , that

$$\forall j \geq 1, \mathbb{E}[\tau_j - s_j | s_j < +\infty] \leq \frac{2e^{2\eta}}{2\Delta - \eta C_\eta(K+2)}.$$

1647 Step 3: finite expected number of transient phases. For any learning rate  $\eta$ , there exists a  $\rho \in [0, 1)$   
 1648 that, if  $p_t \geq 1/2$  holds, then  $\inf_{s \geq 1} p_{t+s} \geq 1/2$ . In words, after the probability of the best arm  
 1649 reaches  $1/2$  there is a positive probability that it remains above  $1/2$  forever:  $\forall j \geq 1, \mathbb{P}(s_{j+1} =$   
 1650  $+\infty | \tau_j < +\infty) \geq \rho$ . By conditional independence of the phases, it is then direct to see that the  
 1651 expected number of transient phases is upper bounded by  $\rho^{-1}$ , which leads too

$$\sum_{t=1}^{+\infty} \mathbb{P} \left( p_t < \frac{1}{2} \right) \leq \frac{K}{2\Delta - \eta C_\eta(K+2)} + \frac{1}{\rho} \cdot \frac{2e^{2\eta}}{2\Delta - \eta C_\eta(K+2)},$$

1652 which is a problem-dependent constant with explicit dependency in  $K, \eta, \Delta, \rho$ . We now prove that  
 1653 the –non-explicit– constant  $\rho$  is positive.

1654 Step 4: proving that  $\rho > 0$ . We first prove the bound for the first transient stage, which we then extend  
 1655 to an arbitrary stage by the Markov property. Denote  $q_t = 1 - p_t$  and let  $q_{\tau_0}$  be the first iterate for  
 1656 which we know that  $q_{\tau_0} \leq \frac{1}{2}$ , i.e.,  $p_{\tau_0} \geq \frac{1}{2}$ . Assume there is a non-zero probability  $p' > 0$  that the  
 1657 subsequent iterate  $q_{\tau_0+1}$  is strictly bounded away from  $\frac{1}{2}$ , that is,  $q_{\tau_0+1} \geq c < \frac{1}{2}$ .

1658 We denote  $\sigma_0$  to be the first time when  $q_t \geq \frac{1}{2}$  after the time  $\tau_0$ , that is:  $\sigma_0 := \min\{t \geq \tau_0 : q_t \geq \frac{1}{2}\}$ .  
 1659 Consider  $q_{t \wedge \sigma_0}$  for  $t \geq \tau_0$ , which, by the developments in (22), is a supermartingale. As a result we  
 1660 can sufficiently upper bound  $\mathbb{E}[q_{t \wedge \sigma_0} | q_{\tau_0+1} < c]$  using the Optional Stopping Theorem as

$$\begin{aligned} c > \mathbb{E}[q_{\tau_0+1} | q_{\tau_0+1} < c] &\geq \mathbb{E}[q_{t \wedge \sigma_0} | q_{\tau_0+1} < c] \\ &= \mathbb{E}[q_{\sigma_0} \mathbb{I}[t \geq \sigma_0] | q_{\tau_0+1} < c] + \mathbb{E}[q_t \mathbb{I}[t < \sigma_0] | q_{\tau_0+1} < c] \\ &\geq \frac{1}{2} \mathbb{P}(\sigma_0 \leq t | q_{\tau_0+1} < c) + \mathbb{E}[q_t \mathbb{I}[t < \sigma_0] | q_{\tau_0+1} < c] \\ &\xrightarrow{t \rightarrow \infty} \frac{1}{2} \mathbb{P}(\sigma_0 < \infty | q_{\tau_0+1} < c), \end{aligned}$$

1661 where in the second line we split the expectation of random trajectories that hit  $\sigma_{\tau_0}$  before  $t$  and  
 1662 those that do not, in the third line we use the lower bound  $q_{\sigma_0} \geq \frac{1}{2}$ , and in the final line, we apply the  
 1663 Dominated Convergence Theorem and use that the second term remains a submartingale for all  $t$  and  
 1664 converges to 0 as  $t \rightarrow \infty$ . Therefore we have

$$\mathbb{P}(\sigma_0 = \infty | q_{\tau_0+1} < c) > 1 - 2c > 0.$$

1665 To factor out the assumption that  $q_{\tau_0+1} < c$ , we get

$$\begin{aligned} \mathbb{P}\left(\sigma_0 = \infty | q_{\tau_0+1} \leq \frac{1}{2}\right) &= (1 - p') + p' \mathbb{P}(\sigma_0 = \infty | q_{\tau_0+1} < c) \\ &\leq 1 - (1 - \delta)p' = p'(1 - 2c) := \rho > 0. \end{aligned}$$

1666 The argument can be extended to all stages using the Markov property. By the Markov property we  
 1667 have

$$\mathbb{P}(\sigma_k < \infty | \tau_{k-1} < \infty) \geq 1 - \rho > 0.$$

1668 We can decompose the events as

$$\{\sigma_{k-1} < \infty\} \cap \{\tau_{k-1} - \sigma_{k-1} < \infty\} = \{\tau_k < \infty\},$$

1669 and, since  $\mathbb{P}(\tau_k - \sigma_{k-1} < \infty | \sigma_{k-1} < \infty) = 1$  by the developments in (22) and the bound on the  
 1670 stepsize, we get

$$\mathbb{P}(\sigma_k < \infty | \sigma_{k-1} < \infty) = \mathbb{P}(\sigma_k < \infty | \tau_k < \infty) \geq 1 - \rho.$$

1671 This concludes the proof that  $\rho > 0$ , and thus that the constant  $\Gamma_\nu$  of the theorem is finite.  $\square$

1672 We then provide a result analogous to Corollary 1, showcasing that if the gap  $\Delta$  is not known a tuning  
 1673  $\eta_T = 1/\sqrt{T}$  yields theoretically sound regret guarantees.

1674 **Lemma 15** ( $\sqrt{T}$  regret with  $\eta = 1/\sqrt{T}$ ). *Assume that  $\eta = 1/\sqrt{T}$ , and that the bandit instance*  
 1675  *$\nu \in \mathcal{F}^K$  satisfies  $\Delta_2 = \dots = \Delta_K$  as in Theorem 4. Then the regret of SGB is upper bounded by*  
 1676  *$\mathcal{R}_T(\nu) \lesssim K \log(T) \sqrt{T}$  on such instance, where only absolute constants are hidden.*

1677 *Proof.* Again, if the gap  $\Delta$  is small enough so that  $\eta C_\eta \leq \frac{\Delta}{K+2}$  then we can upper bound the regret  
 1678 by  $\Delta T$ , which yields  $\mathcal{R}_T(\nu) \lesssim K \sqrt{T}$ . In the alternative case, we can use the bound of the theorem.  
 1679 The logarithmic term gives a bound scaling with  $K \log(T) \sqrt{T}$ , as desired. This could be sufficient  
 1680 if we aimed for a problem-dependent bound, by leaving the constant  $\Gamma_\nu$ . However, it is relatively  
 1681 easy to change the analysis to obtain a problem-independent bound scaling with  $\sqrt{T}$ . Indeed, we first  
 1682 observe from (21) that  $\forall t \geq 1, \mathbb{E}\left[\frac{1}{p_t}\right] \leq K \cdot \left(1 + \frac{\eta^2 e^\eta}{8}\right)^T \lesssim K$ , hence by Corollary 3 it holds that

$$\begin{aligned} \Delta \cdot \mathbb{E}\left[\sum_{t=1}^T (1 - p_t)^2\right] &\leq \Delta \cdot \frac{K-1}{\eta(\Delta - \eta C_\eta)} + \frac{\eta^2}{2} \Delta \cdot \sum_{t=1}^T \mathbb{E}\left[\frac{W_t}{p_t}\right] \\ &\leq \Delta \cdot \frac{K-1}{\eta\left(\Delta - \frac{\Delta}{K+2}\right)} + \frac{\eta^2}{2} \sum_{t=1}^T \mathbb{E}\left[\frac{1}{p_t}\right] \\ &\lesssim \frac{K}{\eta} + K \lesssim K \sqrt{T}, \end{aligned}$$

1683 which finalizes the proof.  $\square$

## 1684 F Additional technical results and proofs

1685 In this section we present the detailed computations of the tools presented in Section 3, for the regret  
 1686 analysis of SGB when there are more than two arms, with additional discussions presenting some  
 1687 intuitions that we did not include in the main paper for space reasons.

## 1688 F.1 Alternative regret bound from Equation (7)

1689 In this appendix we present an alternative regret bound that can be derived from Equation (7), and  
1690 that we use in the proof of Theorem 4.

1691 **Proposition 3** (Generic regret upper bound for SGB). *For **any** learning rate  $\eta > 0$  and for any*  
1692  *$\varepsilon \in (0, 1)$ , defining  $C_\varepsilon = \frac{\max_{k \in [K]} \Delta_k}{(1-\varepsilon)\Delta}$ , SGB satisfies the following regret bound,*

$$\forall \nu \in \mathcal{F}^K, \quad \mathcal{R}_T^{\text{SGB}} \leq C_\varepsilon \cdot \left( \frac{\mathbb{E}[\theta_{1,T}]}{\eta} + \Delta \cdot \sum_{t=1}^T \mathbb{P}(p_{1,t} < 1 - \varepsilon) \right).$$

1693 *Proof.* We start from (7), and consider bounding the *failure regret* in the right-hand term. For any  
1694  $\varepsilon \in (0, 1)$ , it holds that

$$\begin{aligned} \mathbb{E} \left[ \sum_{t=1}^T (1 - p_{1,t})^2 \right] &\leq \mathbb{E} \left[ \sum_{t=1}^T (1 - p_{1,t})^2 \mathbb{1}(p_{1,t} < 1 - \varepsilon) \right] + \mathbb{E} \left[ \sum_{t=1}^T (1 - p_{1,t})^2 \mathbb{1}(p_{1,t} \geq 1 - \varepsilon) \right] \\ &\leq \mathbb{E} \left[ \sum_{t=1}^T \mathbb{1}(p_{1,t} < 1 - \varepsilon) \right] + \varepsilon \cdot \mathbb{E} \left[ \sum_{t=1}^T (1 - p_{1,t}) \mathbb{1}(p_{1,t} \geq 1 - \varepsilon) \right] \\ &\leq \sum_{t=1}^T \mathbb{P}(p_{1,t} < 1 - \varepsilon) + \varepsilon \cdot \mathbb{E} \left[ \sum_{t=1}^T (1 - p_{1,t}) \right], \end{aligned}$$

1695 By recognizing the regret in the last term and putting it together in (7) we get a recursive relation

$$\forall \nu \in \mathcal{F}^K, \quad \mathcal{R}_T^{\text{SGB}} \leq \bar{\mathcal{R}}_T := \frac{\Delta_{\max}}{\eta \Delta} \mathbb{E}[\theta_{1,T}] + \Delta_{\max} \cdot \sum_{t=1}^T \mathbb{P}(p_{1,t} < 1 - \varepsilon) + \varepsilon \cdot \bar{\mathcal{R}}_T,$$

1696 which by reorganizing the terms provides

$$\mathcal{R}_T^{\text{SGB}} \leq \bar{\mathcal{R}}_T \leq \frac{\Delta_{\max}}{(1-\varepsilon)\eta \Delta} \cdot \mathbb{E}[\theta_{1,T}] + \frac{\Delta_{\max}}{1-\varepsilon} \cdot \sum_{t=1}^T \mathbb{P}(p_{1,t} < 1 - \varepsilon).$$

1697 The proof is completed by factorizing  $C_\varepsilon$  out of both terms.  $\square$

1698 **Additional insights from Proposition 3** We recall that, with the same notations, Equation (7)  
1699 provides

$$\forall \nu \in \mathcal{F}^K, \quad \mathcal{R}_T^{\text{SGB}}(\nu) \leq C_0 \cdot \left( \frac{\mathbb{E}[\theta_{1,T}]}{\eta} + \Delta \cdot \mathbb{E} \left[ \sum_{t=1}^T (1 - p_{1,t})^2 \right] \right),$$

1700 with both regret bounds valid for any value of  $\eta > 0$ , and  $\varepsilon \in (0, 1)$  in Proposition 3. Hence, proving  
1701 logarithmic regret for SGB under a specific choice of  $\eta$  can be equivalently done by either proving  
1702 that  $\mathbb{E} \left[ \sum_{t=1}^T (1 - p_{1,t})^2 \right] = o(\log(T))$ , as we did in the proof of Theorem 1, or that

$$\mathbb{E}[T_\varepsilon^\eta] = o(\log(T)), \quad \text{for } T_\varepsilon^\eta := \{t \in [T] : p_{1,t} \leq 1 - \varepsilon\}.$$

1703 In words,  $\mathbb{E}[T_\varepsilon^\eta]$  is simply the expected number of time steps for which the probability of the best  
1704 arm is below the threshold  $1 - \varepsilon$ , within a trajectory of duration  $T$ .

1705 Then, we believe that the following result is interesting to interpret the regret of SGB in the polynomial  
1706 regime. We use the notation  $A \asymp B$  to express that both  $A \lesssim B$  and  $B \lesssim A$  hold.

1707 **Corollary 4.** *Assume that  $\mathcal{R}_T^{\text{SGB}} = \Omega(T^\alpha)$  for some instance  $\nu \in \mathcal{F}^K$  and some  $\alpha > 0$ . Then, it*  
1708 *holds that*

$$\mathcal{R}_T^{\text{SGB}} \asymp \mathbb{E}[T_\varepsilon^\eta] \asymp \mathbb{E} \left[ \sum_{t=1}^T (1 - p_{1,t})^2 \right].$$

1709 *Proof.* From Lemma 2, we know that  $\mathbb{E}[\theta_{1,T}]$  is always logarithmic, and can thus be ignored when  
 1710 comparing the bounds when the regret is polynomial. Then, the fact that the regret is upper bounded  
 1711 by each term comes from Proposition 3 and Eq. (7). It remains to show that the converse holds. We  
 1712 first directly obtain that

$$\mathcal{R}_T^{\text{SGB}} \geq \Delta \mathbb{E} \left[ \sum_{t=1}^T (1 - p_{1,t}) \right] \geq \Delta \mathbb{E} \left[ \sum_{t=1}^T (1 - p_{1,t})^2 \right],$$

1713 and then that

$$\mathcal{R}_T^{\text{SGB}}(\nu) \geq \Delta \mathbb{E} \left[ \sum_{t=1}^T (1 - p_{1,t}) \right] \geq \Delta \varepsilon \mathbb{E} \left[ \sum_{t=1}^T \mathbb{1}(p_{1,t} \leq 1 - \varepsilon) \right],$$

1714 which gives the result since the regret thus admits the same scaling in  $T$  as both quantities.  $\square$

1715 We interpret this result as follows: when the regret of SGB is not logarithmic, then it scales with the  
 1716 number of times  $1 - p_{1,t}$  is smaller than any fixed threshold. This gives a way to interpret the term  
 1717  $\mathbb{E} \left[ \sum_{t=1}^T (1 - p_{1,t})^2 \right]$  as the *failure regret* introduced in the main paper.

1718 **Non-unique optimal arm** We now show that Proposition 3 and Lemma 2 can be adapted when  
 1719 several arms are optimal, however we kept the assumption that one arm is optimal throughout the  
 1720 paper to simplify the presentation.

1721 If the optimal arm is not unique, we can recover an expression similar to (7) by grouping the  $K^*$   
 1722 optimal arms together. Indeed, defining  $\theta_{\star,t} = \sum_{j=1}^K \theta_{j,t} \mathbb{1}(\Delta_j = 0)$  and  $p_{\star,t} = \sum_{j=1}^K p_{j,t} \mathbb{1}(\Delta_j =$   
 1723  $0)$  we have that

$$\mathcal{R}_T \leq \overline{\mathcal{R}}_T := \max_{k \in [K]} \Delta_k \cdot \mathbb{E} \left[ \sum_{t=1}^T (1 - p_{\star,t}) \right],$$

1724 and also that

$$\begin{aligned} \mathbb{E}[\delta \theta_{\star,t}] &= \eta \sum_{j=1}^{K^*} p_{j,t} \sum_{k=1}^K p_{k,t} \Delta_{j,k} \\ &\geq \sum_{j=1}^{K^*} p_{j,t} (1 - p_{\star,t}) \Delta \\ &= p_{\star,t} (1 - p_{\star,t}) \Delta, \end{aligned}$$

1725 so we can adapt Equation (7) by replacing  $\theta_{1,t}$  by  $\theta_{\star,t}$  and  $p_{1,t}$  by  $p_{\star,t}$ . Then, for the proof of  
 1726 Lemma 2 we only need to consider the event  $\mathbb{E}[\max_{k > K^*} \theta_{k,t}]$ , and remark that under this event and  
 1727  $\theta_{\star,t} \geq \gamma_t$  it holds that

$$\begin{aligned} 1 - p_{\star,t} &\leq \frac{(K - K^*)}{\sum_{j=1}^{K^*} e^{\theta_{j,t}} + (K - K^*)} \leq \frac{(K - K^*)}{\sum_{j=1}^{K^*} e^{\theta_{j,t}}} \\ &\leq \frac{K - K^*}{K^*} \cdot e^{-\frac{\theta_{\star,t}}{K^*}} \leq \frac{K - K^*}{K^*} \cdot e^{-\frac{\gamma_T}{K^*}}, \end{aligned}$$

1728 so we can adapt the result of Lemma 2 by replacing  $\gamma_T = \log(1 + (K - 1)\eta T)$  by  $\gamma_T =$   
 1729  $K^* \log \left( 1 + 2\eta \frac{K - K^*}{K^*} T \right)$ .

1730 **Remark 2.** It is actually quite intuitive that the number of optimal arms appear in the regret bound,  
 1731 since their respective parameters will increase slower by splitting the pulls among them. We believe  
 1732 that our lower bound  $\sum_{j=1}^{K^*} e^{\theta_{j,t}} \geq K^* e^{\frac{\theta_{\star,t}}{K^*}}$ , that generates this multiplicative factor, is tight in most  
 1733 plausible scenario if  $T$  is large enough. For instance, if the optimal arms share the same distribution  
 1734 we might the parameters of all optimal arms to be relatively close to each other.

## 1735 F.2 Proof of Lemma 2 and additional discussions

1736 We restate and prove the lemma.

1737 **Lemma 2.** *For any horizon  $T \geq 1$  and for any learning rate  $\eta$ , parameter  $\theta_{1,T+1}$  of SGB satisfies*

$$\mathbb{E}[\theta_{1,T+1}] \leq \log \left( 1 + \left( \eta\Delta + \frac{\eta^2}{2} e^\eta \right) (K-1) \cdot M_T \cdot T \right) \wedge (K-1) \cdot (\log(T) + 4\eta) ,$$

1738 *Proof.* We propose two independent proofs for the two components of the upper bound.

1739 **First bound:** we derive this first bound, depending on  $M = \sup_{k \in [K]} \sup_{t \geq 1} \mathbb{E}[e^{\theta_{k,t}}]$ , from Jensen  
1740 inequality. The proof follows the same steps as the proof of Theorem 1. For any  $\lambda > 0$ , we obtain  
1741 that

$$\mathbb{E}[\theta_T] = \frac{1}{\lambda} \mathbb{E}[\log(e^{\lambda\theta_T})] \leq \frac{1}{\lambda} \log(\mathbb{E}[e^{\lambda\theta_T}]) ,$$

1742 We now study  $\mathbb{E}[e^{\lambda\theta_T}]$ , using that  $e^{\lambda\theta_{t+1}} = e^{\lambda\theta_t + \lambda\delta\theta_t}$ . As in the proof of Theorem 1, we use  
1743 approximations of the exponential to get a recursion formula. More precisely, here we use that for  
1744 any  $q > 0$  and bounded reward  $r$  of expectation  $\mu$  it holds that

$$\mathbb{E}[e^{qr}] = 1 + q\mu + \sum_{n=2}^{+\infty} \frac{q^n}{n!} \mathbb{E}[r^n] \leq 1 + q\mu + q^2 \cdot \sum_{n=2}^{+\infty} \frac{q^{n-2}}{n!} \leq 1 + q\mu + \frac{q^2}{2} \cdot e^q ,$$

1745 that we apply in the following computations with notation  $a_t = \lambda\eta(1-p_t)$  and  $b_t = \lambda\eta p_t$ ,

$$\begin{aligned} \mathbb{E}_t[e^{\lambda\theta_{t+1}}] &= e^{\lambda\theta_t} \cdot \mathbb{E}_t[e^{\lambda\delta\theta_t}] \leq e^{\lambda\theta_t} \cdot (p_t \mathbb{E}_t[e^{a_t r_t} | A_t = 1] + (1-p_t) \mathbb{E}[e^{-b_t r_t} | A_t \neq 1]) \\ &\leq e^{\lambda\theta_t} \cdot \left( 1 + p_t \cdot (a_t \mu_1 + a_t^2 \cdot e^{a_t/2}) + (1-p_t) \cdot \left( -b_t \max_{k \geq 2} \mu_k + b_t^2 \cdot e^{b_t/2} \right) \right) \\ &\leq e^{\lambda\theta_t} \cdot (1 + p_t(1-p_t) \cdot (\lambda\eta\Delta + (\lambda\eta)^2 e^{\lambda\eta/2})) , \end{aligned}$$

1746 where in the last line we replaced  $a_t, b_t$  by their values and used that  $\lambda\eta(p_t \vee 1-p_t) \leq \lambda\eta$ . We can  
1747 further write that

$$e^{\lambda\theta_t} p_t(1-p_t) = \frac{e^{(1+\lambda)\theta_t} \cdot \sum_{k=2}^K e^{\theta_{k,t}}}{(e^{\theta_t} + \sum_{k=2}^K e^{\theta_{k,t}})^2} = p_t^2 \cdot e^{(\lambda-1)\theta_{1,t}} \cdot \sum_{k=2}^K e^{\theta_{k,t}} .$$

1748 For  $K = 2$ , choosing  $\lambda = 2$  was convenient because it made this expression exactly equal to  $p_t^2$ .  
1749 In general, we unfortunately cannot make this simplification. For that reason, we choose  $\lambda = 1$  to  
1750 eliminate the term depending on  $\theta_{1,t}$ . Hence, we just obtain that

$$\begin{aligned} \mathbb{E}[e^{\theta_{1,T}}] &\leq 1 + \left( \eta\Delta + \frac{\eta^2}{2} e^\eta \right) \cdot \sum_{t=1}^{T-1} \mathbb{E} \left[ \sum_{k=2}^K e^{\theta_{k,t}} \right] \\ &\leq 1 + \left( \eta\Delta + \frac{\eta^2}{2} e^\eta \right) \cdot \sup_{k \geq 2} \sup_{t \geq 1} \mathbb{E}[e^{\theta_{k,t}}] \cdot (K-1) \cdot T , \end{aligned}$$

1751 which leads to the first part of the result of the lemma.

1752 **Second bound:** the main intuition of the proof is that, when  $\theta_{1,T}$  becomes large, it must be at  
1753 the expense of another parameter, that must be very small. We formalize this with the following  
1754 intermediate result.

1755 **Lemma 16.** *For any time horizon  $T \geq 1$ , it holds that*

$$\mathbb{E} \left[ \min_{k \in [K]} \theta_{k,T} \right] \geq -\log(T) - 4\eta .$$

1756 Before proving this result, we show that it immediately leads to the second bound of Lemma 2: by  
 1757 Equation (9) it holds that  $\theta_{1,T} = -\sum_{k=2}^K \theta_{k,T} \leq -(K-1) \min_{k \in [K]} \theta_{k,T}$ , so

$$\mathbb{E}[\theta_{1,T}] \leq (K-1) \cdot (\log(T) + 4\eta).$$

1758 We now prove Lemma 16. Fix  $\gamma_T := \log(T) + \eta$ , and consider  $\theta_t^- := -\min_{k \in [K]} \theta_{k,t} \geq 0$ . Then,

$$\begin{aligned} \mathbb{E}[\theta_T^-] &\leq \mathbb{E}[\theta_T^- \mathbb{1}(\theta_T^- \leq \gamma_T)] + \mathbb{E}[\theta_T^- \mathbb{1}(\theta_T^- > \gamma_T)] \\ &\leq \gamma_T \mathbb{P}(\theta_T^- \leq \gamma_T) + \mathbb{E}[\theta_T^- \mathbb{1}(\theta_T^- > \gamma_T)] \end{aligned}$$

1759 We now use the following fact: if  $\theta_T^- \geq \gamma_T$ , then there exists a time step  $u \leq T$  such that

$$\forall s \in \{u, \dots, T\} : \theta_s^- \geq \gamma_T \text{ and } \theta_{u-1}^- < \gamma_T$$

1760 Using that  $\theta_u^- \in [\gamma_T, \gamma_T + \eta]$ , we obtain that

$$\begin{aligned} \mathbb{E}[\theta_T^-] &\leq \gamma_T \mathbb{P}(\theta_T^- \leq \gamma_T) + \mathbb{E}[\theta_u^- \mathbb{1}(\theta_T^- \geq \gamma_T)] + \mathbb{E}[(\theta_T^- - \theta_u^-) \mathbb{1}(\theta_T^- \geq \gamma_T)] \\ &\leq \gamma_T \mathbb{P}(\theta_T^- \leq \gamma_T) + \mathbb{E}[(\gamma_T + \eta) \mathbb{1}(\theta_T^- \geq \gamma_T)] + \mathbb{E}[(\theta_T^- - \theta_u^-) \mathbb{1}(\theta_T^- \geq \gamma_T)] \\ &\leq \gamma_T + \eta + \mathbb{E}[(\theta_T^- - \theta_u^-) \mathbb{1}(\theta_T^- \geq \gamma_T)] \\ &\leq \gamma_T + \eta + \mathbb{E}\left[\left(\sum_{s=u}^{T-1} \delta\theta_s^-\right) \mathbb{1}(\forall s \geq u : \theta_s^- \geq \gamma_T)\right]. \end{aligned}$$

1761 From this step, we carefully handle the randomness of  $u$  and its dependence with the event  $E_u =$   
 1762  $\{\forall s \geq u : \theta_s^- \geq \gamma_T\}$  in the remaining expectation as follows,

$$\begin{aligned} \mathbb{E}\left[\left(\sum_{s=u}^{T-1} \delta\theta_s^-\right) \mathbb{1}(E_u)\right] &\leq \mathbb{E}\left[\left(\sum_{s=u}^{T-1} (\delta\theta_s^-)_+\right) \mathbb{1}(E_u)\right] \\ &\leq \mathbb{E}\left[\sum_{s=u}^{T-1} (\delta\theta_s^-)_+ \mathbb{1}(\theta_{s+1}^- \geq \gamma_T)\right] \\ &\leq \mathbb{E}\left[\sum_{s=1}^{T-1} (\delta\theta_s^-)_+ \mathbb{1}(\theta_{s+1}^- \geq \gamma_T)\right] \\ &\leq \mathbb{E}\left[\sum_{s=1}^{T-1} \mathbb{E}_s[(\delta\theta_s^-)_+] \mathbb{1}(\theta_{s+1}^- \geq \gamma_T)\right]. \end{aligned}$$

1763 Then, for any round  $s \in [T]$ , let  $m_s = \operatorname{argmin}_{k \in [K]} \theta_{k,t}$  denote the index of the arm corresponding  
 1764 to the minimum parameter. Then, it either holds that  $m_s = m_{s+1}$ , and so  $\delta\theta_s^- = -\delta\theta_{m_{s+1},s}$ , or  
 1765 that  $m_s \neq m_{s+1}$ , in which case  $\theta_{m_s,s} \leq \theta_{m_{s+1},s}$  so  $\delta\theta_s^- \leq -\delta\theta_{m_{s+1},s}$ . Hence, in both cases we  
 1766 have that  $(\delta\theta_s^-)_+ \leq |\delta\theta_{m_{s+1},s+1}|$ . To conclude, it remains to remark that, by definition of  $m_{s+1}$  and  
 1767 the fact that  $\theta_{s+1}^- \geq \gamma_T$ , it must hold that  $\theta_{m_{s+1},s} \leq -\gamma_T + \eta$ , so  $p_{m_{s+1},s} \leq e^{\theta_{m_{s+1},s}} \leq e^{-\gamma_T + \eta}$ .  
 1768 Hence, we can finally obtain that

$$\begin{aligned} \mathbb{E}\left[\left(\sum_{s=u}^{T-1} \delta\theta_s^-\right) \mathbb{1}(E_u)\right] &\leq \eta \mathbb{E}\left[\sum_{s=0}^{T-1} 2p_{m_{s+1},s} (1 - p_{m_{s+1},s}) \mathbb{1}(\theta_{m_{s+1},s+1} \geq \gamma_T)\right] \\ &\leq 2\eta T e^{-\gamma_T + \eta} \leq 2\eta. \end{aligned}$$

1769

□

### 1770 F.3 Regret upper bound for two arms with time-varying rate

1771 We develop in this section the counterpart of Corollary 1 with a time-varying rate  $\eta_t = \sqrt{\frac{\log(t)}{t}}$ .

1772 **Proposition 4.** *When  $\Delta$  is unknown, the time-varying learning rate  $\eta_t = \sqrt{\frac{\log(e \vee t)}{t}}$  yields a regret*  
 1773 *bound  $\mathcal{R}_T \lesssim \log(T)^{3/2} \sqrt{T}$  for any two-armed bandit  $\nu \in \mathcal{F}^2$ , where the hidden constants are*  
 1774 *absolute.*

1775 *Proof.* The first part of the analysis consists in adapting Eq. (7) with time varying learning rates. We  
 1776 remark that the sequence  $(\eta_t)_{t \geq 1}$  is non-increasing, hence we can write that

$$\mathbb{E}[\theta_T] = \mathbb{E} \left[ \sum_{t=1}^T \eta_t \cdot p_t(1 - p_t) \right] \Delta \geq \Delta \eta_T \cdot \mathbb{E} \left[ \sum_{t=1}^T p_t(1 - p_t) \right],$$

1777 so we can reuse Eq. (7) by replacing  $\eta$  by  $\eta_T$  in the first term, which first yields

$$\mathcal{R}_T \leq \frac{\mathbb{E}[\theta_T]}{\eta_T} + \Delta \cdot \mathbb{E} \left[ \sum_{t=1}^T (1 - p_t)^2 \right].$$

1778 Then, by following the same steps as the proof of Theorem 1, we obtain that

$$\forall t \geq 1, \mathbb{E}_t[e^{2\theta_{t+1}}] \leq e^{2\theta_t} + p_t^2 \cdot 2(\eta_t \Delta + \eta_t^2 C_{\eta_t}) \implies \mathbb{E}[e^{2\theta_T}] \leq 1 + 2 \sum_{t=1}^{T-1} (\eta_t \Delta + \eta_t^2 C_{\eta_t}) \lesssim T,$$

1779 since the sequence  $(\eta_t)_{t \geq 1}$  can be upper bounded by constants. We further note that a more precise  
 1780 (e.g.  $\sqrt{T}$ ) bound would not change the result because it is used inside a logarithm. We now consider  
 1781 the failure regret term. We first remark that, since the learning rate converges to 0, there exists a  
 1782 deterministic time  $t_0$  satisfying  $\sup_{t \geq t_0} \eta_t C_{\eta_t} \leq \frac{\Delta}{2}$ . More precisely, it holds that  $t_0 \lesssim \frac{\log(\Delta^{-1})}{\Delta^2}$ . The  
 1783 last part of the proof consists in using the proof steps of Theorem 1 for  $t \geq t_0$ , and obtain that

$$\Delta \cdot \mathbb{E} \left[ \sum_{t=1}^T (1 - p_t)^2 \right] \leq \Delta t_0 + \frac{\Delta \cdot \mathbb{E}[x_{t_0}]}{2\eta_T(\Delta - \sup_{t \geq t_0} \eta_t C_{\eta_t})} \lesssim \frac{\log(\Delta^{-1})}{\Delta} + \frac{\mathbb{E}[x_{t_0}]}{\eta_T}.$$

1784 It remains to upper bound  $\mathbb{E}[x_{t_0}]$ . We recall from the proof of the theorem that the following relation  
 1785 holds, for **any** learning rate ,

$$\forall t \geq 1 : \mathbb{E}_t[x_{t+1}] \leq x_t - 2\eta_t(1 - p_t)^2 \cdot (\Delta - \eta_t C_{\eta_t}),$$

1786 which holds for any arbitrary sequence of learning rate since the proof considers each time step  
 1787 separately. Hence, even in the worst case where  $\eta_t$  is much larger than  $\Delta$ , we can use that

$$\mathbb{E}_t[x_{t+1}] - x_t \lesssim \eta_t^2, \quad \text{so} \quad \mathbb{E}[x_{t_0}] \lesssim \sum_{t=1}^{t_0} \eta_t^2 \leq \log(t_0) \cdot \sum_{t=1}^{t_0} \frac{1}{t_0} \lesssim \log(t_0)^2.$$

1788 We then deduce from the fact that  $\mathbb{E}_t[x_{t+1}] - x_t \lesssim \eta_t^2$  that  $\mathbb{E}[x_{t+1}] \lesssim \log(t_0)$ , which finally gives a  
 1789 regret bound of order

$$\begin{aligned} \mathcal{R}_T &\lesssim \left( \frac{\log(T)}{\eta_T} + \frac{\log(\Delta^{-1})}{\Delta} + \frac{\log(\Delta^{-1})^2}{\eta_T} \right) \wedge \Delta T \\ &\lesssim \sqrt{T \log(T)} + \log(T)^{3/2} \sqrt{T} + \frac{\log(\Delta^{-1})}{\Delta} \wedge \Delta T, \end{aligned}$$

1790 and yields the result by remarking that the gap-dependent term cannot itself be larger than  $\sqrt{T \log(T)}$ ,  
 1791 so the dominant term of the bound is  $\log(T)^{3/2} \sqrt{T}$ , that comes from the term involving  $\mathbb{E}[x_{t_0}]$  in the  
 1792 regret decomposition.  $\square$

1793 **Remark 3** (Improved logarithms for  $\eta_t = 1/\sqrt{t}$ ). We remark that the above regret bound can be  
 1794 slightly optimized by considering  $\eta_t = 1/\sqrt{t}$ , that gives

$$\frac{\log(T)}{\eta_T} + \frac{\sum_{t=1}^{t_0} \eta_t^2}{\eta_T} \lesssim \log(T) \cdot \sqrt{T},$$

1795 which becomes the scaling of the upper bound. However, we chose to study more precisely  $\eta_t =$   
 1796  $\sqrt{\frac{\log(t \vee e)}{t}}$  in this section and Appendix G.1 because it directly compares to the optimal horizon-  
 1797 dependent rate of Corollary 1.

1798 **F.4 Proof of Lemma 3**

1799 The proof of Lemma 3 is a direct consequence of the following technical result, after using the same  
 1800 telescopic arguments as in the proof of Theorem 1, and that  $\sum_{k=2}^K p_{k,t}^2 \geq \frac{(1-p_{1,t})^2}{K-1}$ .

1801 **Lemma 17.** Define  $C_\eta$  as in Theorem 1. Then, for any  $\nu \in \mathcal{F}^K$  and  $t \geq 1$ , it holds that

$$\mathbb{E}_t \left[ \frac{1}{p_{1,t+1}} \right] \leq \frac{1}{p_{1,t}} - \eta G_t \cdot (\Delta - \eta C_\eta) + \frac{\eta H_t + \frac{\eta^2}{2} W_t}{p_{1,t}},$$

$$\text{with } \begin{cases} G_t = (1 - p_t)^2 + \sum_{k=2}^K p_{k,t}^2 \\ H_t = \sum_{k=2}^K p_{k,t}^2 (\mathbb{E}_t[\Delta_{A_t}] - (1 - p_t) \Delta_k) \\ W_t = \sum_{k=2}^K p_{k,t}^2 (1 - p_{k,t}) - p_t (1 - p_t)^2 \end{cases}.$$

1802 In addition,  $H_t = 0$  if  $\Delta_2 = \dots = \Delta_K = \Delta$ , and  $W_t = 0$  if  $K = 2$ .

1803 *Proof.* We define  $x_t = \frac{1}{p_{1,t}}$ , and use (13) to obtain the following recursion,

$$x_{t+1} = x_t \cdot \sum_{k=1}^K p_{k,t} \cdot e^{\eta \delta \theta_{k,t} - \eta \delta \theta_{1,t}}.$$

1804 By definition of  $C_\eta$ , for  $\eta < 1$  it holds that  $e^x \leq 1 + x + C_\eta \cdot \frac{x^2}{2}$ . By linearity of the expectation, we  
 1805 deduce that

$$\mathbb{E}_t[x_{t+1}] \leq x_t \cdot \left( 1 + \eta \sum_{k=1}^K p_{k,t} \cdot \mathbb{E}_t[\delta \theta_{k,t} - \delta \theta_{1,t}] + \frac{\eta^2 C_\eta}{2} \sum_{k=1}^K p_{k,t} \cdot \mathbb{E}_t[(\delta \theta_{k,t} - \delta \theta_{1,t})^2] \right).$$

1806 We investigate the first-order term of the approximation. Using (5), and that  $\delta \theta_{1,t} = -\sum_{k=2}^K \delta \theta_{k,t}$ ,  
 1807 (Eq. (9)) we obtain that

$$\sum_{k=2}^K p_{k,t} \cdot \mathbb{E}_t[\delta \theta_{k,t} - \delta \theta_{1,t}] = -\sum_{k=2}^K (1 - p_{1,t} + p_{k,t}) \cdot p_{k,t} \cdot \sum_{j \neq k} p_{j,t} (\Delta_k - \Delta_j) := -E_t. \quad (23)$$

1808 We now further analyze the newly defined term  $E_t$ , that we express as a function of  $\mathbb{E}_t[\Delta_{A_t}] =$   
 1809  $\sum_{j=1}^K p_j \Delta_j$ . We can naturally decompose  $E_t$  into a positive and a negative term. First,

$$\sum_{k=2}^K (1 - p_{1,t} + p_{k,t}) \cdot p_{k,t} \cdot \sum_{j=1}^K p_{j,t} \Delta_j = \left( (1 - p_{1,t})^2 + \sum_{k=2}^K p_{k,t}^2 \right) \mathbb{E}_t[\Delta_{A_t}] = G_t \cdot \mathbb{E}_t[\Delta_{A_t}],$$

1810 with  $G_t$  as defined in the statement of the lemma. We then obtain that

$$\begin{aligned} \sum_{k=2}^K (1 - p_{1,t} + p_{k,t}) \cdot p_{k,t} \cdot \sum_{j=1}^K p_{j,t} \Delta_k &= \sum_{k=2}^K (1 - p_{1,t} + p_{k,t}) \cdot p_{k,t} \cdot \Delta_k \\ &= (1 - p_{1,t}) \mathbb{E}_t[\Delta_{A_t}] + \sum_{k=2}^K p_{k,t}^2 \Delta_k. \end{aligned}$$

1811 So, by subtracting the two we obtain that

$$E_t = (1 - p_{1,t}) \cdot p_{1,t} \cdot \mathbb{E}_t[\Delta_{A_t}] + \sum_{k=2}^K p_{k,t}^2 (\Delta_k - \mathbb{E}_t[\Delta_{A_t}]) \quad (24)$$

$$= (1 - p_{1,t}) \cdot p_{1,t} \cdot \mathbb{E}_t[\Delta_{A_t}] + p_{1,t} \cdot \sum_{k=2}^K p_{k,t}^2 \Delta_k + \underbrace{\sum_{k=2}^K p_{k,t}^2 ((1 - p_{1,t}) \Delta_k - \mathbb{E}_t[\Delta_{A_t}])}_{-H_t} \quad (25)$$

$$\geq p_{1,t} \cdot \Delta \cdot \underbrace{\left( (1 - p_{1,t})^2 + \sum_{k=2}^K p_{k,t}^2 \right)}_{G_t} - H_t. \quad (26)$$

1812 This writing allows to obtain that  $H_t = 0$  if the gaps are identical, because in that case it holds that  
 1813  $\mathbb{E}_t[\Delta_{A_t}] = (1 - p_{1,t})\Delta$ .

1814 Let us now consider the term

$$V_t := \sum_{k=1}^K p_{k,t} \cdot \mathbb{E}[(\delta\theta_{k,t} - \delta\theta_{1,t})^2] .$$

1815 To analyze the value of the term inside the expectation, it suffices to consider three cases:

$$(\delta\theta_{k,t} - \delta\theta_{1,t})^2 = \begin{cases} (1 - p_{k,t} + p_{1,t})^2 \mathbb{E}[r_t^2 | A_t = k] & \text{if } A_t = k , \\ (1 - p_{1,t} + p_{k,t})^2 \mathbb{E}[r_t^2 | A_t = 1] & \text{if } A_t = 1 , \\ (p_{1,t} - p_{k,t})^2 \mathbb{E}[r_t^2 | A_t \neq 1, k] & \text{otherwise.} \end{cases}$$

1816

$$\begin{aligned} \forall k \in \{2, \dots, K\} : \quad \mathbb{E}[(\delta\theta_{k,t} - \delta\theta_{1,t})^2] &\leq p_{k,t} \cdot (1 - p_{k,t} + p_{1,t})^2 + p_{1,t} \cdot (1 - p_{1,t} + p_{k,t})^2 \\ &\quad + (1 - p_{1,t} - p_{k,t}) \cdot (p_{1,t} - p_{k,t})^2 . \end{aligned}$$

1817 Note that this expression is exact for Rademacher distributions, for which  $r_t^2 = 1$  always holds. Let  
 1818 us use the notation  $z = p_{1,t} - p_{k,t}$  to simplify some terms, and again drop the  $t$  subscript to simplify  
 1819 the notation. Replacing the terms, we get

$$\begin{aligned} \mathbb{E}[(\delta\theta_k - \delta\theta_1)^2] &= p_k \cdot (1 + z)^2 + p_1 \cdot (1 - z)^2 + (1 - p_1 - p_k) \cdot z^2 \\ &= p_k \cdot (1 + 2z + z^2) + p_1 \cdot (1 - 2z + z^2) + z^2 - (p_1 + p_k) \cdot z^2 \\ &= p_k \cdot (1 + 2z) + p_1 \cdot (1 - 2z) + z^2 \\ &= p_k + p_1 - 2z^2 + z^2 \\ &= p_k + p_1 - z^2 . \end{aligned}$$

1820 From this step we can continue by plugging back the value of  $z$ , and finally obtain that

$$\sum_{k=2}^K p_k \cdot \mathbb{E}[(\delta\theta_k - \delta\theta_1)^2] \leq \sum_{k=2}^K p_k \cdot (p_k + p_1 - (p_1 - p_k)^2) \quad (27)$$

$$= \sum_{k=2}^K p_k \cdot (p_k(1 - p_k) + p_1(1 - p_1) + 2p_1p_k) \quad (28)$$

$$= \sum_{k=2}^K p_k^2(1 - p_k) + p_1 \cdot (1 - p_1)^2 + 2p_1 \sum_{k=2}^K p_k^2 \quad (29)$$

$$= 2p_1 \cdot \left( (1 - p_1)^2 + \sum_{k=2}^K p_k^2 \right) + \underbrace{\sum_{k=2}^K p_k^2(1 - p_k) - p_1 \cdot (1 - p_1)^2}_W , \quad (30)$$

1821 where in the last line we made appear a term that can be expressed similarly to  $E_t$  in the above  
 1822 computations. Finally, we get,

$$V_t \leq 2\eta^2 p_{1,t} \cdot \left( (1 - p_{1,t})^2 + \sum_{k=2}^K p_{k,t}^2 \right) + \eta^2 W_t = 2\eta^2 p_{1,t} G_t + \eta^2 W_t ,$$

1823 with  $W_t = \sum_{k=2}^K p_{k,t}^2(1 - p_{k,t}) - p_{1,t} \cdot (1 - p_{1,t})^2$ . This concludes the proof, since it is immediate  
 1824 that  $W_t = 0$  for  $K = 2$ .  $\square$

#### 1825 **F.4.1 Properties of the components of Lemma 17**

1826 In this section, we investigate structural properties of the terms  $H_t$  and  $W_t$ , which appear in Lemma 17  
 1827 in the setting  $K > 2$ . These terms complicate the analysis of the failure regret compared to the  
 1828 simpler case  $K = 2$ . We believe that understanding their behavior is a crucial step toward extending  
 1829 the theoretical analysis of SGB to multi-armed settings.

1830 In particular, we show that  $H_t$  and  $W_t$  may exhibit non-trivial behavior even when  $K = 3$ , suggesting  
 1831 that bounding them uniformly can be challenging. Nevertheless, we also identify several natural  
 1832 scenarios where these terms are either small or negative, which may help control their contribution in  
 1833 a refined analysis.

1834 Property 1:  $H_t$  can be non-negative

1835 Consider a setting with  $K = 3$  arms where  $\Delta_3 > \Delta_2$ . Then, for any round  $t$ , dropping the subscript  
 1836 in the sampling probabilities for notational simplicity, we obtain:

$$\begin{aligned} H_t &= p_2^2(p_2\Delta_2 + p_3\Delta_3 - (p_2 + p_3)\Delta_2) + p_3^2(p_2\Delta_2 + p_3\Delta_3 - (p_2 + p_3)\Delta_3) \\ &= p_2^2p_3(\Delta_3 - \Delta_2) + p_3^2p_2(\Delta_2 - \Delta_3) \\ &= p_2p_3(\Delta_3 - \Delta_2)(p_2 - p_3), \end{aligned}$$

1837 which is non-negative if and only if  $p_2 \geq p_3$ .

1838 In the regret bound of Lemma 3, the above result converts into a term

$$S_T^H := \sum_{t=1}^T \mathbb{E}[H'_t] := \sum_{t=1}^T \mathbb{E} \left[ \frac{p_{2,t}p_{3,t}}{p_{1,t}} (p_{2,t} - p_{3,t}) \right] \cdot (\Delta_3 - \Delta_2).$$

1839 There are several intuitive reasons to believe that this term can be controlled under reasonable tuning  
 1840 of the learning rate. First, we interpret the fact that  $p_{2,t} \leq p_{3,t}$  yields  $H'_t < 0$  as follows: if the  
 1841 current state of SGB is “very wrong”, in the sense that arm 3 (the worst arm) is currently treated as  
 1842 the best arm by the policy, some self-correction will occur, i.e. this state is unstable. This effect is  
 1843 even amplified if  $p_{1,t}$  is very small. Moreover, for the case where  $p_{2,t} > p_{3,t}$ , then  $H'_t$  is positive but  
 1844 scales with  $p_{2,t}^2 \cdot p_{3,t} / p_{1,t}$ . Even in scenarios for which  $p_{2,t} \approx 1$  we might nonetheless expect  $p_{3,t}$  to  
 1845 have decreased “faster” than  $p_{1,t}$ , especially if  $\Delta_3 - \Delta_2$  is significant. In any case, a scenario where  
 1846 both  $p_{2,t}$  and  $p_{3,t}$  are significantly larger than  $p_{1,t}$  appears quite unlikely, and we thus believe that  
 1847  $H'_t$  should be (at least) bounded with high probability. This is also supported by the observation that  
 1848  $H_t = 0$  at initialization (where  $p_2 = p_3 = 1/3$ ).

1849 Property 2: Generalization for  $K$  arms

1850 For  $K$  arms, assuming  $\Delta_2 \leq \dots \leq \Delta_K$ , we obtain:

$$\begin{aligned} H_t &= \sum_{k=2}^K p_k^2 \left( \sum_{j=2}^K p_j (\Delta_j - \Delta_k) \right) \\ &= \sum_{k=2}^K p_k^2 \left( \sum_{j>k} p_j (\Delta_j - \Delta_k) - \sum_{j=2}^k p_j (\Delta_k - \Delta_j) \right) \\ &= \sum_{k=2}^K p_k^2 \sum_{j>k} p_j (\Delta_j - \Delta_k) - \sum_{j=2}^K \sum_{k>j} p_k^2 p_j (\Delta_k - \Delta_j) \\ &= \sum_{k=2}^K p_k^2 \sum_{j>k} p_j (\Delta_j - \Delta_k) - \sum_{k=2}^K \sum_{j>k} p_j^2 p_k (\Delta_j - \Delta_k) \\ &= \sum_{k=2}^K \sum_{j>k} (\Delta_j - \Delta_k) p_k p_j (p_k - p_j), \end{aligned}$$

1851 which we believe might be useful for future analysis of SGB starting from Lemma 3.

1852 Property 3:  $W_t$  can be non-negative

1853 We again drop the subscript  $t$  for the probabilities, and consider  $W_t = \sum_{k=2}^K p_k^2 (1 - p_k) - p_1 (1 - p_1)^2$ .  
 1854 Let us consider again  $K = 3$ , and use the notation  $\widetilde{W}_t = \sum_{k=2}^K p_k^2 (1 - p_k)$ . Then, using that

1855  $p_3 = 1 - p_1 - p_2$  we re-write  $\widetilde{W}_t$  as follows,

$$\begin{aligned}
\widetilde{W}_t &= p_2^2(1 - p_2) + p_3^2(1 - p_3) = p_2^2(1 - p_2) + (1 - p_1 - p_2)^2(p_1 + p_2) \\
&= p_1(1 - p_1)^2 + p_2^2(1 - p_2) + p_2(1 - p_1)^2 - 2p_2p_1(1 - p_1) - 2p_2^2(1 - p_1) + p_2^2p_1 + p_2^3 \\
&= p_1(1 - p_1)^2 + p_2^2 + p_2(1 - p_1)(1 - 3p_1) - 2p_2^2 + 3p_2^2p_1 \\
&= p_1(1 - p_1)^2 - p_2^2(1 - 3p_1) + p_2(1 - p_1)(1 - 3p_1) \\
&= p_1(1 - p_1)^2 + p_2(1 - 3p_1)(1 - p_2 - p_1) .
\end{aligned}$$

1856 Hence, we obtain the simple property

$$K = 3 \implies W_t = p_{2,t}p_{3,t}(1 - 3p_{1,t}), \quad \text{so} \quad W_t \geq 0 \Leftrightarrow p_{1,t} \leq 1/3.$$

1857 Furthermore, it is easy to see that for  $p_1 < \frac{1}{3}$ , the maximum of  $W_t$  is achieved when  $p_2 = p_3 = \frac{1-p_1}{2}$ ,  
1858 and so:

$$W_t \leq (1 - p_{1,t})^2 \cdot \frac{1 - 3p_{1,t}}{4} .$$

1859 Note that this allocation is always feasible for  $K > 3$ , which provides at least a lower bound on the  
1860 maximum possible value of  $W_t$  in general.

1861 Property 4:  $p_{1,t} \geq \frac{1}{3} \implies W_t \leq 0$

1862 We proved this property for  $K = 3$ , in fact showing that the relation is an equivalence in that case, and  
1863 now extend it for  $K > 3$ . Let us assume that  $p_{1,t} \geq \frac{1}{3}$ . Then, under the constraint  $\sum_{k=2}^K p_k = 1 - p_1$ ,  
1864 the function  $p_k^2(1 - p_k)$  is increasing over all admissible values of  $p_k$ . By symmetry, we deduce that  
1865 the maximizer of  $W$  should be achieved when  $m$  of the suboptimal probabilities are equal to  $\frac{1-p_1}{m}$   
1866 and the remaining ones are zero, for some  $m \in [K - 1]$ . For a fixed  $m$ , this yields:

$$W = \frac{(1 - p_1)^2}{m^2} \left( 1 - \frac{1 - p_1}{m} \right) - p_1(1 - p_1)^2 .$$

1867 If  $m$  were continuous, the maximizer would be  $m = \frac{3}{2}(1 - p_1)$ . Since  $m$  must be discrete, it is either  
1868  $m = 0$  or  $m = 1$ . Both cases yield  $W = 0$ .

1869 This property shows that once SGB correctly identifies arm 1 as the best arm and assigns it a sufficiently  
1870 large probability, the term  $W_t$  ceases to be problematic and no longer contributes adversely to the  
1871 dynamics of Lemma 17.

1872 Property 5:  $W_t = 0$  if the sampling probabilities are uniform

1873 We conclude this section by showing that  $p_{1,t} \geq \frac{1}{3}$  is sufficient but not necessary for  $W_t$  to be small.  
1874 In particular, the uniform probability vector  $p = (\frac{1}{K}, \dots, \frac{1}{K})$  also yields

$$W_t = (K - 1)p_1^2(1 - p_1) - p_1(1 - p_1)^2 = p_1(1 - p_1)(Kp_1 - 1) = 0 .$$

1875 This indicates that  $W_t = 0$  at the uniform initialization, and thus should remain small in the very first  
1876 steps of the algorithm. This observation supports the idea that the early-phase behavior of SGB is  
1877 not negatively impacted by  $W_t$ . In fact, we even conjecture that, under properly small tuning of the  
1878 learning rate  $\eta$ , it might be possible to prove that  $\mathbb{E} \left[ \frac{W_t}{p_{1,t}} \right] \leq 0$  for all steps  $t \geq 1$ .

## 1879 G Supplementary experiments

1880 In this section, we present additional experiments that support the theoretical findings of the paper  
1881 and complement the empirical results from Section 4. We provide the code in the supplementary  
1882 material accompanying the paper for reproducibility<sup>2</sup>.

1883 For simplicity, all experiments use Rademacher distributions unless stated otherwise. These distri-  
1884 butions are particularly well-suited for our purposes, as they maximize variance for a given mean

<sup>2</sup>will be turned into a Github link after publication.

under the constraint that rewards lie in  $[-1, 1]$ . Intuitively, they represent the most “challenging” case within this setting.

Before presenting our results, we clarify a key terminological choice: throughout the paper, the term regret refers to the quantity defined *in expectation*, as in Eq. (1). In this section, we report empirical estimates of this quantity based on multiple runs of the algorithm. Given  $M$  independent runs under a given policy, the *empirical regret* is computed as

$$\widehat{\mathcal{R}}_T^M = \frac{1}{M} \sum_{m=1}^M R_T^m := \frac{1}{M} \sum_{m=1}^M \sum_{k=2}^K \Delta_k N_k^m(T), \quad (31)$$

where  $N_k^m(T)$  denotes the number of pulls of arm  $k \in [K]$  up to horizon  $T$  for the  $m$ -th run of the policy.

For any  $M \in \mathbb{N}$ , it directly follows that  $\mathcal{R}_T = \mathbb{E} [\widehat{\mathcal{R}}_T^M]$ . In this section, as well as in Section 4 in the main paper, the term regret (or *average regret*) refers to this empirical estimate unless otherwise stated. Finally, references to the “regret” of specific trajectories refer to the values of  $(R_T^m)_{m \in \mathcal{M}}$  for a subset of runs indexed by  $\mathcal{M}$ , while references to the *distribution of regret* pertain to the empirical distribution of the values  $(R_T^m)_{m \in [M]}$ .

### G.1 Time-varying learning rate

We start by illustrating the results presented in Corollary 1 and Appendix F.3, establishing the theoretical guarantees of SGB with time-dependent learning rate. In each setup, we run SGB tuned with:

- the oracle gap-dependent tuning  $\eta = \frac{2\Delta}{K}$ ,
- a horizon-dependent gap-free tuning  $\eta = \sqrt{\frac{K \log(T)}{T}}$ , which requires to know  $T$  in advance,
- an anytime tuning  $\eta = \rho \wedge \sqrt{\frac{K \log(t)}{t}}$ , for some clipping parameter  $\rho$  that we discuss.

We consider horizon  $T = 10^4$ , for which it holds that  $\sqrt{\frac{\log(T)}{T}} = 0.03$ .

**Two-armed bandits** We evaluate two configurations, both featuring a sub-optimal arm with mean 0. In the first setup, we set  $\Delta = 0.05$  to explore a regime where the initial anytime learning rate significantly exceeds the oracle tuning. In contrast, the second setup uses  $\Delta = 0.5$  to examine the opposite scenario, where the learning rate decays quickly relative to the gap. This allows us to highlight the algorithm’s sensitivity to the relationship between the decaying learning rate and the problem difficulty.

The results, presented in Figure 3, lead to two key observations. First, the horizon-dependent tuning yields sublinear regret in both setups, supporting the theoretical guarantee of Corollary 1. Second, the experiment with  $\Delta = 0.05$  highlights the critical role of the clipping parameter  $\rho$  in stabilizing performance under the anytime rate: while the average regret under  $\eta_t = 0.5 \wedge \sqrt{\log(t)/t}$  is sublinear, a significant fraction of trajectories suffer nearly linear regret. This effect is substantially mitigated by setting  $\rho = 0.1$  instead of  $\rho = 0.5$ . Interestingly, this improvement arises despite the fact that  $\eta_t$  drops below 0.1 naturally (without clipping) after approximately 650 steps, suggesting that early iterations with an overly aggressive learning rate can severely compromise the algorithm’s trajectory.

This observation echoes findings from prior work on the sensitivity of SGB to initialization [14, 15]. In particular, as suggested by Theorem 2, if SGB is run with a poor learning rate up to time  $t_0$ , then with non-negligible probability it can reach a state where  $p_{1,t_0} \lesssim t_0^{-1}$ , making recovery exceedingly slow.

**$K$ -armed bandits** The insights presented for two-armed bandits extend to our third experiment with  $K = 5$  and  $\Delta = 0.25$ , where the use of a time-varying learning rate again leads to high variance in regret across trajectories, an effect that only tighter clipping can avoid. In this setting, it takes approximately 4000 steps for the un-clipped learning rate to fall below the oracle tuning.

Overall, these experiments emphasize that phases of substantial **over-estimation** of the learning rate should be avoided at all costs to ensure reliable performance. If no information about  $\Delta$  is available, tuning the learning rate using the final horizon  $T$  appears more robust, and the case where  $T$  is unknown can be handled using a standard doubling trick. More generally, any use of excessively large learning rates, even briefly, can result in high variance across runs. Nonetheless, these experimental findings remain consistent with the theoretical results established in this paper, as the regret (in the sense of Eq. (1)) is defined *in expectation*, and the sublinear guarantees for time-varying learning rates apply in that sense.

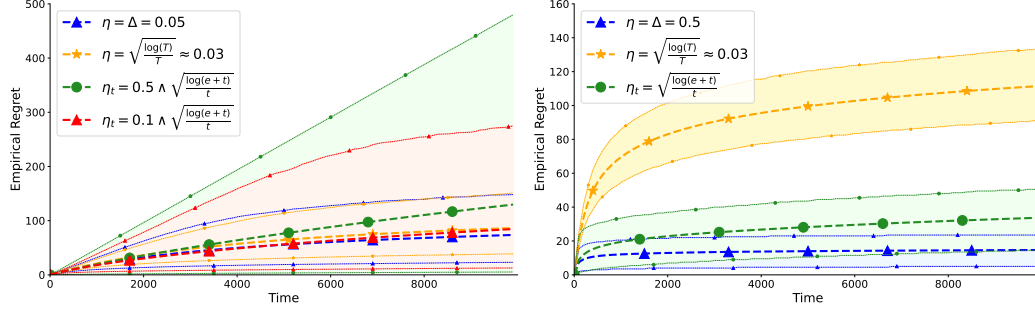

Figure 3: Average regret and 10 – 90% percentiles up to horizon  $T = 10^4$ ,  $N = 5 \cdot 10^3$  trajectories on a bandit problem with means  $\mu_1 = 0.05$ ,  $\mu_2 = 0$  (Left),  $\mu_1 = 0.5$ ,  $\mu_2 = 0$  (Right).

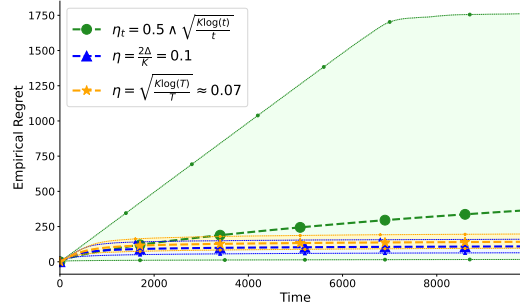

Figure 4: Average regret and 10 – 90% percentiles up to horizon  $T = 10^4$ ,  $N = 5 \cdot 10^3$  trajectories on the bandit with means  $\mu_1 = 0.25$ ,  $\mu_2 = \dots = \mu_5 = 0$ .

## G.2 Comparison with standard bandit policies

We now benchmark the performance of SGB against several standard bandit policies. Motivated by the literature review in Appendix A.3, we include a range of algorithms that exemplify different frameworks for balancing exploration and exploitation:

- UCB, in its standard implementation [18, Figure 1].
- Thompson Sampling (TS), using a Beta prior/posterior setup [19, 42], and a uniform prior.
- MED, implemented with the Bernoulli KL-divergence [45, 49].
- SAMBA, as defined by Walton and Denisov [29]. While less standard, we include it as an alternative application of the policy gradient principle to bandits.

Since each of these policies is designed for Bernoulli rewards, we rescale the Rademacher rewards to binary format before passing them to the algorithm: each reward  $r$  is transformed to  $r' = 0.5 \cdot (r + 1)$ . We emphasize that this transformation is **not** applied to SGB, which directly receives the original Rademacher rewards,  $r \in \{-1, 1\}$ .

Among the selected baselines, both MED and TS are known to be asymptotically optimal in the considered settings, in the sense that their regret upper bounds match the Lai & Robbins lower bound [36]. For optimism-based algorithms, we chose UCB over KL-UCB. While KL-UCB offers better

asymptotic guarantees, on par with TS and MED, it requires solving an optimization problem at every time step which significantly increases its runtime. Given the scale of our experimental evaluation, spanning many settings and runs, this choice is primarily motivated by practical considerations. Additionally, benchmarking SGB against other algorithms (like UCB) that are not explicitly tailored to the KL-divergence structure of the environment offers a complementary perspective on its empirical performance.

**Parameters tuning** To ensure a fair comparison between SGB and SAMBA, we followed a consistent rule for setting their respective learning rates. The experiments presented in Section 4 of the main paper indicate that, for both policies, the most effective strategy seems to consist in using the *critical learning rate predicted by theory* for each specific setup. For SGB, this leads us to choose  $\eta = \frac{2\Delta}{K}$ , which we conjecture to be the critical threshold for  $K \geq 2$  (see Appendix D.3). For SAMBA, we set  $\alpha = \frac{\Delta}{2}$ . As discussed in Appendix B.2, Walton and Denisov [29] prove logarithmic regret for Bernoulli rewards when  $\alpha = \frac{\Delta}{\mu_1 - \Delta} = \frac{\Delta}{\max_{k \geq 2} \mu_k}$ . The factor  $\frac{1}{2}$  in our tuning arises from the rescaling of rewards from the interval  $[-1, 1]$  to  $[0, 1]$ , and we deliberately ignore the denominator to avoid introducing further assumptions on the mean values of the arms.

**Experiments** We consider four experimental setups designed to illustrate the comparative performance of SGB across a range of scenarios:

- In Figure 5 (Left), we consider a setting with  $K = 5$  arms, all with means close to 0, and where each sub-optimal arm has the same gap  $\Delta = 0.1$ .
- In Figure 5 (Right), we consider a setting with  $K = 10$  arms. The minimum gap is 0.2, while the other sub-optimal arms have significantly larger gaps: 0.5 for two arms and 1 for five arms.
- In Figure 6 (Left), we consider  $K = 5$  arms with very low rewards, with  $\mu_1 = -0.8$ .
- In Figure 6 (Right), we consider  $K = 4$  arms with high rewards, with  $\mu_1 = 0.96$ , and the worst arm having mean 0.9.

The first setup illustrates that, when the problem is fully aligned with the oracle information used by SGB (i.e.,  $\Delta$  is known and exactly matches the gap of **all** sub-optimal arms), the performance of SGB closely matches that of state-of-the-art policies such as Thompson Sampling. Although TS achieves this without oracle knowledge, the experiment shows that, for well-specified problems, SGB can be highly competitive with proper tuning.

In contrast, the second setup highlights a limitation: when the sub-optimality gaps vary significantly, SGB becomes sub-optimal compared to optimized policies like MED and TS, which implement separate exploration mechanism for each arm. While it still performs reasonably well (e.g., better than UCB), the fixed learning rate results in over-exploration of significantly sub-optimal arms.

Finally, the last two experiments in Figure 6 demonstrate that although SGB outperforms UCB in scenarios with extreme means (close to the boundaries of the  $[-1, 1]$  support), it cannot compete with approaches like MED and TS, which leverage KL-divergences or tailored posterior distributions to better adapt to the geometry of the problem.

In all setups, SGB compares favorably to SAMBA in terms of both average regret and the 10–90% empirical regret range. We believe the parameter tuning of both methods is fair with respect to their theoretical guarantees and the level of oracle information used. A more detailed comparison with SAMBA is provided in Appendix G.4.

### G.3 Asymptotic tightness of Theorem 1

We propose a set of experiments designed to verify the tightness of the  $\log(T)$  factor in the regret upper bound of Theorem 1 for  $K = 2$ , and to support the conjecture that the bound of Lemma 2 for general  $K$  might be tightened by a factor  $\frac{K-1}{K}$ .

**Two-armed bandits** For the case  $K = 2$ , we consider a problem with means  $\mu_1 = 0$  and  $\mu_2 = -0.25$ , so that  $\Delta = 0.25$ . We perform 1000 independent runs of SGB over a horizon  $T = 10^5$ , for three fixed learning rates:  $\eta \in \{0.05, 0.1, 0.2\}$ . Each choice of  $\eta$  lies within the range of validity

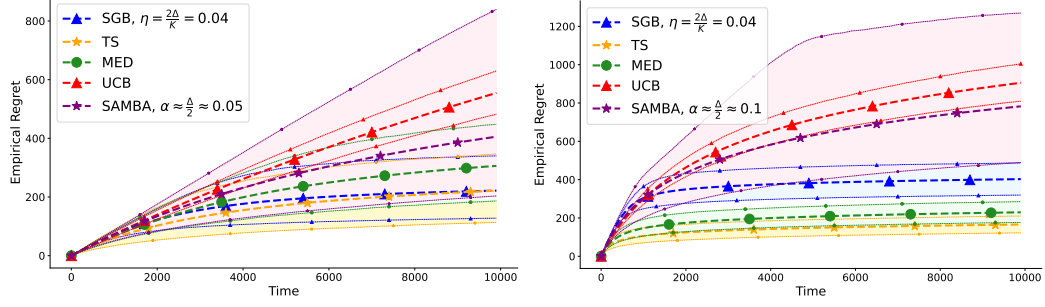

Figure 5: Average regret and 10 – 90% percentiles up to horizon  $T = 10^4$ ,  $N = 5 \cdot 10^3$  trajectories on the bandit problems with averages  $\mu_1 = 0.1, \mu_2 = \dots = \mu_5 = 0$  (Left), and  $\mu_1 = 0.5, \mu_2 = 0.3, \mu_3 = \dots = \mu_8 = 0$ , and  $\mu_9 = \mu_{10} = -0.5$  (Right).

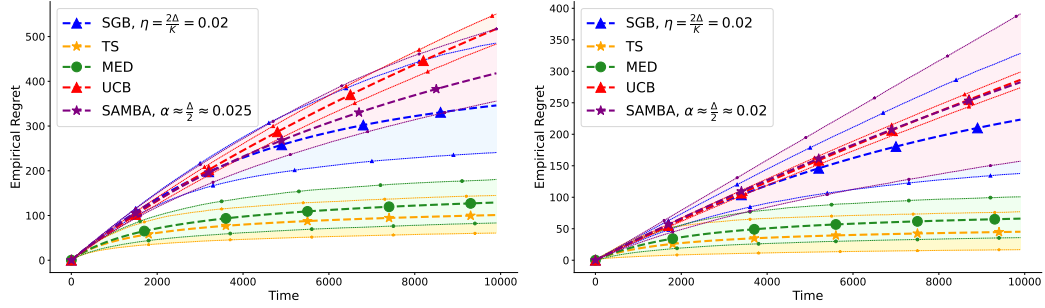

Figure 6: Average regret and 10 – 90% percentiles up to horizon  $T = 10^4$ ,  $N = 5 \cdot 10^3$  trajectories on the bandit problems with averages  $\mu_1 = -0.8, \mu_2 = -0.85, \mu_3 = \mu_4 = -0.9, \mu_5 = -0.95$  (Left), and  $\mu_1 = 0.96, \mu_2 = \mu_3 = 0.92, \mu_4 = 0.9$  (Right).

of Theorem 1. In Figure 7, we plot the empirical regret (computed as  $t \mapsto \hat{\mathcal{R}}_t^M$ , see Eq. (31) with  $M = 10^3$ ) in logarithmic scale, along with the theoretical curves  $t \mapsto \frac{\log(t)}{2\eta}$  corresponding to each learning rate.

To facilitate the comparison of the asymptotic slopes, we represent the  $x$ -axis in logarithmic scale, and each theoretical curve is vertically shifted to match the empirical regret at time  $T$ . That is, we plot

$$t \in [T] \mapsto \frac{\log(t)}{2\eta} + \hat{\mathcal{R}}_T^M - \frac{\log(T)}{2\eta}.$$

The figure confirms the tightness of the bound in Theorem 1 for this particular setup: for all three values of  $\eta$ , the empirical regret closely follows the theoretical prediction as  $T$  increases, thus supporting the sharpness of the logarithmic term in the regret bound.

**$K$ -armed bandits.** We now consider two experimental setups with  $K > 2$ . In the first, with  $K = 4$  arms, we set  $\mu_1 = 0$  and choose sub-optimal arms with mean  $-0.4$ , so that all arms share the same sub-optimality gap. In the second setup, with  $K = 5$ , we choose  $\mu_1 = 0.9, \mu_2 = 0.65$ , and  $\mu_3 = \mu_4 = \mu_5 = -1$ , so that the minimal gap is  $\Delta = 0.25$ , while some arms have significantly larger gaps.

The results, reported in Figure 8, show that in both cases the regret appears to scale asymptotically as  $\frac{K-1}{K} \cdot \frac{\log(T)}{\eta}$ . While this behavior can be expected in the first setup, where all sub-optimal arms are symmetric, the second case is more surprising. We refer to discussions in Appendix D.2 for additional insights. Based on these observations, we formulate the following conjecture.

**Conjecture 3.** For any bandit problem  $\nu \in \mathcal{F}^K$ , in the post-convergence regime, *all* sub-optimal arms  $k \in [K]$  are explored at a rate  $\frac{1}{K} \cdot \frac{1}{\eta \Delta_k t}$ , and thus contribute equally to the overall (asymptotic) regret, each by a term  $\frac{1}{\eta K} \log(T)$ .

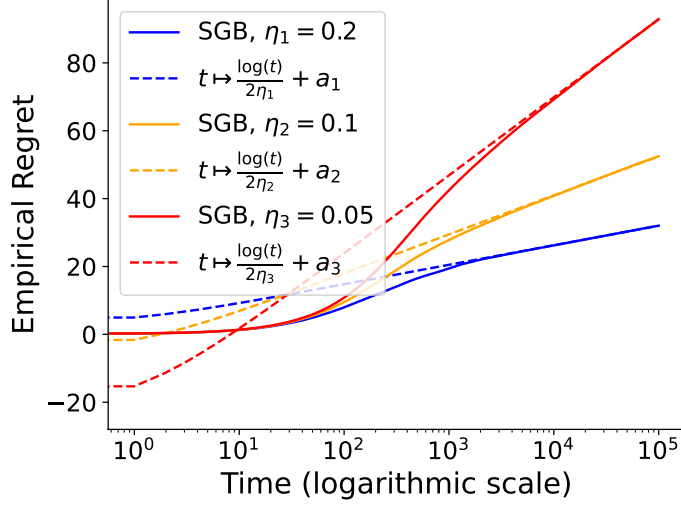

Figure 7: Empirical regret of SGB in logarithmic scale up to horizon  $T = 10^5$ , averaged over  $N = 10^3$  independent trajectories on the two-armed bandit problem with means  $\mu_1 = 0$  and  $\mu_2 = -0.25$ . Results for three learning rates  $(\eta_i)_{i \in [3]} \in \{0.05, 0.1, 0.2\}$ , where the offsets  $(a_i)_{i \in [3]}$  are chosen so that each comparator curve matches the empirical regret at time  $T$ .

2022 Note that this conjecture is stronger than the conjectures formulated in Appendix D.3: Conjecture 1  
 2023 could be proved as a consequence of Conjecture 3, while the latter would considerably help in  
 2024 proving Conjecture 2, as discussed in Appendix D.3. Additionally, we can emphasize that in such  
 2025 Rademacher/bounded settings, optimized policies like TS and MED typically satisfy an asymptotic  
 2026 exploration rate of  $\frac{1}{2\Delta_k^2 t}$  (up to some KL-divergence approximation), which matches the above rate if  
 2027  $\eta = \frac{2\Delta_k}{K}$ . This is coherent with the result of the first experiment presented in Section G.2.

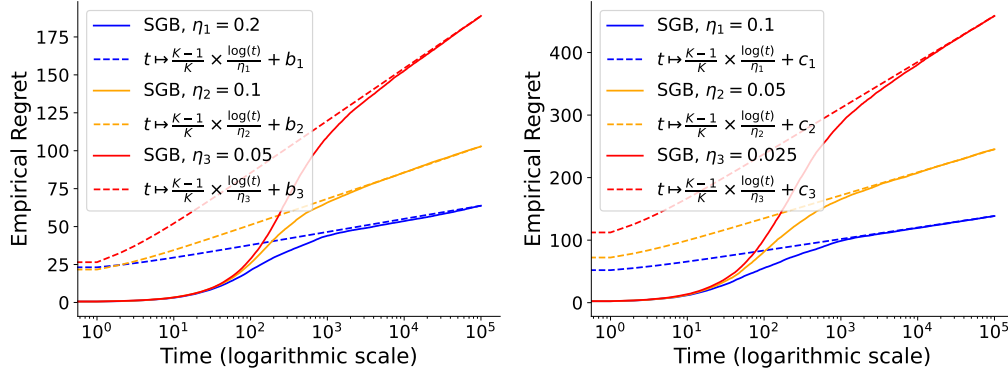

Figure 8: Empirical regret of SGB in logarithmic scale up to horizon  $T = 10^5$ , averaged over  $N = 10^3$  independent trajectories on the bandit problems defined by  $\mu_1 = 0$  and  $\mu_2 = \mu_3 = \mu_4 = -0.4$  (Left) and  $\mu_1 = 0.9, \mu_2 = 0.65$  and  $\mu_3 = \mu_4 = \mu_5 = -1$  (Right). Results for three learning rates  $(\eta_i)_{i \in [3]} \in \{\frac{\Delta}{2K}, \frac{\Delta}{K}, \frac{2\Delta}{K}\}$ , where the offsets  $(b_i)_{i \in [3]}$  and  $(c_i)_{i \in [3]}$  are chosen so that each comparator curve matches the empirical regret at time  $T$ .

2028 To further test the conjecture, we considered two additional setups, for which the results are reported  
 2029 in Figure 9. We considered instances with  $K = 9$  and  $K = 12$  respectively, with arms with various  
 2030 gaps. More precisely, the instances considered in the two experiments are parametrized by the  
 2031 following averages,

$$\begin{aligned} \mu_{\text{xp},1} &= \{0.5, 0.2, 0.2, 0, 0, 0, -0.2, -0.2, -0.2\}, \quad \text{and} \\ \mu_{\text{xp},2} &= \{0, -0.4, -0.4, -0.4, -0.5, -0.5, -0.5, -0.6, -0.6, -0.8, -0.8, -0.8\}. \end{aligned}$$

2032 We still observe the same asymptotic scaling as in previous experiments, which hints that the  
 2033 conjecture holds.

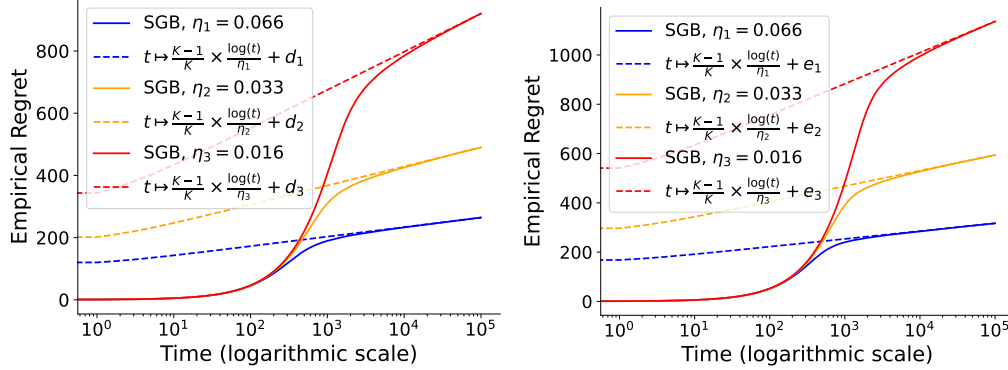

Figure 9: Empirical regret of SGB in logarithmic scale up to horizon  $T = 10^5$ , averaged over  $N = 10^4$  independent trajectories on the bandit problems defined by averages  $\mu_{\text{xp},1}$  (Left) and averages  $\mu_{\text{xp},2}$  (Right). Results for three learning rates  $(\eta_i)_{i \in [3]} \in \{\frac{\Delta}{2K}, \frac{\Delta}{K}, \frac{2\Delta}{K}\}$ , where the offsets  $(d_i)_{i \in [3]}$  and  $(e_i)_{i \in [3]}$  are chosen so that each comparator curve matches the empirical regret at time  $T$ .

2033

#### 2034 G.4 Detailed comparison with SAMBA

2035 We now isolate SAMBA and SGB, and propose experiments with the double objective of highlighting  
 2036 the differences between the two approaches, and of illustrating the discussion of Section 2 regarding  
 2037 the tuning of the learning rate in PG methods under additional moment conditions. We mainly focus  
 2038 on settings with  $K = 2$ , since the experiments presented in Appendix G.2 already show that SGB and  
 2039 SAMBA are not directly comparable for  $K > 2$  in various scenarios.

2040 In contrast with previous sections, where we considered Rademacher rewards, all problems in this  
 2041 subsection involve **Bernoulli rewards**. This model choice allows us to discuss the performance of  
 2042 SAMBA directly in the setting under which it was originally studied in [29]. Contrarily to Rademacher  
 2043 rewards, this setting further allows us to design problems that exhibit interesting moment conditions,  
 2044 for instance by specifying low average rewards, as typically encountered in online advertising [34].

2045 First, we compare SAMBA and SGB in configurations where their parameter tuning (denoted respectively  
 2046 by  $\alpha$  and  $\eta$ ) yields the same asymptotic regret bound. Indeed, while Theorem 1 gives a regret bound  
 2047 scaling as  $\frac{\log(T)}{2\eta}$  for SGB, Theorem 1 of [29] gives a bound of  $\frac{\log(T)}{\alpha}$  for SAMBA. Hence, in Figure 10,  
 2048 we present results for two experiments where we choose tunings  $\alpha = \Delta$  and  $\eta = \frac{\Delta}{2}$ . While in both  
 2049 cases the asymptotic (logarithmic) scaling of the two policies appears to match—illustrated by parallel  
 2050 average regret curves in logarithmic scale—their pre-convergence behaviors differ significantly. Our  
 2051 results suggest that for these “equivalent” asymptotic tuning, SAMBA outperforms SGB in the settings  
 2052 considered.

2053 However, while the parameter  $\alpha$  is already maximized under no additional assumptions on  
 2054  $\max_{k \geq 2} \mu_k$ , the learning rate  $\eta$  of SGB could be increased further, up to  $\Delta$ . This illustrates that  
 2055 even if SAMBA and SGB share comparable post-convergence dynamics under appropriate choices of  
 2056 learning rates, as discussed from a theoretical perspective in Appendix B.2, their pre-convergence  
 2057 behaviors differ considerably. As such, the two policies may have distinct merits and limitations.  
 2058 In the figure, we retain TS from the benchmark policies introduced in Section G.2 to illustrate the  
 2059 performance of a state-of-the-art bandit policy on this problem.

2060 Then, we illustrate how additional moment assumptions can allow SAMBA and SGB to perform well  
 2061 with learning rates larger than  $\Delta$ . We consider two problems with Bernoulli rewards with small  
 2062 average values. In a first experiment, with  $K = 2$  arms, we use the same learning rate for both  
 2063 algorithms,  $\eta = \alpha = \frac{\Delta}{\mu_1}$ ; in a second experiment with  $K = 10$  arms and averages  $\mu_1 = 0.05$   
 2064 and  $\mu_2 = \dots = \mu_{10} = 0.03$ , for which we still choose  $\alpha = \frac{\Delta}{\mu_1}$  but adopt  $\eta = \frac{2\Delta}{K\mu_1}$  in order to  
 2065 align with our analysis. We recall that the theoretical guarantees of SAMBA for this tuning of  $\alpha$  hold

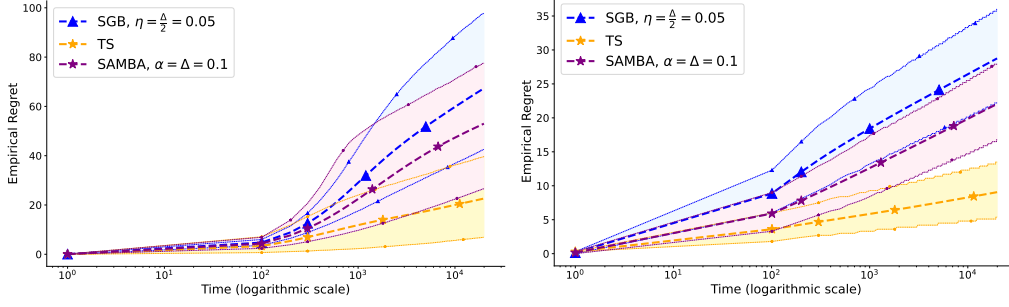

Figure 10: Empirical regret in logarithmic scale up to horizon  $T = 2 \cdot 10^4$ , averaged over  $N = 10^4$  trajectories on the bandit problems defined by  $\mu_1 = 0.6$  and  $\mu_2 = 0.5$  (Left) and  $\mu_1 = 0.4$ ,  $\mu_2 = 0.1$  (Right). In both cases, SGB is tuned with  $\eta = \frac{\Delta}{2}$  while SAMBA uses  $\alpha = \Delta$ .

for any number of arms  $K$ , thanks to a careful design of the policy that updates the leading arm differently from the others. We refer to Appendix B.2 for details. The results, presented in Figure 11, show that the additional oracle knowledge allows the PG algorithms to achieve a performance that can be comparable to Thompson Sampling. Notably, in the first experiment the regret statistics of SGB (average regret, 10–90% quantiles) closely match those of TS; and in the second experiment the average regret of both PG policies remain competitive, although SAMBA suffers larger variance across trajectories than TS. Nevertheless, we can further remark that in both cases the variance across trajectories is considerably smaller for SGB compared to SAMBA. Although the results do not suggest that PG methods should be preferred over TS—even under the additional assumptions we introduced—the fact that their performance is comparable to a policy that is optimized for the considered family of distributions is notable.

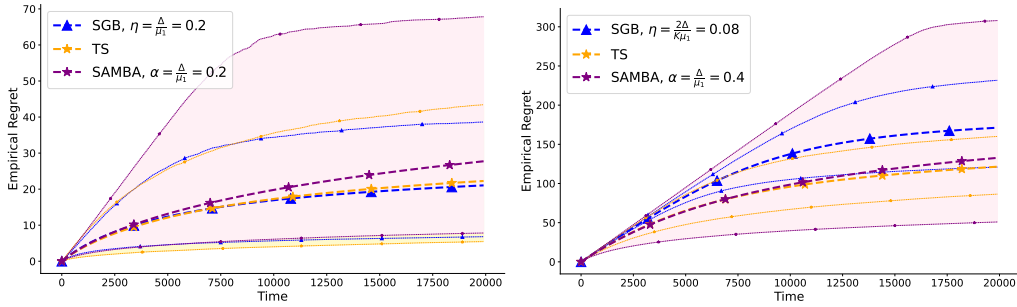

Figure 11: Empirical regret in logarithmic scale up to horizon  $T = 10^4$ , averaged over  $N = 10^4$  trajectories on two bandit problems with small averages:  $\mu_1 = 0.05$  and  $\mu_2 = 0.04$  (Left) and  $K = 10$ ,  $\mu_1 = 0.05$ ,  $\mu_3 = \dots = \mu_{10} = 0.03$  (Right). In both cases, SGB is tuned with  $\eta = \frac{2\Delta}{K\mu_1}$  while SAMBA uses  $\alpha = \frac{\Delta}{\mu_1}$ .

We then consider a third experiment with  $K = 10$  arms, defined by the following means:

$$\mu_{\text{xp.3}} = \{0.1, 0.09, 0.09, 0.08, 0.08, 0.08, 0.05, 0.05, 0.05, 0.05\}, \quad \text{so } \frac{\Delta}{\mu_1} = 0.1,$$

In this setting, several sub-optimal arms have sub-optimality gaps up to five times larger than that of the second-best arm. As illustrated in Figure 12, and in line with the discussion of the second experiment in Figure 5, the performance of PG policies degrades (specifically, compared to optimal policies like TS) when the learning rate is tailored with respect to the second-best arm, while larger learning rates could improve performance for arms with larger gaps. However, considering arm-dependent learning rates would require oracle knowledge of *all* arm means, which might be unrealistic in many applications.

Finally, in order to further understand why SGB compares less favorably to SAMBA as in the experiments of Section G.2, we investigated whether SGB could perform better when rewards are centered around 0 (Rademacher) rather than always positive, as in the case of Bernoulli rewards. From a statistical

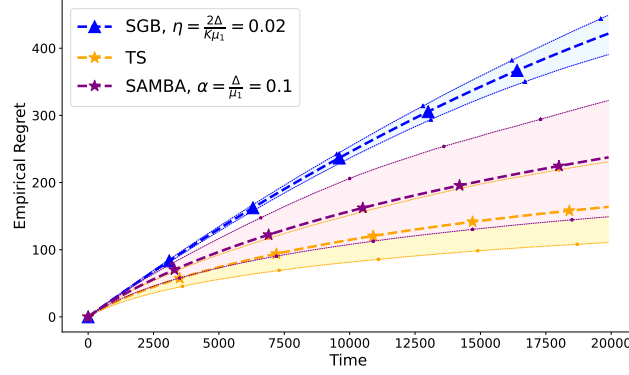

Figure 12: Empirical regret in logarithmic scale up to horizon  $T = 10^4$ , averaged over  $N = 10^4$  trajectories on the bandit problem defined by  $K = 10$  and  $\mu = \mu_{\text{xp.3}}$ . SGB is tuned with  $\eta = \frac{2\Delta}{K\mu_1}$  while SAMBA uses  $\alpha = \frac{\Delta}{\mu_1}$ .

perspective, an instance with Rademacher distributions of means  $(\mu_k)_{k \in [K]}$  is strictly equivalent to an instance with Bernoulli distributions of means  $(\frac{\mu_k+1}{2})_{k \in [K]}$ . However, the experiment presented in Figure 13 shows that the results of SGB tuned with  $\eta = 2\Delta/K$  for Rademacher distributions are significantly better than the results of SGB with  $\eta = \frac{\Delta}{K}$  for the corresponding Bernoulli distributions, which is nevertheless an “equivalent” tuning of SGB, more precisely both match the critical learning rate in their respective setting. This can be understood through Theorem 1, which shows that even though both algorithms use the same oracle knowledge, the logarithmic term of the bound in the Bernoulli case is twice as large as the bound in the Rademacher case.

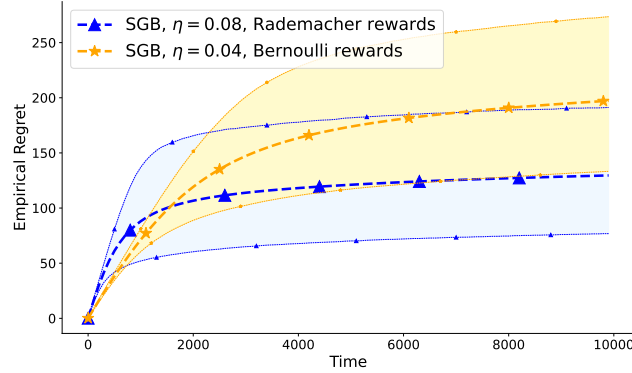

Figure 13: Empirical regret up to horizon  $T = 10^4$ , averaged over  $N = 10^4$  trajectories on the five-armed bandit problem defined by  $\mu_1 = 0.2$  and  $\mu_2 = \dots = \mu_5 = 0$  for the Rademacher instance, and the corresponding Bernoulli instance.

This last result suggests that the performance of SGB is optimized when the rewards cover a centered interval like  $[-1, 1]$ , in particular if  $\eta$  is tuned solely using that the rewards are bounded within a known range. Intuitively, it is natural to expect that the full potential of the theoretical tuning from Theorem 1 is achieved when the restriction on  $\eta$  is tight due to upper bounding the failure regret is tight, which we proved to be the case for Rademacher arms (see the paragraph “tightness of the bound” after Theorem 1). In scenarios where  $\eta$  is tuned using additional moment knowledge—for instance, on the second moment  $s^2$ —any transformation that minimizes  $\frac{\Delta}{s^2}$  would also lead to better empirical performance. For a closely related discussion, centered on the properties of adding baselines in SGB’s update, we refer to Section 6 of [1].
